# Supplementary material for: Visible-light-induced tandem reaction of quinoxalin-2(1H)-ones, alkenes, and sulfonyl chlorides
Source: Royal Society of Chemistry journal article supplement (doi:10.1039/d4ob00960f), 2024-01-01

*supporting information for*

## **Visible-Light-Induced Tandem Reaction of Quinoxalin-2(1H)-ones, Alkenes, and Sulfonyl Chlorides**

Yaru Lu,<sup>a</sup> Meng Li,<sup>a</sup> Qianqian Feng,<sup>a</sup> Ziqin Zhang,<sup>a</sup> Zhenting Zhang,<sup>a</sup> Kui Lu,<sup>b</sup> Zhengyu

Liu<sup>a,\*</sup> and Xia Zhao<sup>a,\*</sup>

<sup>a</sup> *College of Chemistry, Tianjin Key Laboratory of Structure and Performance for Functional Molecules, Key laboratory of Inorganic-organic Hybrid Functional Material Chemistry, Ministry of Education, Tianjin Normal University, Tianjin, China, 300387*

<sup>b</sup> *China International Science and Technology Cooperation Base of Food Nutrition/Safety and Medicinal Chemistry, College of Biotechnology, Tianjin University of Science & Technology, Tianjin, China, 300457*

\*E-mail: [hxxylzhy@tjnu.edu.cn](mailto:hxxylzhy@tjnu.edu.cn); [hxxyzhx@mail.tjnu.edu.cn](mailto:hxxyzhx@mail.tjnu.edu.cn)

| <b>Contents</b>                                                                      | <b>Page</b> |
|--------------------------------------------------------------------------------------|-------------|
| <b>1. General procedure for the synthesis of substrates</b>                          | <b>1</b>    |
| <b>2. Reaction Optimization</b>                                                      | <b>1</b>    |
| <b>3. Larger-Scale Experiments</b>                                                   | <b>2</b>    |
| <b>4. Radical trapping experiments</b>                                               | <b>2-3</b>  |
| <b>5. Fluorescence quenching studies</b>                                             | <b>3-5</b>  |
| <b>6. Unsuitable substrates</b>                                                      | <b>5</b>    |
| <b>7. Copies of <sup>1</sup>H NMR, <sup>13</sup>C and <sup>19</sup>F NMR spectra</b> | <b>6-91</b> |

## 1. General procedure for the synthesis of substrates 1a-1q

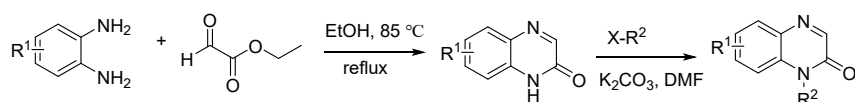

Ethyl 2-oxoacetate (50% in toluene, 4.5g, 22.0 mmol, 1.1 equiv.) was added to a suspension of o-arylenediamine (20.0 mmol, 1.0 equiv.) in ethanol (40 mL, 0.5 M). The reaction mixture was stirred and refluxed in an oil bath for 1 h, then stirred at room temperature for 16 h. Upon completion (as monitored by TLC), the precipitate was filtered and washed with ethanol, then dried to give quinoxalinone. For alkylation, the corresponding halogenoalkane (16 mmol, 1.6 equiv.) was added to a suspension of quinoxalinone (10 mmol, 1.0 equiv.) and potassium carbonate (12 mmol, 1.2 equiv.) in DMF (20.0 mL, 0.5M). The mixture was stirred at room temperature for 16 h. Upon completion (as monitored by TLC), the reaction mixture was washed with saturated solution of ammonium chloride (5.0 mL), ethyl acetate (10.0 mL) and water (10.0 mL). The organic layer was separated and the aqueous layer was extracted with ethyl acetate (2 × 10.0 mL). The combined organic layers were dried with anhydrous Na<sub>2</sub>SO<sub>4</sub>, filtered and concentrated under reduced pressure. The resulting organic residue was purified by flash chromatography column over silica gel (SiO<sub>2</sub>) to afford the alkylated quinoxalinone.

## 2. Reaction optimization

**Table S1** Reaction Optimization<sup>a</sup>

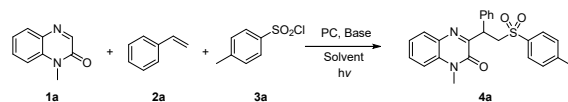

| Entry | 2a (eq.) | 3a (eq.) | PC (mol%)                                                              | Base (eq.)                            | Solvent (mL)  | Light Source | Time (h) | Yield (%) |
|-------|----------|----------|------------------------------------------------------------------------|---------------------------------------|---------------|--------------|----------|-----------|
| 1     | 2.0      | 2.0      | 4-CzIPN (2.0)                                                          | K <sub>2</sub> HPO <sub>4</sub> (1.5) | DCE (2.0)     | 24 W Green   | 12       | 0         |
| 2     | 2.0      | 2.0      | 4-CzIPN (2.0)                                                          | K <sub>2</sub> HPO <sub>4</sub> (1.5) | DCE (2.0)     | 24 W White   | 12       | 46        |
| 3     | 2.0      | 2.0      | 4-CzIPN (2.0)                                                          | K <sub>2</sub> HPO <sub>4</sub> (1.5) | DCE (2.0)     | 24 W Purple  | 12       | trace     |
| 4     | 2.0      | 2.0      | 4-CzIPN (2.0)                                                          | K <sub>2</sub> HPO <sub>4</sub> (1.5) | DCE (2.0)     | 24 W Blue    | 12       | 54        |
| 5     | 2.0      | 2.0      | 4-CzIPN (2.0)                                                          | K <sub>2</sub> HPO <sub>4</sub> (1.5) | Toluene (2.0) | 24 W Blue    | 12       | 15        |
| 6     | 2.0      | 2.0      | 4-CzIPN (2.0)                                                          | K <sub>2</sub> HPO <sub>4</sub> (1.5) | MeCN (2.0)    | 24 W Blue    | 12       | trace     |
| 7     | 2.0      | 2.0      | 4-CzIPN (2.0)                                                          | K <sub>2</sub> HPO <sub>4</sub> (1.5) | THF (2.0)     | 24 W Blue    | 12       | trace     |
| 8     | 2.0      | 2.0      | 4-CzIPN (2.0)                                                          | K <sub>2</sub> HPO <sub>4</sub> (1.5) | DMAc (2.0)    | 24 W Blue    | 12       | 34        |
| 9     | 2.0      | 2.0      | 4-CzIPN (2.0)                                                          | K <sub>2</sub> HPO <sub>4</sub> (1.5) | acetone (2.0) | 24 W Blue    | 12       | 34        |
| 10    | 2.0      | 2.0      | 4-CzIPN (2.0)                                                          | KF (1.5)                              | DCE (2.0)     | 24 W Blue    | 12       | 76        |
| 11    | 2.0      | 2.0      | 4-CzIPN (2.0)                                                          | DBU (1.5)                             | DCE (2.0)     | 24 W Blue    | 12       | 53        |
| 12    | 2.0      | 2.0      | 4-CzIPN (2.0)                                                          | K <sub>2</sub> CO <sub>3</sub> (1.5)  | DCE (2.0)     | 24 W Blue    | 12       | 57        |
| 13    | 2.0      | 2.0      | 4-CzIPN (2.0)                                                          | Na <sub>2</sub> CO <sub>3</sub> (1.5) | DCE (2.0)     | 24 W Blue    | 12       | 34        |
| 14    | 2.0      | 2.0      | 4-CzIPN (2.0)                                                          | K <sub>3</sub> PO <sub>4</sub> (1.5)  | DCE (2.0)     | 24 W Blue    | 12       | 89        |
| 15    | 2.0      | 2.0      | 4-CzIPN (2.0)                                                          | K <sub>3</sub> PO <sub>4</sub> (1.0)  | DCE (2.0)     | 24 W Blue    | 12       | 83        |
| 16    | 2.0      | 2.0      | 4-CzIPN (2.0)                                                          | K <sub>3</sub> PO <sub>4</sub> (2.0)  | DCE (2.0)     | 24 W Blue    | 12       | 84        |
| 17    | 2.0      | 2.0      | PTH (2.0)                                                              | K <sub>3</sub> PO <sub>4</sub> (1.5)  | DCE (2.0)     | 24 W Blue    | 12       | 76        |
| 18    | 2.0      | 2.0      | fac-Ir(ppy) <sub>3</sub> (2.0)                                         | K <sub>3</sub> PO <sub>4</sub> (1.5)  | DCE (2.0)     | 24 W Blue    | 12       | 13        |
| 19    | 2.0      | 2.0      | Ir[dF(CF <sub>3</sub> )ppy] <sub>2</sub> (dtbbpy)PF <sub>6</sub> (2.0) | K <sub>3</sub> PO <sub>4</sub> (1.5)  | DCE (2.0)     | 24 W Blue    | 12       | 32        |
| 20    | 2.0      | 2.0      | Na <sub>2</sub> Eosin Y (10)                                           | K <sub>3</sub> PO <sub>4</sub> (1.5)  | DCE (2.0)     | 24 W Blue    | 12       | 0         |
| 21    | 1.5      | 2.0      | 4-CzIPN (2.0)                                                          | K <sub>3</sub> PO <sub>4</sub> (1.5)  | DCE (2.0)     | 24 W Blue    | 12       | 82        |

|    |     |     |               |                                      |           |             |    |         |
|----|-----|-----|---------------|--------------------------------------|-----------|-------------|----|---------|
| 22 | 2.5 | 2.0 | 4-CzIPN (2.0) | K <sub>3</sub> PO <sub>4</sub> (1.5) | DCE (2.0) | 24 W Blue   | 12 | 81      |
| 23 | 2.0 | 1.5 | 4-CzIPN (2.0) | K <sub>3</sub> PO <sub>4</sub> (1.5) | DCE (2.0) | 24 W Blue   | 12 | 83      |
| 24 | 2.0 | 2.5 | 4-CzIPN (2.0) | K <sub>3</sub> PO <sub>4</sub> (1.5) | DCE (2.0) | 24 W Blue   | 12 | 81      |
| 25 | 2.0 | 2.0 | 4-CzIPN (1.5) | K <sub>3</sub> PO <sub>4</sub> (1.5) | DCE (2.0) | 24 W Blue   | 12 | 85      |
| 26 | 2.0 | 2.0 | 4-CzIPN (2.5) | K <sub>3</sub> PO <sub>4</sub> (1.5) | DCE (2.0) | 24 W Blue   | 12 | 87      |
| 27 | 2.0 | 2.0 | 4-CzIPN (2.0) | K <sub>3</sub> PO <sub>4</sub> (1.5) | DCE (1.5) | 24 W Blue   | 12 | 84      |
| 28 | 2.0 | 2.0 | 4-CzIPN (2.0) | K <sub>3</sub> PO <sub>4</sub> (1.5) | DCE (2.5) | 24 W Blue   | 12 | 86      |
| 29 | 2.0 | 2.0 | 4-CzIPN (2.0) | K <sub>3</sub> PO <sub>4</sub> (1.5) | DCE (2.0) | 18 W Blue   | 12 | 81      |
| 30 | 2.0 | 2.0 | 4-CzIPN (2.0) | K <sub>3</sub> PO <sub>4</sub> (1.5) | DCE (2.0) | 30 W Blue   | 12 | 84      |
| 31 | 2.0 | 2.0 | 4-CzIPN (2.0) | K <sub>3</sub> PO <sub>4</sub> (1.5) | DCE (2.0) | 24 W Green  | 12 | 0       |
| 32 | 2.0 | 2.0 | 4-CzIPN (2.0) | K <sub>3</sub> PO <sub>4</sub> (1.5) | DCE (2.0) | 24 W White  | 12 | 46      |
| 33 | 2.0 | 2.0 | 4-CzIPN (2.0) | K <sub>3</sub> PO <sub>4</sub> (1.5) | DCE (2.0) | 24 W Purple | 12 | trace   |
| 34 | 2.0 | 2.0 | -             | K <sub>3</sub> PO <sub>4</sub> (1.5) | DCE (2.0) | 24 W Blue   | 12 | 0       |
| 35 | 2.0 | 2.0 | -             | K <sub>3</sub> PO <sub>4</sub> (1.5) | DCE (2.0) | 24 W Purple | 12 | 0       |
| 36 | 2.0 | 2.0 | 4-CzIPN (2.0) | K <sub>3</sub> PO <sub>4</sub> (1.5) | DCE (2.0) | 24 W Blue   | 12 | 0(air)  |
| 37 | 2.0 | 2.0 | 4-CzIPN (2.0) | K <sub>3</sub> PO <sub>4</sub> (1.5) | DCE (2.0) | 24 W Blue   | 12 | 0(dark) |

<sup>a</sup> **1a** (0.20 mmol), **2a** (0.30-0.50 mmol), **3a** (0.30-0.50 mmol), photocatalyst (0.003-0.02 mmol), base (0.20-0.40 mmol) in solvent (1.5-2.5 mL) under the irradiation of LEDs for 12 h at 40 °C.

### 3. Larger-scale experiments

To a 100.0 mL flame-dried round Schlenk tube equipped with a magnetic stir bar was added quinoxalin-2(1H)-ones **1a** (0.64 g, 4.0 mmol), styrene **2a** (0.83 g, 8.0 mmol) and tosyl chloride **3a** (1.53 g, 8.0 mmol), K<sub>3</sub>PO<sub>4</sub> (1.27 g, 6.0 mmol), 4CzIPN (64.0 mg, 0.08 mmol) and dry DCE (40.0 mL). The resulting mixture was charged with argon. Then, the solution was stirred under the irradiation of 24 W blue LEDs at 40 °C for about 12 h under argon atmosphere. The organic phase was evaporated under reduced pressure to give a residue, which was then purified with chromatography column on silica gel (PE : EA = 3 : 1) to give the corresponding products **4a** as a white solid (1.38 g, 83%).

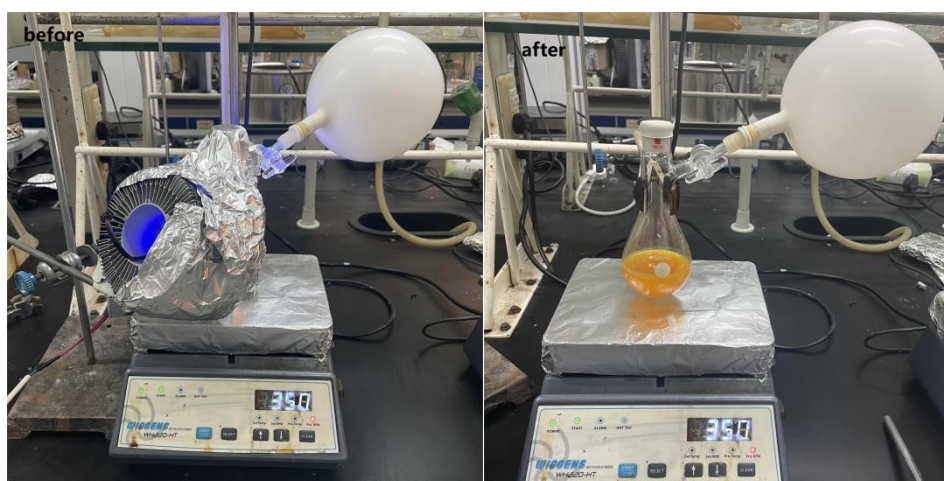

**Figure S1.** The setup for the blue LEDs-driven large-scale reaction

### 4. Radical trapping experiments

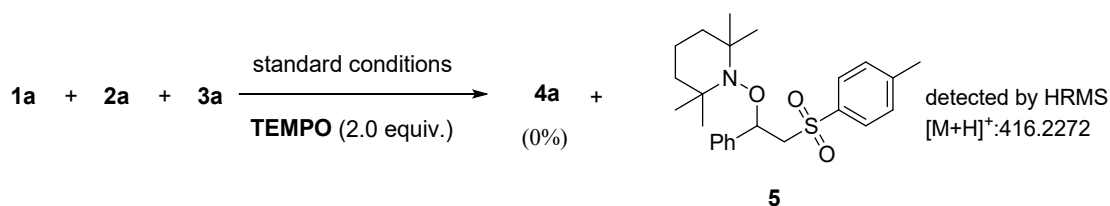

To a solution of **1a** (0.20 mol), **2a** (0.40 mmol), **3a** (0.40 mmol),  $K_3PO_4$  (0.30 mmol), 4CzIPN (2 mol%), TEMPO (0.4 mmol) and dry DCE (2.0 mL). The reaction mixture was evacuated and with argon for three times and stirred under the irradiation of 24 W blue LEDs at 40 °C for about 12 h under argon atmosphere. The reaction was completely inhibited, no desired product was obtained and TEMPO-trapped complex (**5**) was detected by LC-MS analysis. HRMS ESI (m/z):  $[M+H]^+$  calcd for  $C_{24}H_{34}NO_3S^+$  416.2254, found: 416.2272.

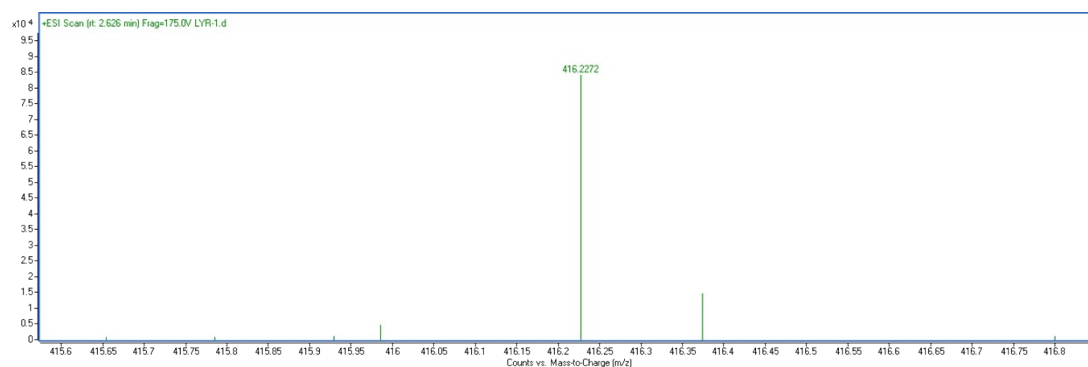

## 5. Fluorescence quenching studies

The fluorescence emission intensity of the reaction solution was recorded using a Cary Eclipse Fluorescence spectrophotometer (Agilent Technologies, USA). The emission wavelength was 537 nm. The samples were prepared by mixing 4CzIPN ( $1.0 \times 10^{-3}$  mol/L) and different amounts of quinoxalin-2(*H*)-one (**1a**) in DCE (total volume = 2.0 mL) in an optical path quartz fluorescence cuvette. The concentration of quinoxalin-2(*H*)-one (**1a**) solution in DCE was  $1.0 \times 10^{-3}$  mol/L. In each quenching experiment, a different amount of quinoxalin-2(*H*)-one solution was titrated into 0.02 mL of 4CzIPN mixed solution (total volume = 2.0 mL). The emission intensity was then collected and the results are shown in Figure S1.



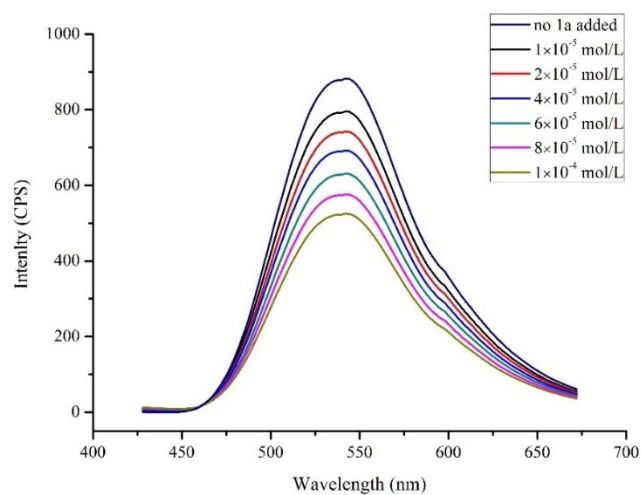

**Figure S1.** Quenching of 4CzIPN fluorescence emission in the presence of quinoxalin-2(*H*)-one.

An indeed fluorescence quenching phenomenon of 4CzIPN under various concentrations of quinoxalin-2(*H*)-one **1a** was demonstrated in a curve of  $[I_0/I]$  vs  $C$  [**1a**], as shown in Figure S2 (Stern-Volmer plots).

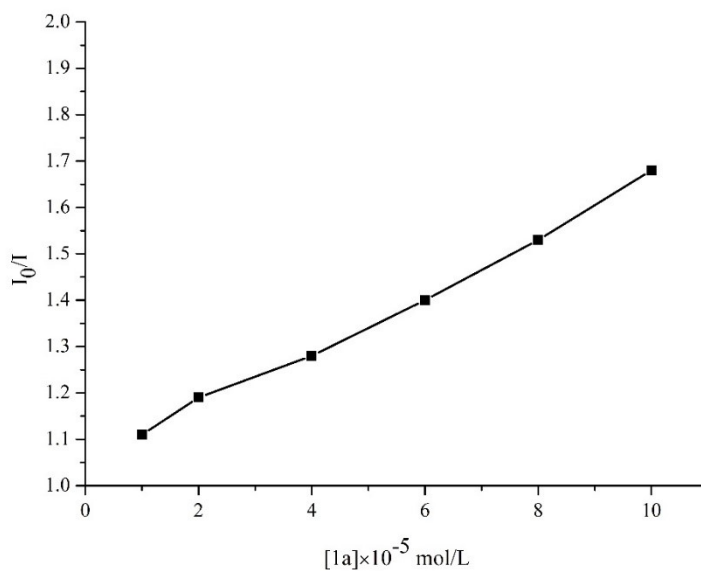

**Figure S2.** Stern-volmer plots.  $I_0$  is the inherent fluorescence intensity of 4-CzIPN.  $I$  is the fluorescence intensity of 4-CzIPN in the presence of **1a**

The fluorescence emission intensity of the reaction solution was recorded using a Cary Eclipse Fluorescence spectrophotometer (Agilent Technologies, USA). The emission wavelength was 537 nm. The samples were prepared by mixing 4CzIPN ( $1.0 \times 10^{-3}$  mol/L) and different amounts of p-toluenesulfonyl chloride (**3a**) in DCE (total volume = 2.0 mL) in an optical path quartz fluorescence cuvette. The concentration of p-Toluenesulfonyl chloride solution in DCE was  $1.0 \times 10^{-3}$  mol/L. In each quenching experiment, a different amount of p-toluenesulfonyl chloride (**3a**) solution was titrated into 0.02 mL of 4CzIPN mixed solution (total volume = 2.0 mL). The emission intensity was then collected and the results are shown in Figure S3.

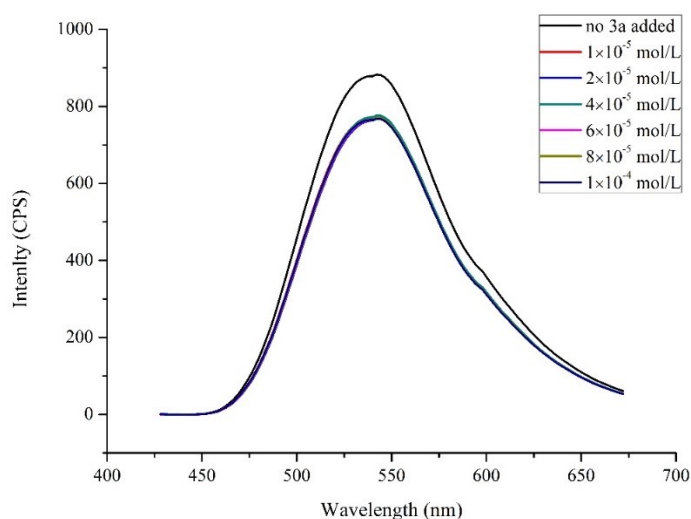

**Figure S3.** Quenching of 4CzIPN fluorescence emission in the presence of **3a**.

An indeed fluorescence quenching phenomenon of 4CzIPN under various concentrations of p-toluenesulfonyl chloride (**3a**) was demonstrated in a curve of  $[I_0/I]$  vs C [**3a**], as shown in Figure S2 (Stern-Volmer plots).

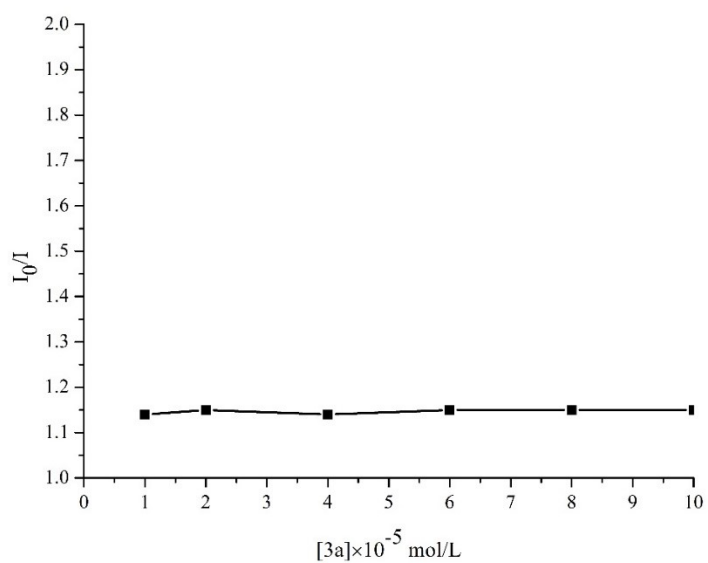

**Figure S4.** Stern-volmer plots.  $I_0$  is the inherent fluorescence intensity of 4-CzIPN.  $I$  is the fluorescence intensity of 4-CzIPN in the presence of **3a**

## 6. Unsuitable substrates

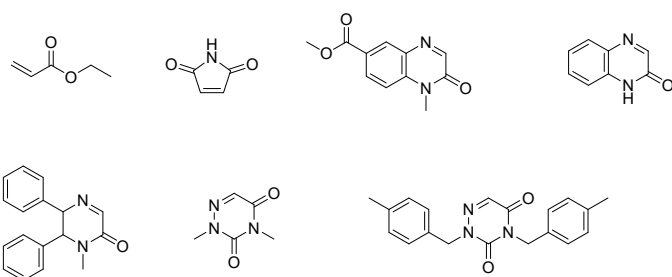

**Figure S5.** Unsuitable substrates

# 7. Copies of <sup>1</sup>H NMR

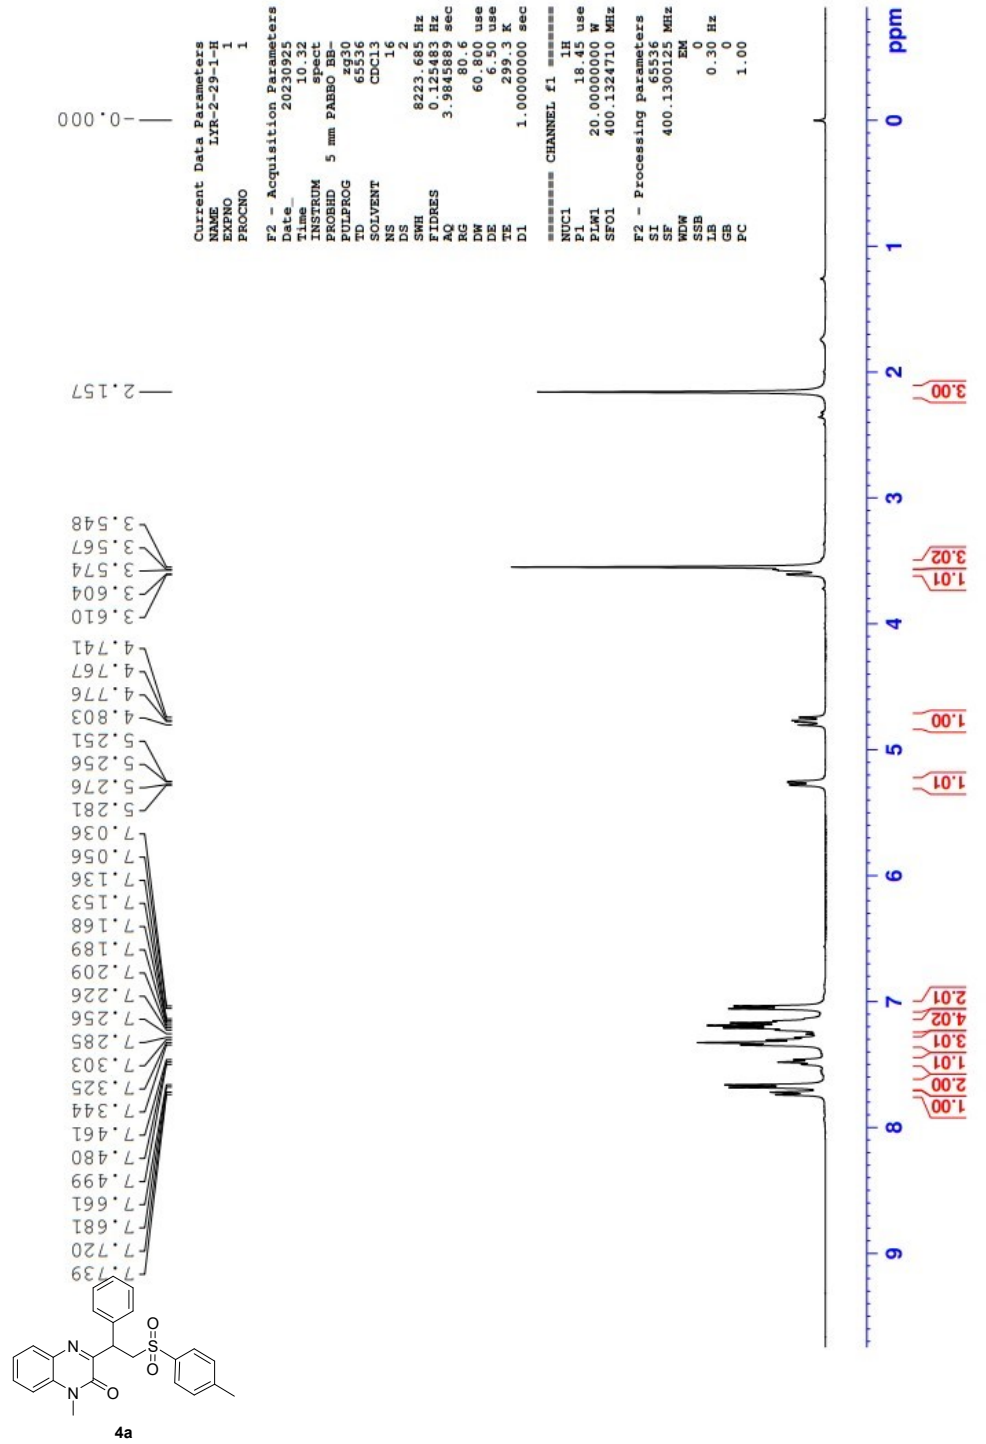

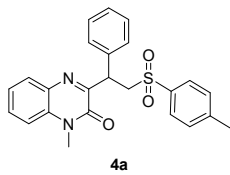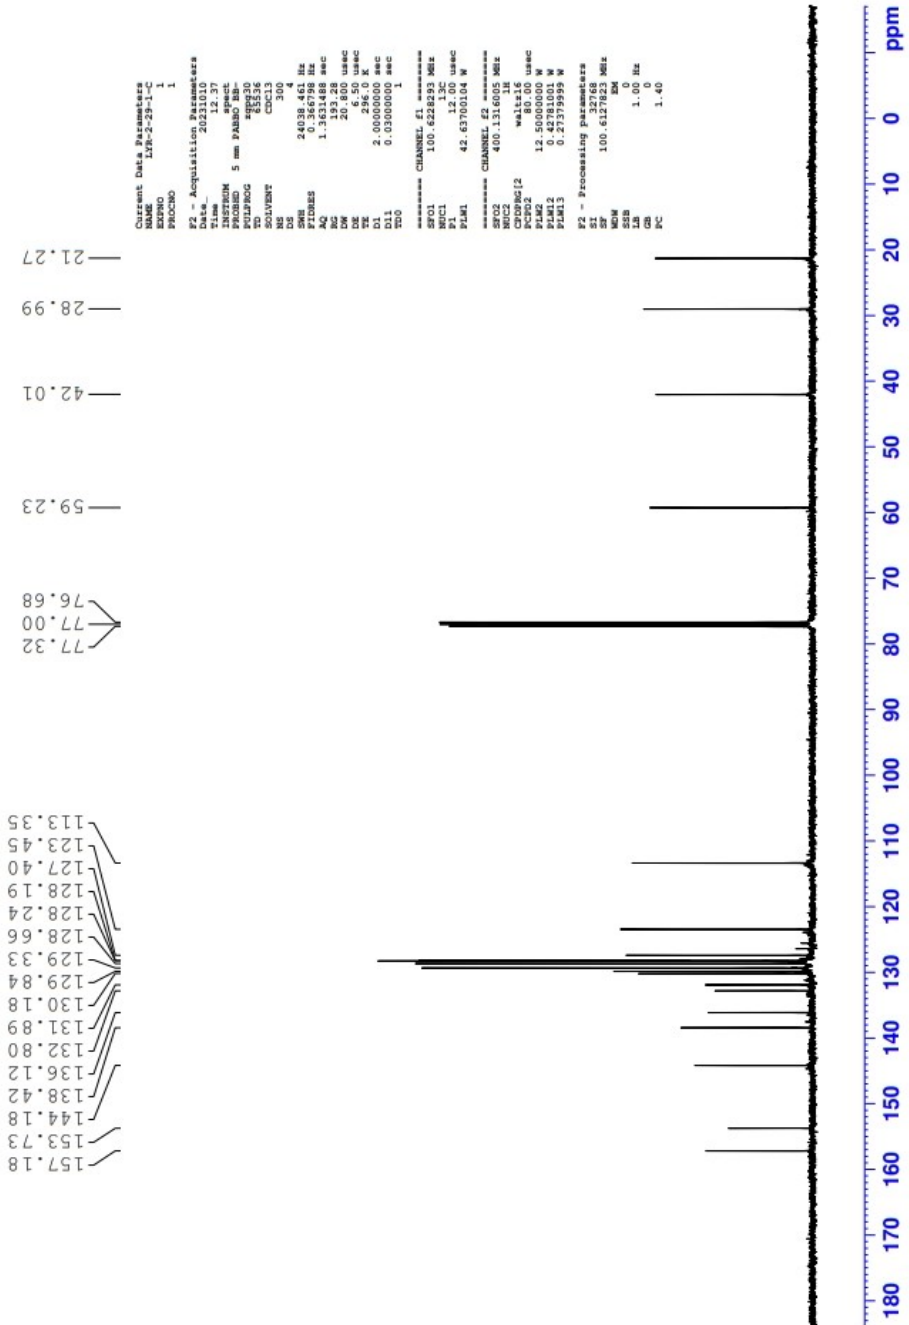

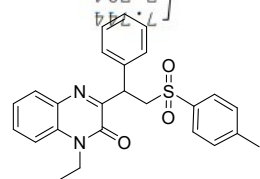

4b

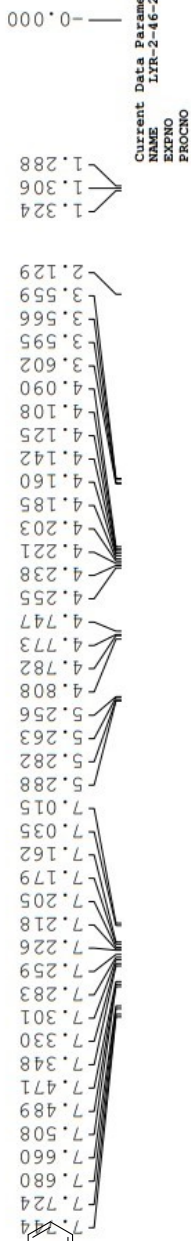

Current Data Parameters  
 NAME LXR-2-46-2-1-H  
 EXPNO 1  
 PROCNO 1

F2 - Acquisition Parameters  
 Date\_ 20231017  
 Time 11 01  
 INSTRUM spect  
 PROBHD 5 mm PABBO BB-  
 PULPROG zg30  
 TD 65536  
 SOLVENT CDCl3  
 NS 16  
 DS 2  
 SWH 8223.685 Hz  
 FIDRES 0.125483 Hz  
 AQ 3.984589 sec  
 RG 324  
 DW 60.800 use  
 DE 6.50 use  
 TE 298.5 K  
 D1 1.00000000 sec

===== CHANNEL f1 =====  
 NUC1 1H  
 P1 19.66 use  
 PLW1 20.00000000 W  
 SF01 400.1324710 MHz

F2 - Processing parameters  
 SI 65536  
 SF 400.1300109 MHz  
 WHW 80  
 SSB 0  
 LB 0.30 Hz  
 GB 0  
 PC 1.00

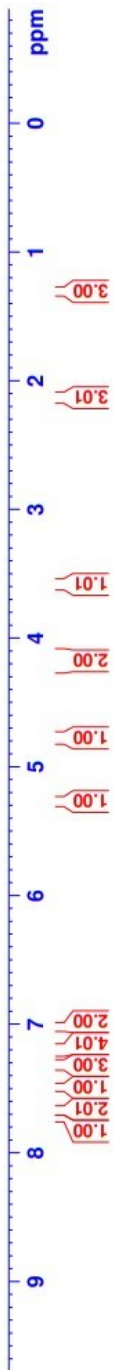

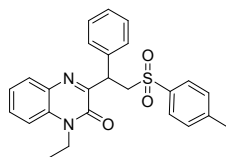

4b

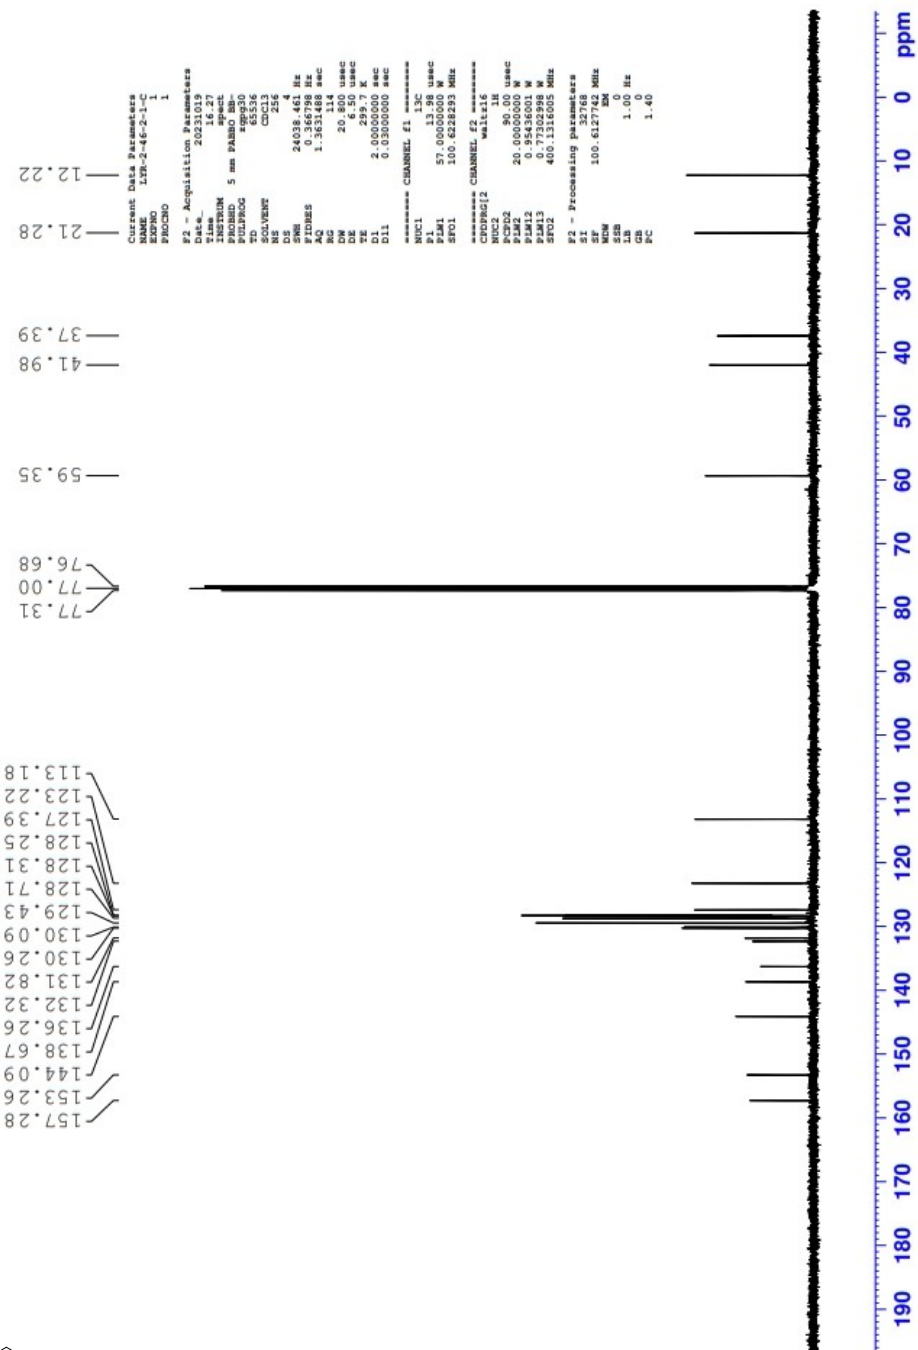

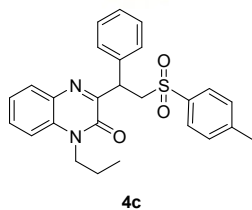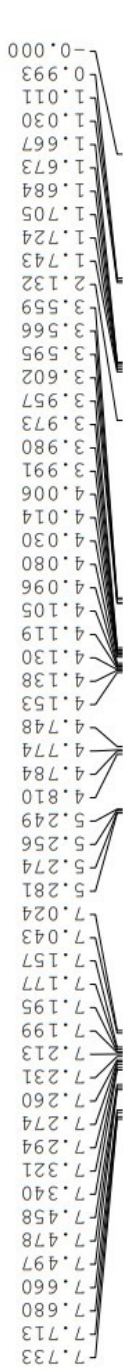

Current Data Parameters  
 Name LXR-249-1-H  
 EXPNO 1  
 PROCNO 1

F2 - Acquisition Parameters  
 Date\_ 20231117  
 Time 11.15  
 INSTRUM QUANTUM-I  
 PROBHD ProbHD  
 PULPROG zgpg30  
 TD 64862  
 SOLVENT CDCl3  
 NS 12  
 DS 4  
 SWH 8108.000 Hz  
 FIDRES 0.125004 Hz  
 AQ 3.9998767 sec  
 RG 53.73  
 DW 61.667 use  
 DE 30.00 use  
 TE 293.8 K  
 NUC1 1H  
 SFO1 400.1113911 MHz  
 D1 1.00000000 sec  
 F1 11.60 use  
 PL1 58.00 dB  
 PLW 0.0000152 W

F2 - Processing Parameters  
 SI 65536  
 SF 400.1050800 MHz  
 WDW EM  
 SSB 0  
 LB 0.30 Hz  
 GB 0  
 PC 4.00

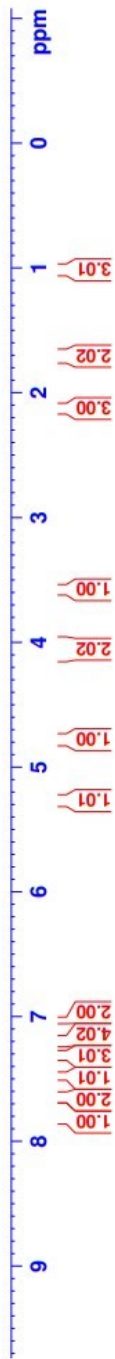



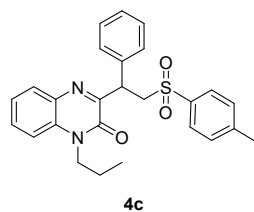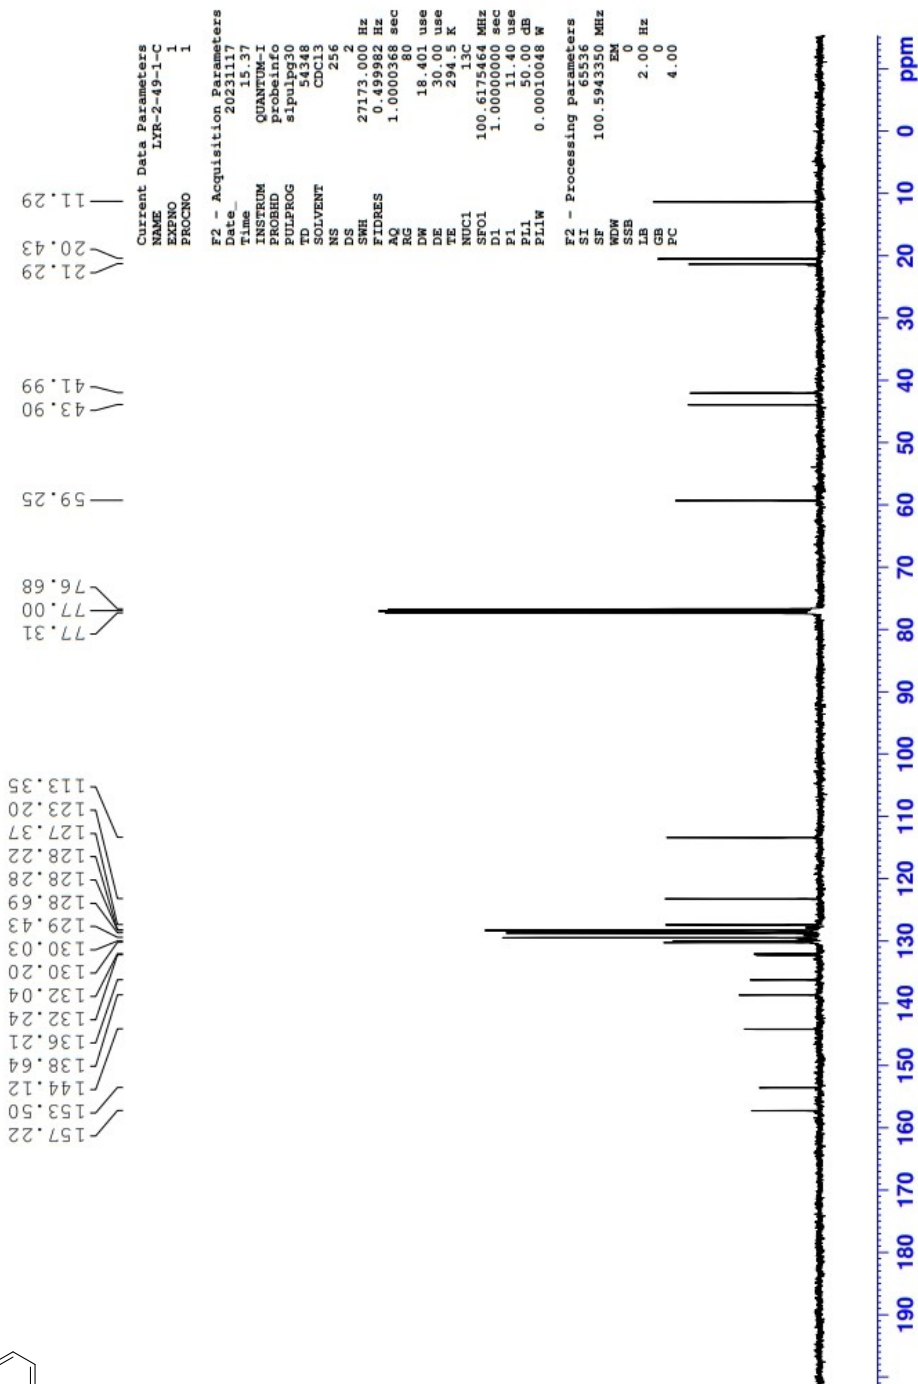

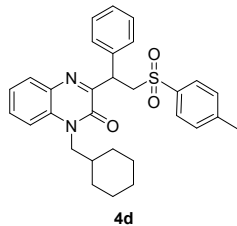

7.716  
7.714  
7.694  
7.673  
7.491  
7.487  
7.469  
7.451  
7.448  
7.320  
7.303  
7.289  
7.258  
7.219  
7.202  
7.184  
7.166  
7.155  
7.148  
7.077  
7.057  
5.275  
5.267  
5.250  
5.242  
4.796  
4.771  
4.760  
4.735  
4.120  
4.101  
4.086  
4.067  
3.920  
3.903  
3.886  
3.869  
3.861  
3.603  
3.575  
3.567  
2.167  
1.800  
1.793  
1.783  
1.746  
1.658  
1.540  
1.512  
1.171  
1.153  
1.130  
1.123  
0.088  
0.000

Current Data Parameters  
 NAME LYR-2-50-1-2-H  
 EXPNO 1  
 PROCNO 1

F2 - Acquisition Parameters  
 Date\_ 20231127  
 Time 19.03

INSTRUM spect  
 PROBHD 5 mm PABBO BB-  
 PULPROG zgpg30  
 SOLVENT CDCl3

DS 16  
 SWH 8223.685 Hz  
 FIDRES 0.125483 Hz  
 AQ 3.9845889 sec  
 RG 101

DW 60.800 use  
 DE 6.50 use  
 TE 297.1 K  
 D1 1.00000000 sec

===== CHANNEL f1 =====  
 NUC1 1H  
 P1 19.46 use  
 PLW1 20.0000000 W  
 SF01 400.1324710 MHz

F2 - Processing parameters  
 SI 65536  
 SF 400.1300110 MHz  
 WDW EM  
 SSB 0  
 LB 0.30 Hz  
 GB 0  
 PC 1.00

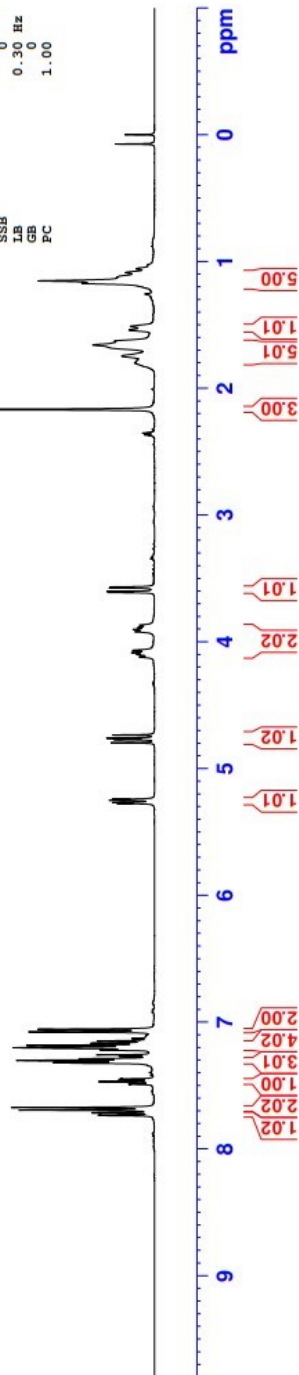

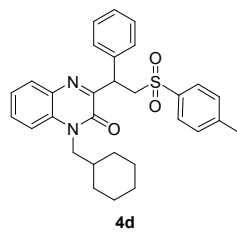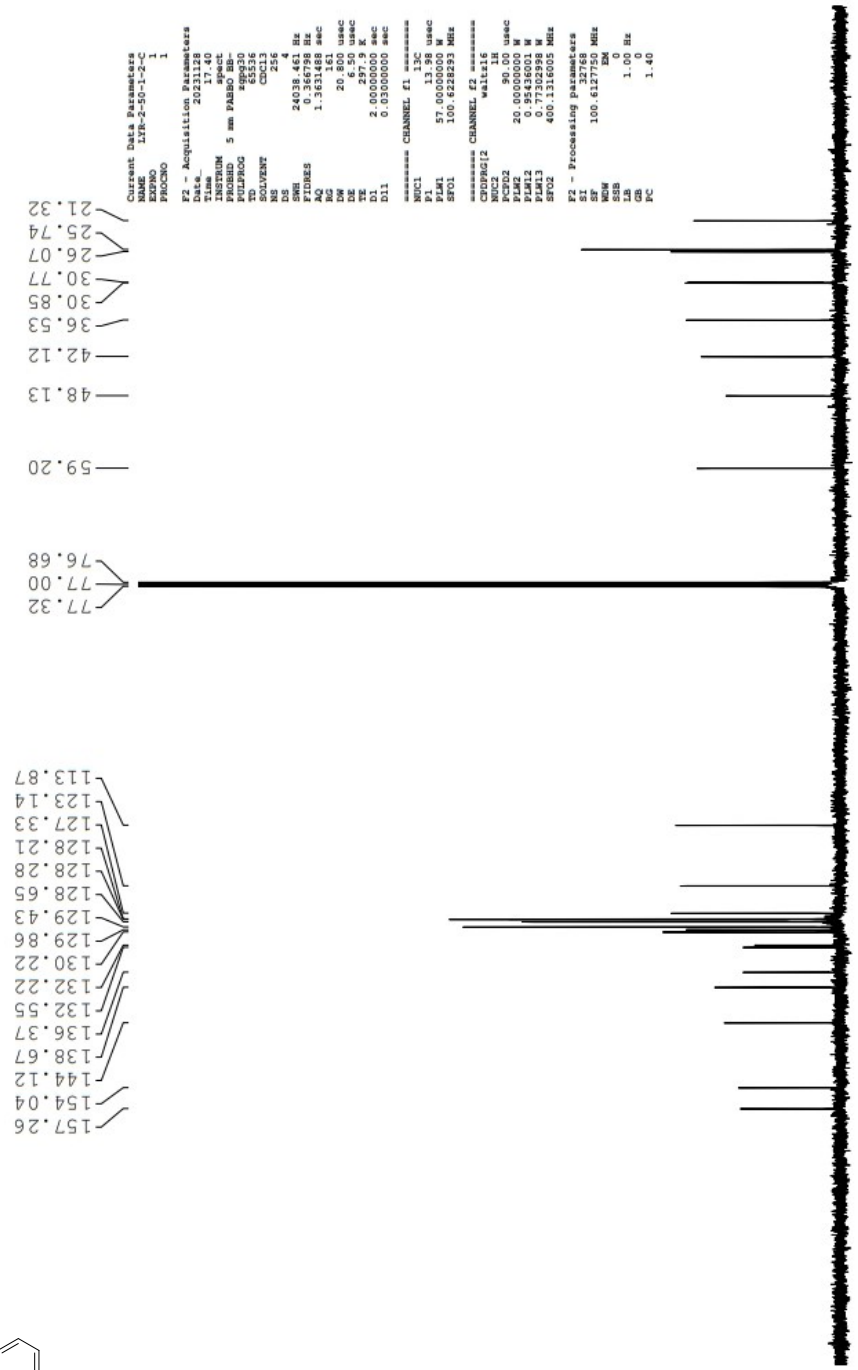

190 180 170 160 150 140 130 120 110 100 90 80 70 60 50 40 30 20 10 0 ppm

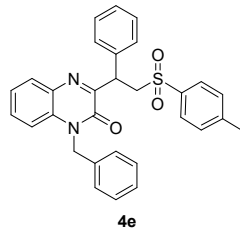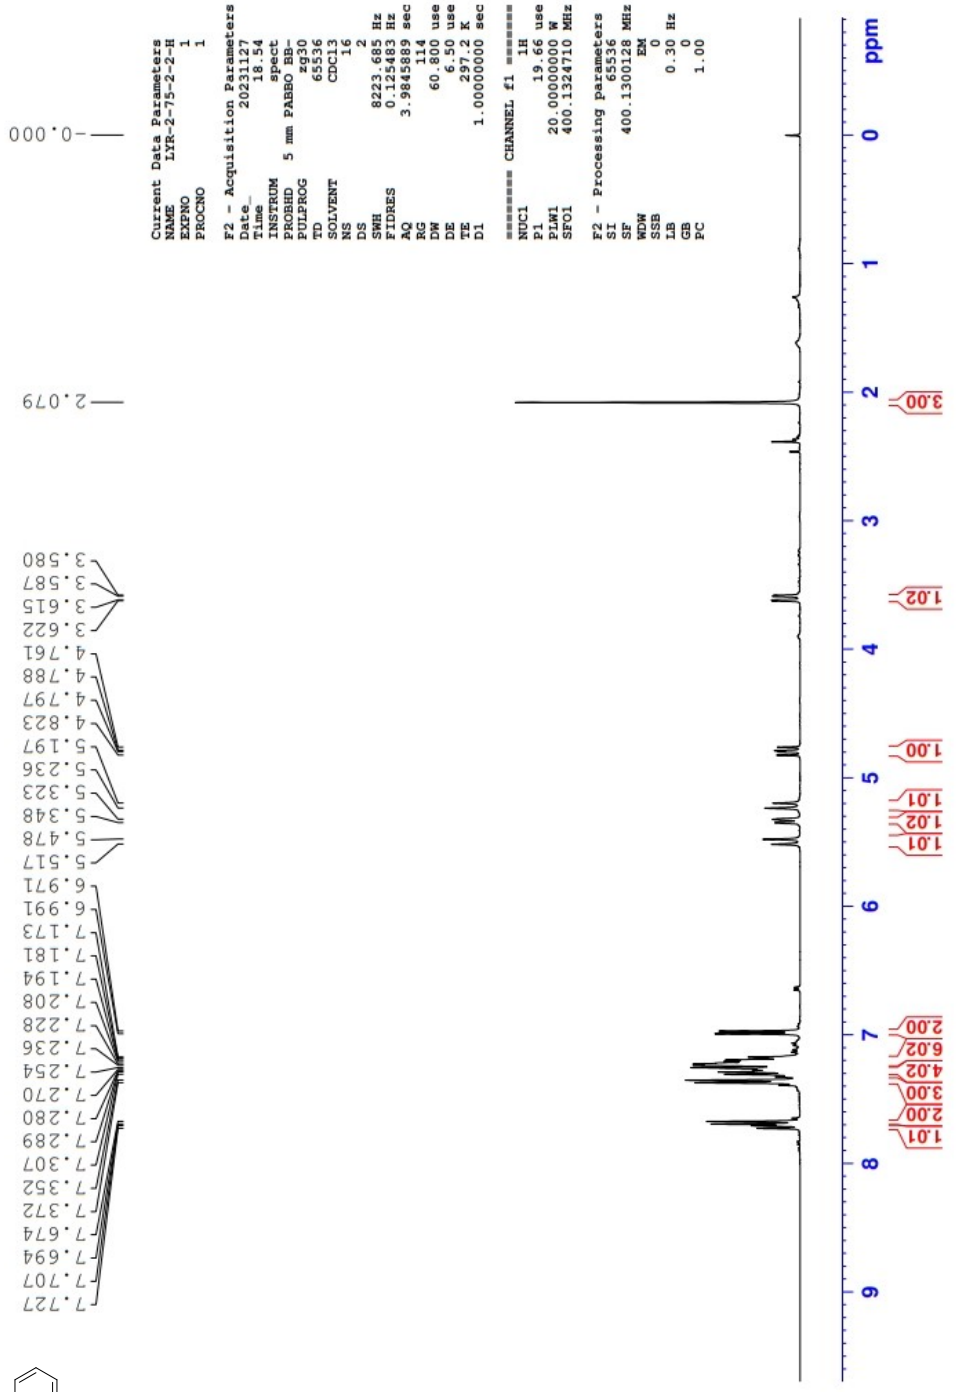

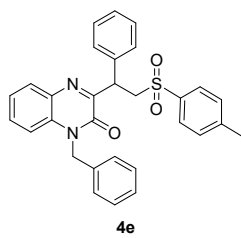

157.43  
154.04  
144.19  
138.58  
136.28  
135.06  
132.26  
132.19  
130.13  
130.06  
129.50  
128.87  
128.76  
128.24  
127.75  
127.46  
127.11  
123.44  
114.17

77.31  
77.00  
76.68

59.31

45.94  
42.15

21.25

Current Data Parameters  
NAME LXR-275-2-2-C  
EXPNO 1  
PROCNO 1  
F2 - Acquisition Parameters  
Date\_ 20210123  
Time 11:18  
INSTRUM spect  
PROBHD 5 mm PABBO BB-  
PULPROG zgpg30  
TD 65536  
SOLVENT CDCl3  
DS 2  
S 27.0  
IS 4  
SR 24038.461 Hz  
AQ 0.00000000 sec  
RG 1.1651488 Hz  
AC 128  
PC 128  
DQ 20.800 usec  
DM 0.00000000 sec  
DE 296.6 K  
TE 2.00000000 sec  
D1 0.03000000 sec  
D11  
===== CHANNEL f1 =====  
NUC1 13C  
P1 13.28 usec  
PL1 57.00000000 M  
SFO1 100.628293 MHz  
===== CHANNEL f2 =====  
CPDPRG2 waltz16  
NUC2 13C  
P2 90.00 usec  
PL2 20.00000000 M  
SFO2 100.628293 MHz  
===== CHANNEL f3 =====  
CPDPRG3 waltz16  
NUC3 13C  
P3 90.00 usec  
PL3 20.00000000 M  
SFO3 100.628293 MHz  
===== CHANNEL f4 =====  
CPDPRG4 waltz16  
NUC4 13C  
P4 90.00 usec  
PL4 20.00000000 M  
SFO4 100.628293 MHz  
F2 - Processing parameters  
SI 32768  
SF 100.612754 MHz  
WDW 0  
SSB 0  
LB 1.00 Hz  
GB 0  
PC 1.40

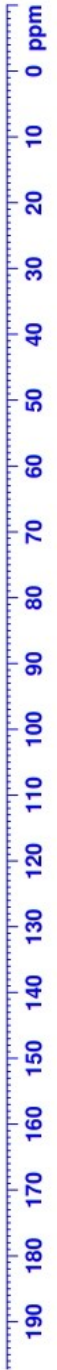

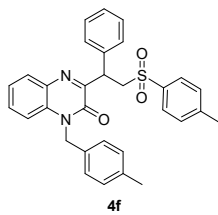

7.713  
7.711  
7.694  
7.688  
7.667  
7.389  
7.387  
7.366  
7.348  
7.270  
7.252  
7.232  
7.213  
7.192  
7.177  
7.133  
7.110  
7.089  
6.982  
6.962  
5.468  
5.429  
5.347  
5.340  
5.321  
5.314  
5.192  
5.153  
4.815  
4.789  
4.779  
4.753  
3.620  
3.613  
3.577  
2.292  
2.073  
0.000

Current Data Parameters  
 NAME LXR-2-81-1-3-H  
 EXPNO 1  
 PROCNO 1

F2 - Acquisition Parameters  
 Date\_ 20231127  
 Time 18.59  
 INSTRUM spect  
 PULPROG 5 mm PABBO B9  
 FIDRES 0.125483 Hz  
 AQC 3.9845889 sec  
 RG 114  
 DW 60.800 use  
 DE 6.50 use  
 TE 297.2 K  
 D1 1.00000000 sec

\*\*\*\*\* CHANNEL f1 \*\*\*\*\*  
 NUC1 1H  
 P1 19.66 use  
 PL1 20.0000000 W  
 SFO1 400.1324710 MHz

F2 - Processing parameters  
 SI 65536  
 SF 400.1300134 MHz  
 WDW EM  
 SSB 0  
 LB 0.30 Hz  
 GB 0  
 FC 1.00

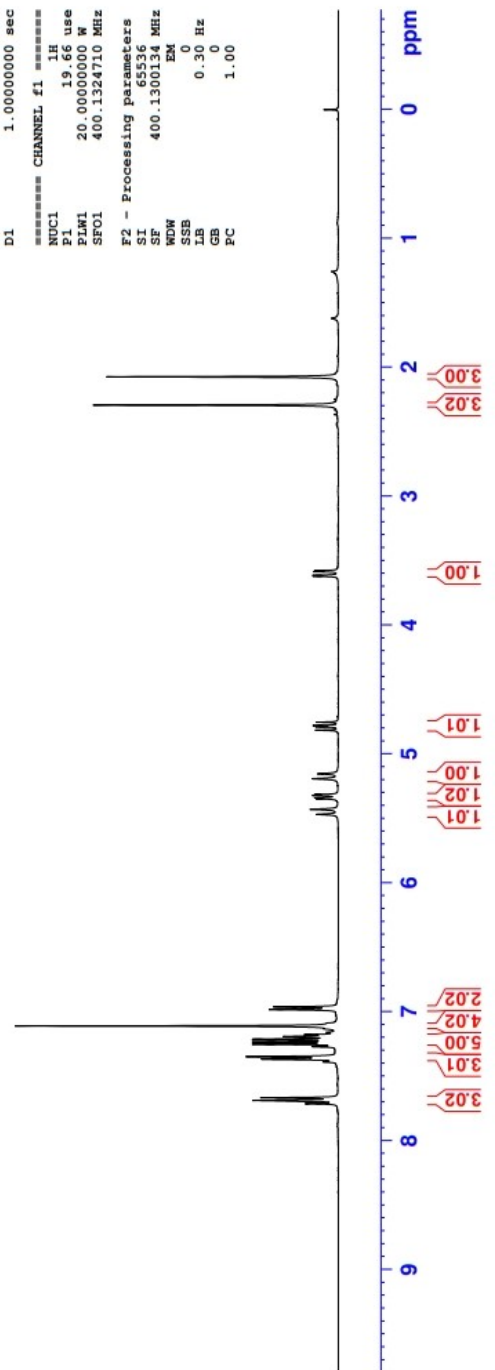

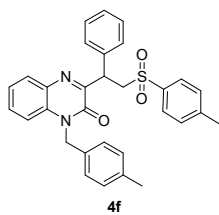

157.41  
154.02  
144.16  
138.62  
137.48  
136.30  
132.25  
132.05  
130.09  
130.02  
129.51  
128.74  
128.24  
127.44  
127.13  
123.36  
114.19

77.31  
77.00  
76.68

21.24  
21.04

```

Current Data Parameters
Date_ 20231128
Time_ 10:02:52
INSTRUM spect
PROBHD 5 mm PABBO BB-
PULPROG zgpg30
SOLVENT CDCl3
NS 256
SMR 24038.461 Hz
FIDRES 0.366798 Hz
AQ 1.363141 sec
RG 163
DM 800.000 usec
DE 397.9 usec
TE 297.9 K
D1 2.00000000 sec
D11 0.03000000 sec

===== CHANNEL f1 =====
NUC1 13C
P1M1 13C
SFO1 57.00000000 MHz

===== CHANNEL f2 =====
CPDPRG2 waltz16
NUC2 13C
P1M2 13C
SFO2 57.00000000 MHz
PCPD2 90.00 usec
PLM2 20.00000000 W
PLM12 0.95486001 W
SFO2 400.1316005 MHz

F2 - Processing parameters
SI 32768
SF 100.6127757 MHz
WDW EM
SSB 0
GB 0
PC 1.40
  
```

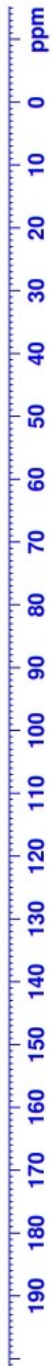

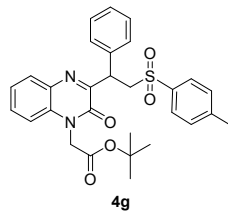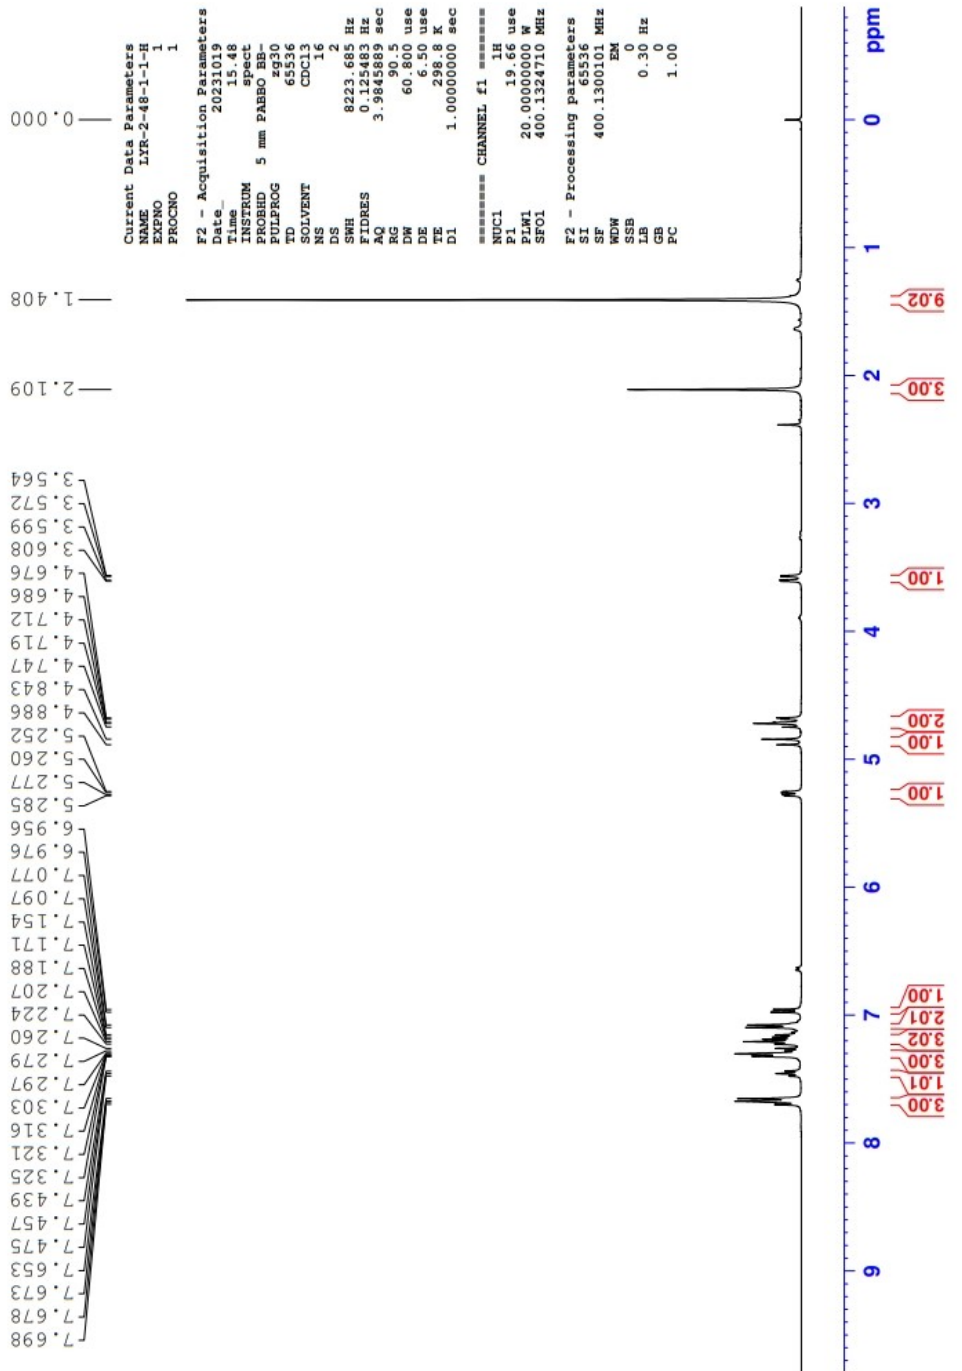



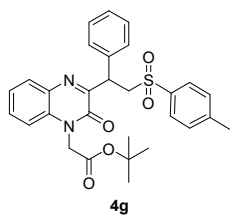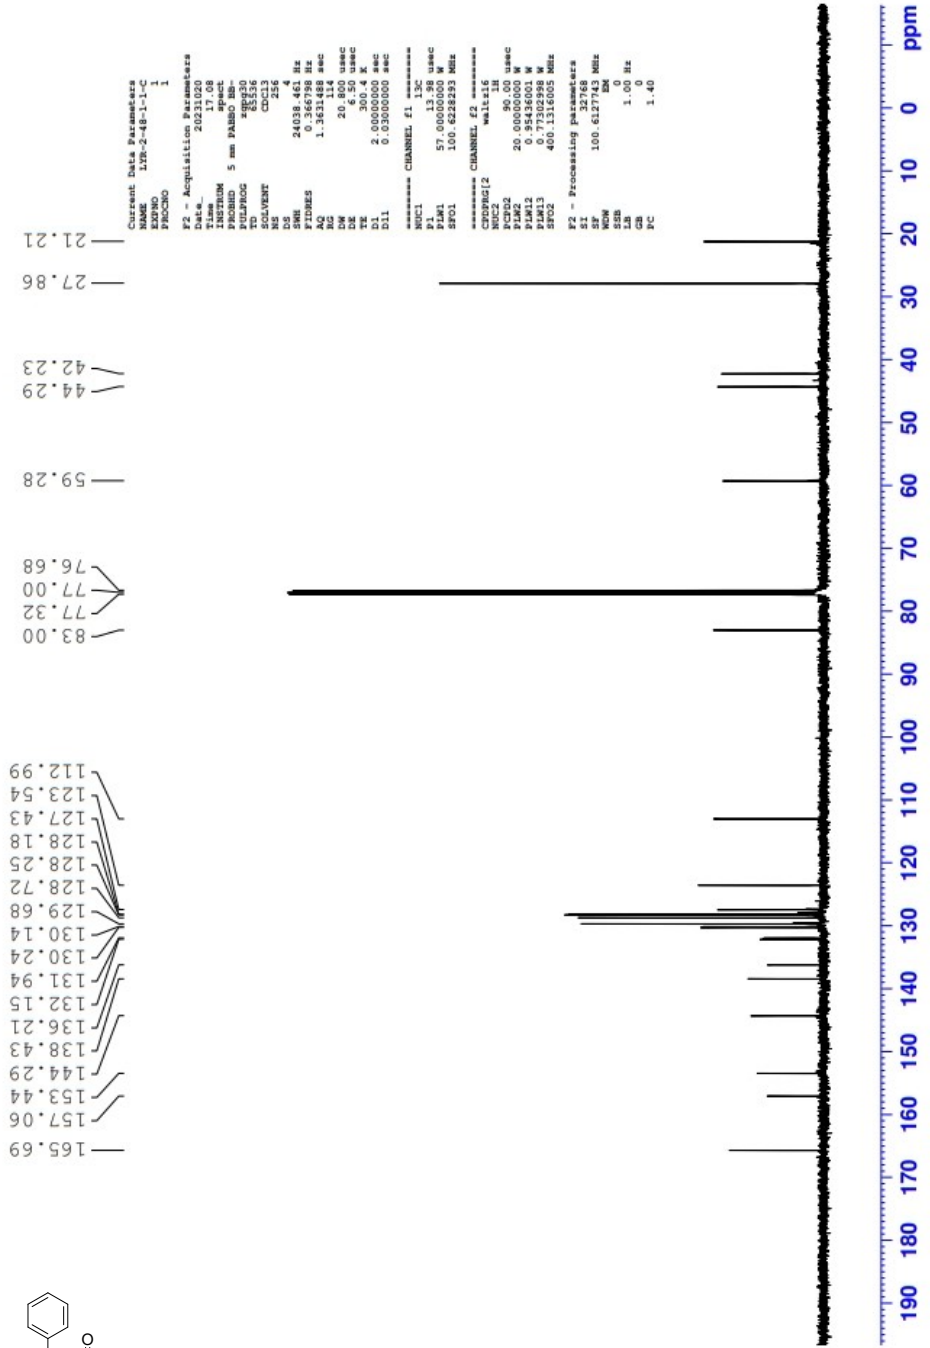

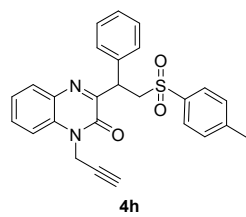

7.704  
7.684  
7.669  
7.649  
7.530  
7.511  
7.493  
7.363  
7.343  
7.325  
7.307  
7.256  
7.236  
7.219  
7.200  
7.181  
7.164  
7.033  
7.013  
5.296  
5.290  
5.270  
5.264  
5.118  
5.113  
5.074  
5.069  
4.775  
4.749  
4.739  
4.736  
4.713  
4.690  
4.686  
3.574  
3.568  
3.539  
3.532  
2.326  
2.320  
2.315  
2.063

Current Data Parameters  
 NAME LXR-2-45-1-1-H  
 EXPNO 1  
 PROCNO 1

F2 - Acquisition Parameters  
 Date\_ 20231019  
 Time 16.03  
 INSTRUM spect  
 PROBHD 5 mm PABBO BB-  
 PULPROG zg30  
 ID 65536  
 SOLVENT CDCl3  
 NS 12  
 DS 2  
 SWH 8223.685 Hz  
 FIDRES 0.125483 Hz  
 AQ 3.9845889 sec  
 RG 80.6  
 DW 60.800 use  
 DE 6.50 use  
 TE 299.6 K  
 D1 1.00000000 sec

===== CHANNEL f1 =====  
 NUC1 <sup>1</sup>H  
 P1 19.46 use  
 PLH1 20.00000000 W  
 SF01 400.1324710 MHz

F2 - Processing parameters  
 SI 65536  
 SF 400.1300116 MHz  
 WDW EM  
 SSB 0  
 LB 0.30 Hz  
 GB 0  
 PC 1.00

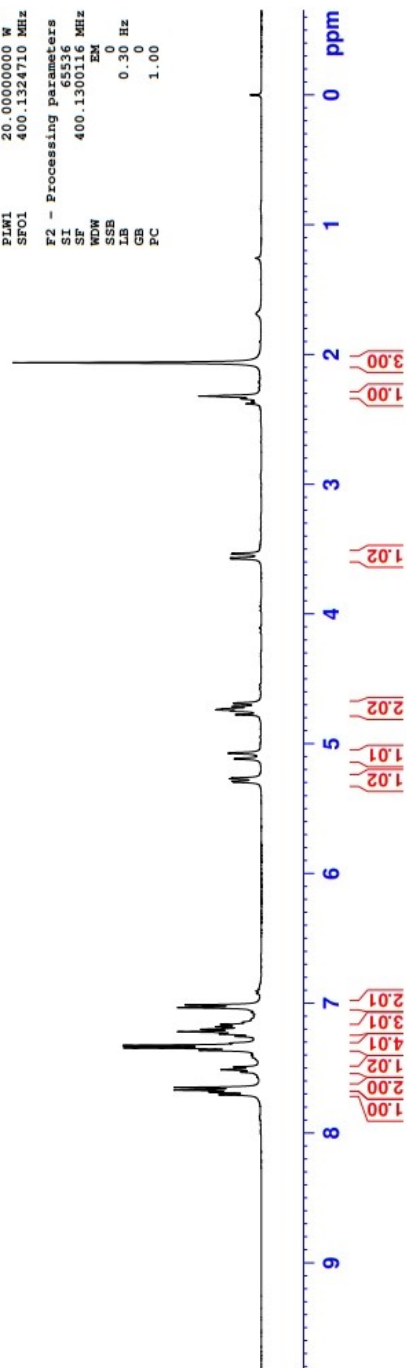

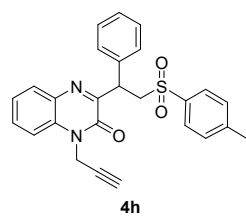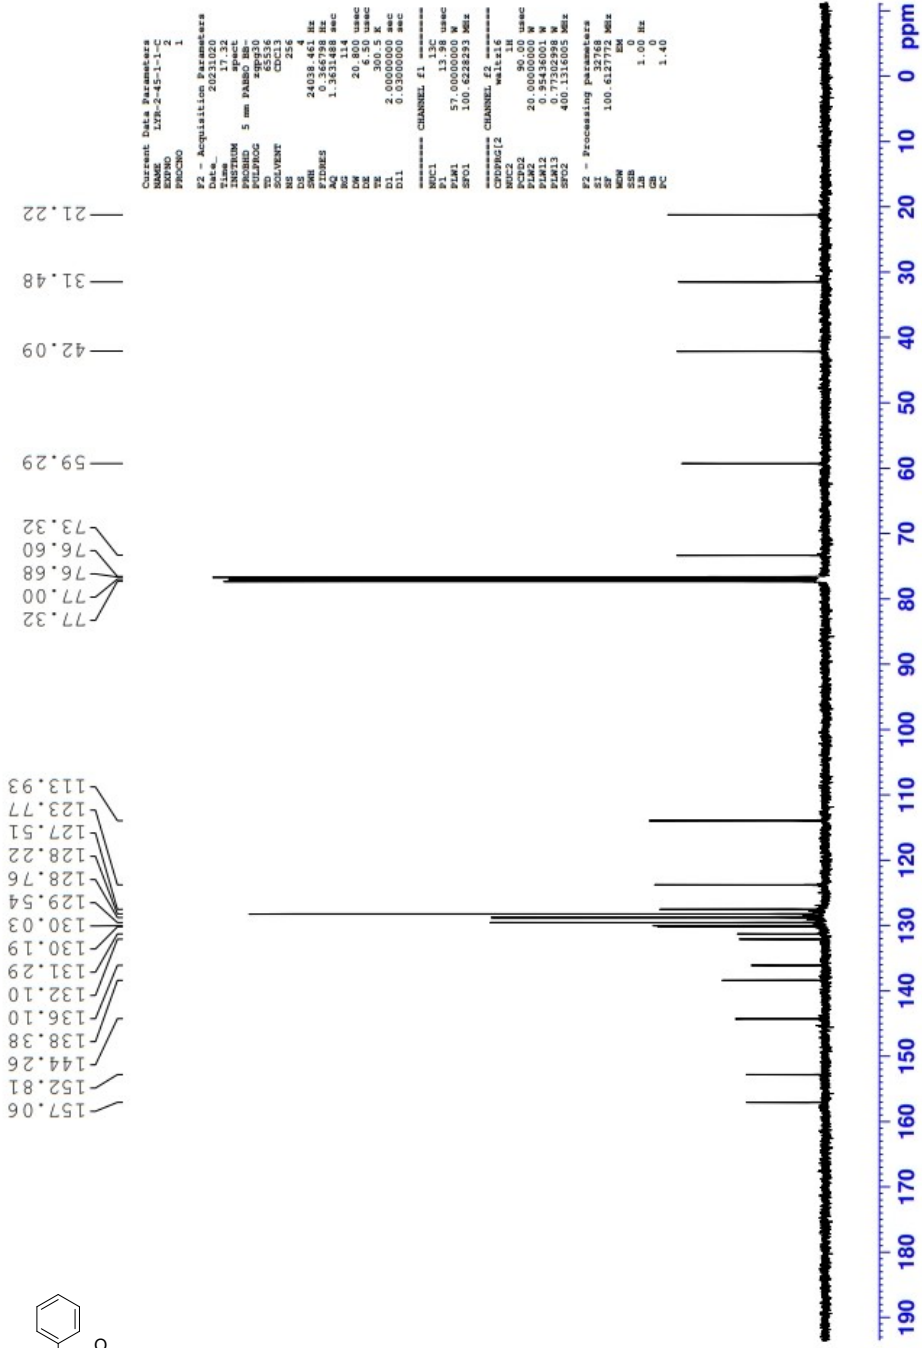

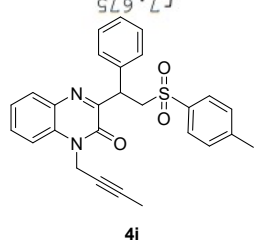

7.675  
7.654  
7.530  
7.527  
7.509  
7.491  
7.488  
7.384  
7.363  
7.349  
7.330  
7.317  
7.259  
7.238  
7.234  
7.221  
7.202  
7.183  
7.165  
7.028  
7.007  
5.297  
5.291  
5.271  
5.265  
5.035  
5.029  
4.992  
4.986  
4.750  
4.740  
4.714  
4.704  
4.698  
4.656  
3.578  
3.571  
3.542  
3.535  
2.067  
1.799

Current Data Parameters  
 NAME LXR-2-74-2-H  
 EXPNO 1  
 PROCNO 1

F2 - Acquisition Parameters  
 Date\_ 20231130  
 Time 16.36  
 INSTRUM spect  
 PROBHD 5 mm PABBO BE-  
 PULPROG zg30  
 TD 65536  
 RS 12  
 SOLVENT CDCl3  
 SPH 8223.685 Hz  
 SF 0.125483 Hz  
 FIDRES 3.9845889 sec  
 AQ 114  
 RG 60.800 use  
 DE 6.50 use  
 TE 295.4 K  
 D1 1.00000000 sec

===== CHANNEL f1 =====  
 NUCL1 13  
 LH 99.66 use  
 P1 20.00000000 Hz  
 SFO1 400.1324710 MHz

F2 - Processing Parameters  
 SI 65536  
 SF 400.1300106 MHz  
 WDW EM  
 SSB 0  
 LB 0.30 Hz  
 GB 0  
 PC 1.00

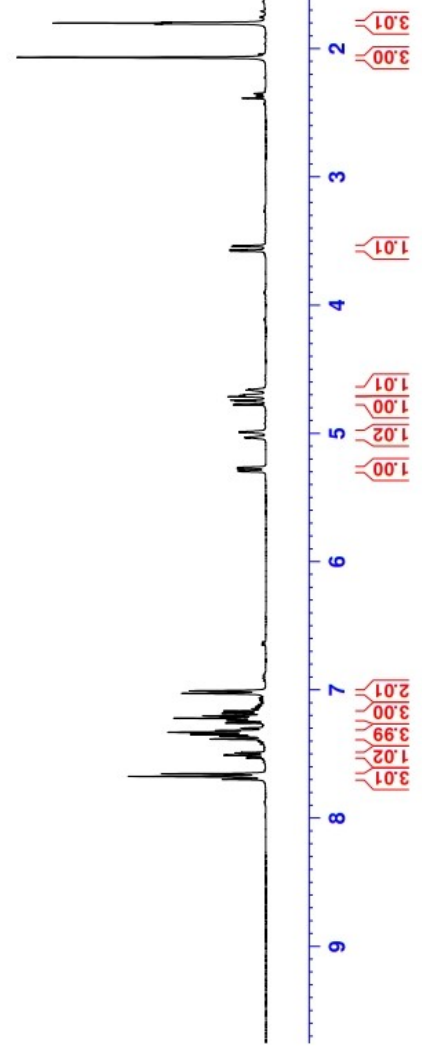

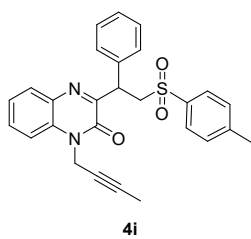

157.11  
152.88  
144.22  
138.47  
136.09  
132.12  
131.51  
130.08  
129.92  
129.50  
128.74  
128.26  
127.46  
123.56  
114.18

81.06  
77.31  
77.00  
76.68  
71.94  
59.31  
42.04  
32.06  
21.16  
3.61

Current Data Parameters  
NAME LXR-274-Z-C  
EXPNO 1  
PROCNO 1

F2 - Acquisition Parameters  
Date\_ 202310  
Time 11:00:00  
INSTRUM spect  
PROBHD 5 mm PABBO HD-  
PULPROG zgpg30  
TD 65536  
SOLVENT CDCl3  
DS 1024  
SS 1024  
SMR 24038.461 Hz  
AQ 0.267988 sec  
RG 144  
RW 1.281114 sec  
DW 20.800 usec  
DE 0.000000 usec  
TE 296.8 K  
D1 2.00000000 sec  
D11 0.03000000 sec

===== CHANNEL f1 =====  
NUC1 13C  
P1 13.00 usec  
PL1 57.00000000 M  
SFO1 100.6282893 MHz

===== CHANNEL f2 =====  
CROSSPO2 wait4.16  
NUC2 1H  
PCPD2 90.00 usec  
PLM2 20.00000000 M  
PLM3 0.00000000 M  
PLM4 0.7302988 M  
SFO2 400.1316005 MHz

F2 - Processing parameters  
SI 32768  
SF 100.612765 MHz  
WDW EM  
SSB 0  
LB 1.00 Hz  
GB 0  
PC 1.40

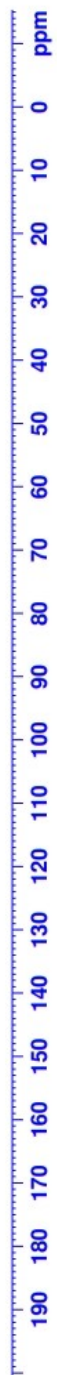

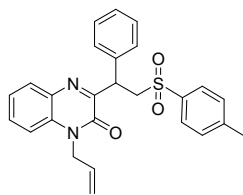

4j

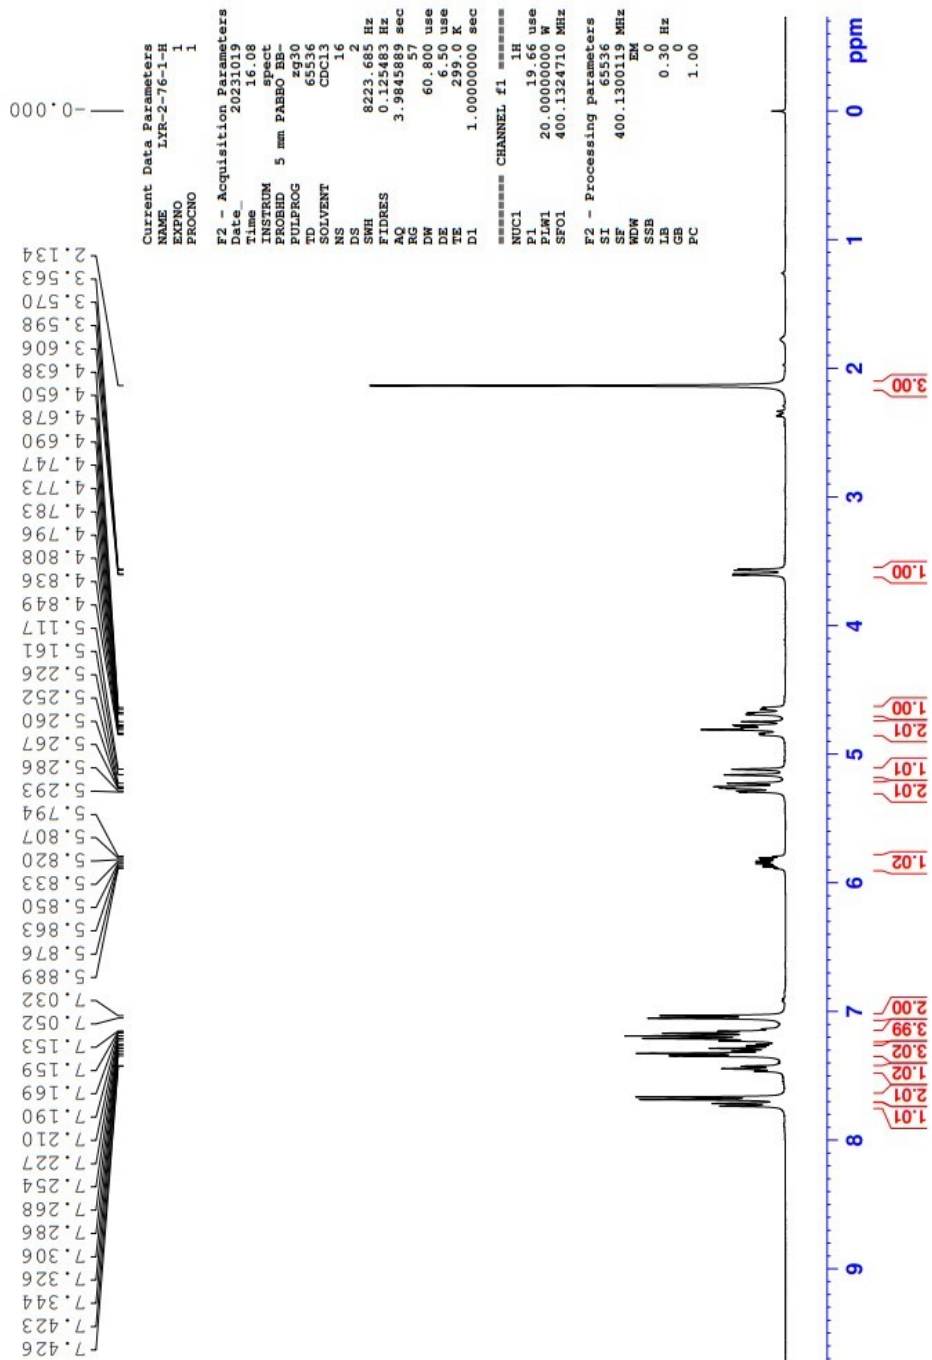

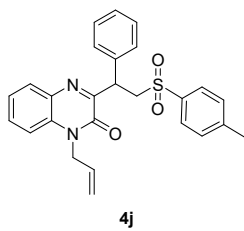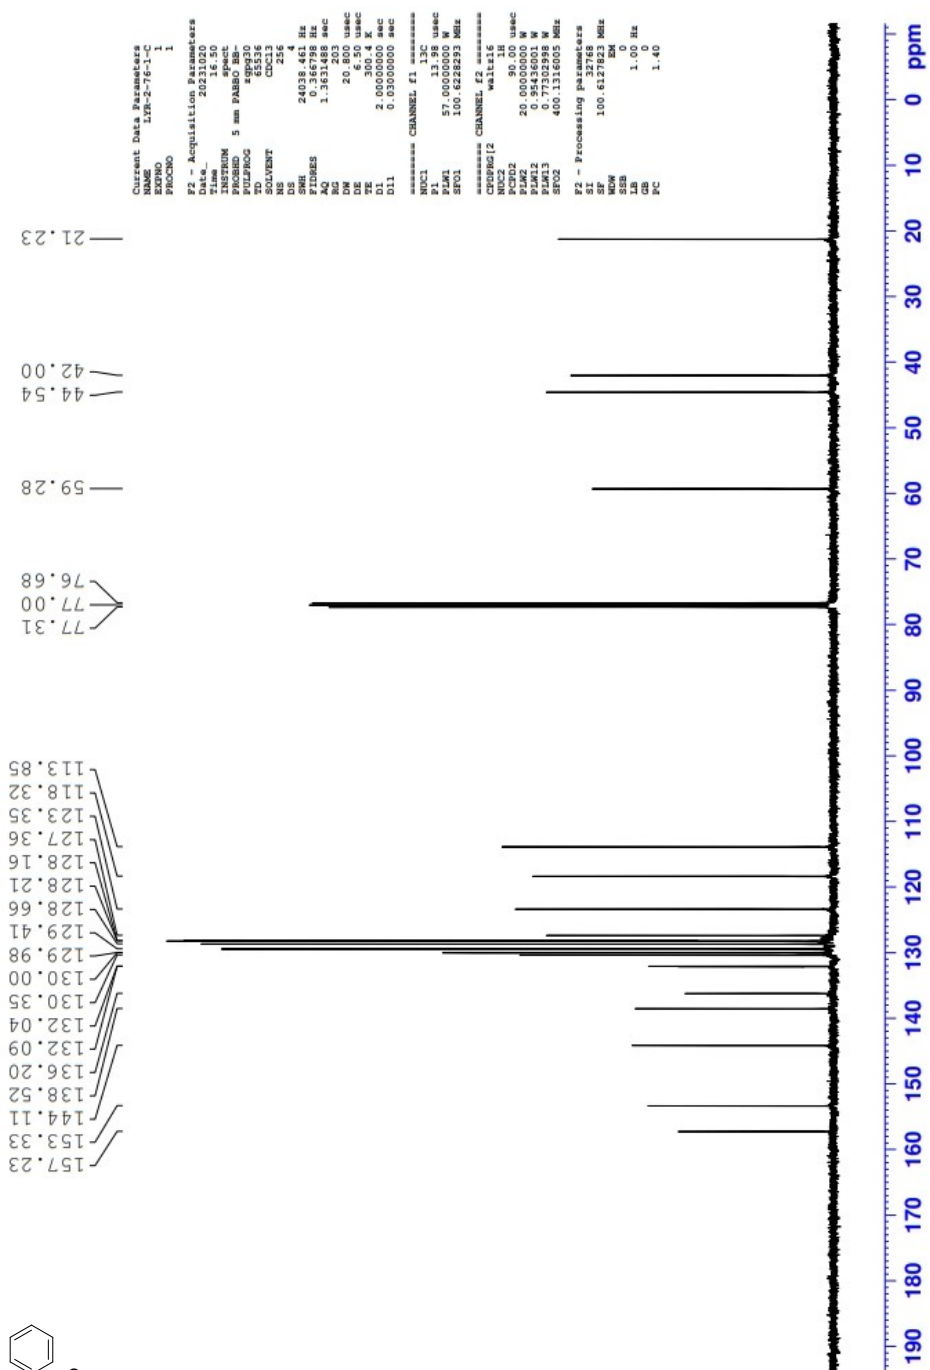

Current Data Parameters  
 NAME LYN-276-1-C  
 PROCNO 1

F2 - Acquisition Parameters  
 Date\_ 20231020  
 Time 16:50  
 INSTRUM spect  
 PROBNM 5 mm PABBO BB-  
 PULPROG zgpg30  
 DT 0.0500000  
 SOLVENT CDCl3  
 NS 256  
 DS 4  
 DE 24038.40 Hz  
 FIDRES 0.366798 Hz  
 AQ 1.3631488 sec  
 DP 20.800  
 DW 20.800 usec  
 DE 6.50 usec  
 TE 300.2 K  
 D1 2.00000000 sec  
 D11 0.03000000 sec

===== CHANNEL f1 =====  
 NUCL1 13C  
 P1 13.28 usec  
 PL1 0.00 dB  
 SFO1 100.628263 MHz

===== CHANNEL f2 =====  
 CHOPPING12 wa3x15  
 NUCL2 1H  
 P2 7.00 usec  
 PL2 0.00 dB  
 SFO2 20.000000 MHz  
 PAM12 0.95436001 W  
 PAM13 0.77302988 W  
 SFO3 400.13605 MHz

F2 - Processing parameters  
 F 270.13605 MHz  
 SF 100.628263 MHz  
 EQ 1.00 Hz  
 GB 0  
 PC 1.40





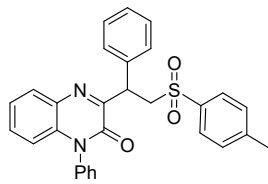

4k

158.11  
153.56  
144.26  
138.45  
136.33  
135.54  
133.70  
131.95  
130.20  
129.77  
129.57  
129.38  
128.74  
128.39  
128.36  
128.20  
127.89  
127.44  
123.62  
115.22

77.31  
77.00  
76.68

21.38

42.10

59.24

Current Data Parameters  
NAME LTR-2-82-1-3-C  
EXPNO 1  
PROCNO 1

F2 - Acquisition Parameters  
Date\_ 20231128  
Time 17.02  
Pulseprog zgpg30  
PROBHD 5 mm PABBO BBO  
PULPROG zgpg30  
PCPDPRG2  
SOLVENT CDCl3  
NS 256  
DS 4  
SS 24038.464 Hz  
FTRES 0.366798 Hz  
AQ 1.3631488 sec  
SFO1 100.622893 MHz  
DM 800 usec  
DE 6.50 usec  
TE 300.2 K  
D1 2.0000000 sec  
D11 0.0300000 sec

===== CHANNEL f1 =====  
NUC1 13C  
P1 13.98 usec  
PL1 57.000000 MHz  
SFO1 100.622893 MHz

===== CHANNEL f2 =====  
CPDPRG2 waltz16  
NUC2 1H  
P2 1.00 usec  
PL2 20.000000 MHz  
PL12 0.95436001 W  
PL13 0.7730298 W  
PL14 489.318085 MHz

F2 - Processing parameters  
S 2  
SF 100.6127150 MHz  
WDW EM  
SS 32768  
GB 1.00 Hz  
PC 1.40

190 180 170 160 150 140 130 120 110 100 90 80 70 60 50 40 30 20 10 0 ppm

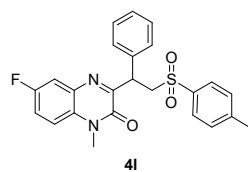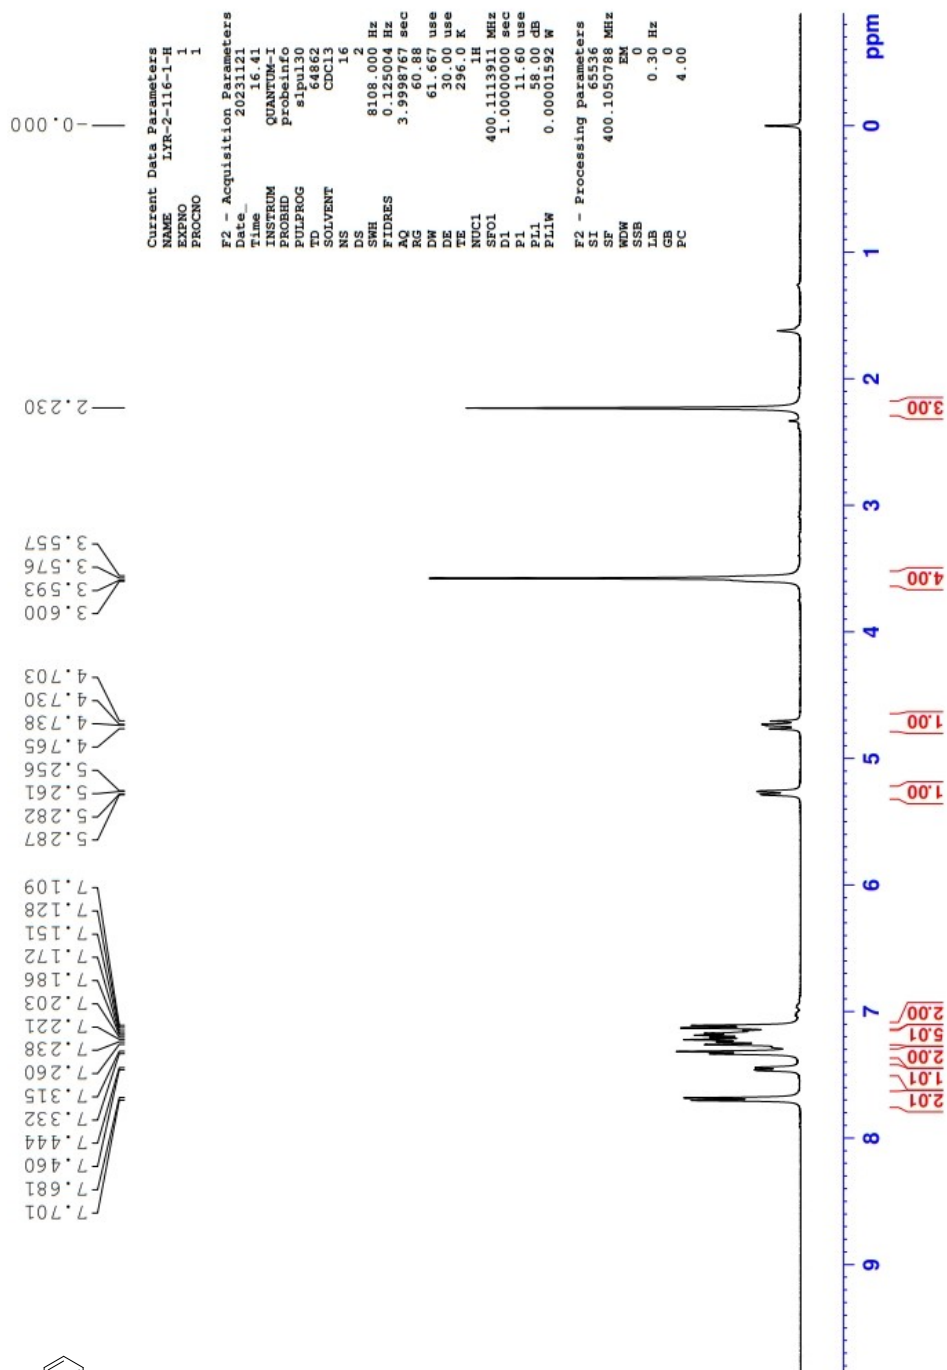

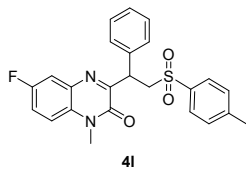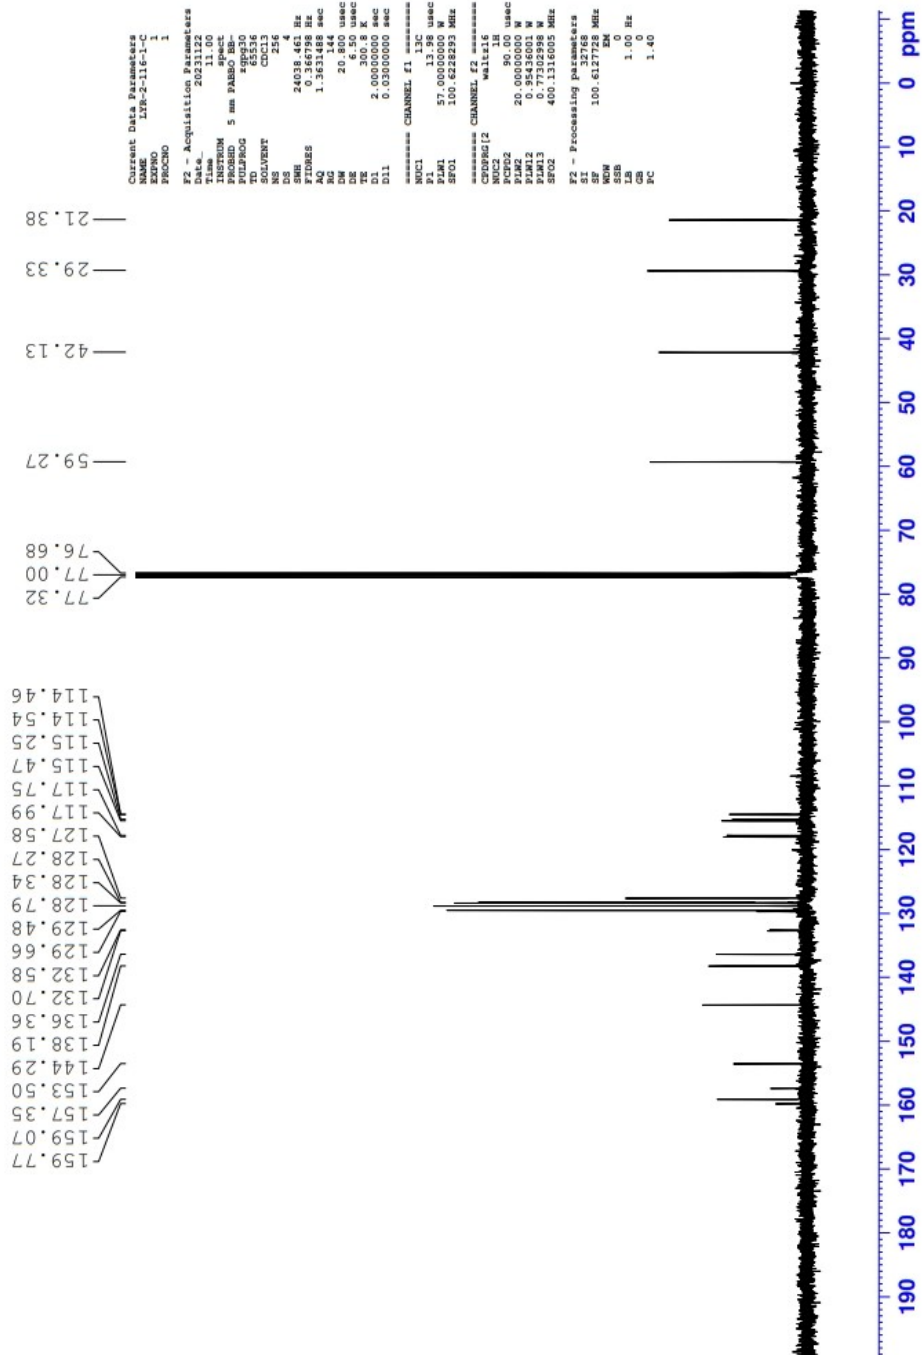

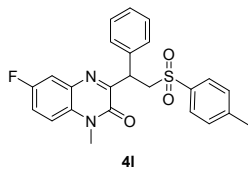

—118.97

```

Current Data Parameters
NAME      LXR-2-116-1-F
EXPNO    1
PROCNO   1

F2 - Acquisition Parameters
Date_    20231122
Time     10.44
INSTRUM  spect
PROBHD   5 mm PABBO BB
PULPROG  zgpg30
TD        131072
SOLVENT  CDCl3
NS        16
DS        4
SWH       89285.711 Hz
FIDRES    0.681196 Hz
AQ         0.7340032 sec
RG         5.203
RW         5.600 use
DE         300 use
TE         300.2 K
D1         1.00000000 sec
D11        0.03000000 sec
D12        0.00002000 sec

===== CHANNEL f1 =====
NUC1      19F
P1        23.17 use
PLM1      18.19700050 W
SFO1      376.4607164 MHz

===== CHANNEL f2 =====
CPDPRG2  waltz16
NUC2
P2        90.00 use
PLM2      20.00000000 W
SFO2      400.1316005 MHz

F2 - Processing parameters
SI         65536
SF         376.4983660 MHz
WDW        EM
SSB        0
LB         0.30 Hz
GB         0
PC         1.00
  
```

-40 -60 -80 -100 -120 -140 -160 -180 -200 ppm

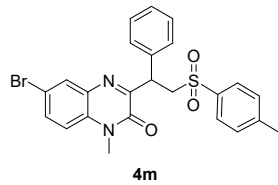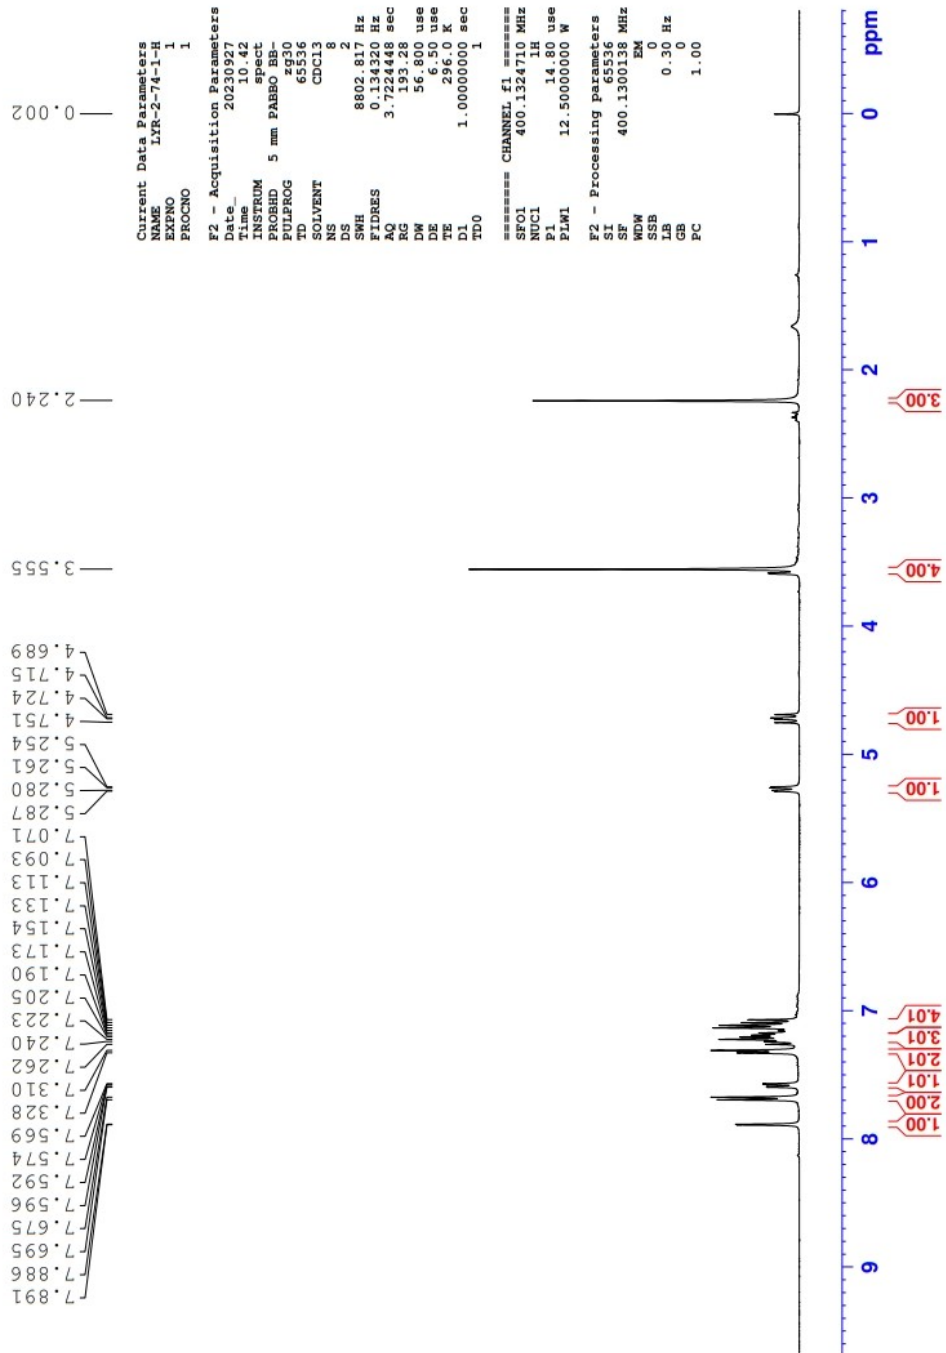

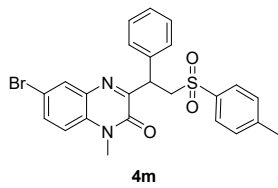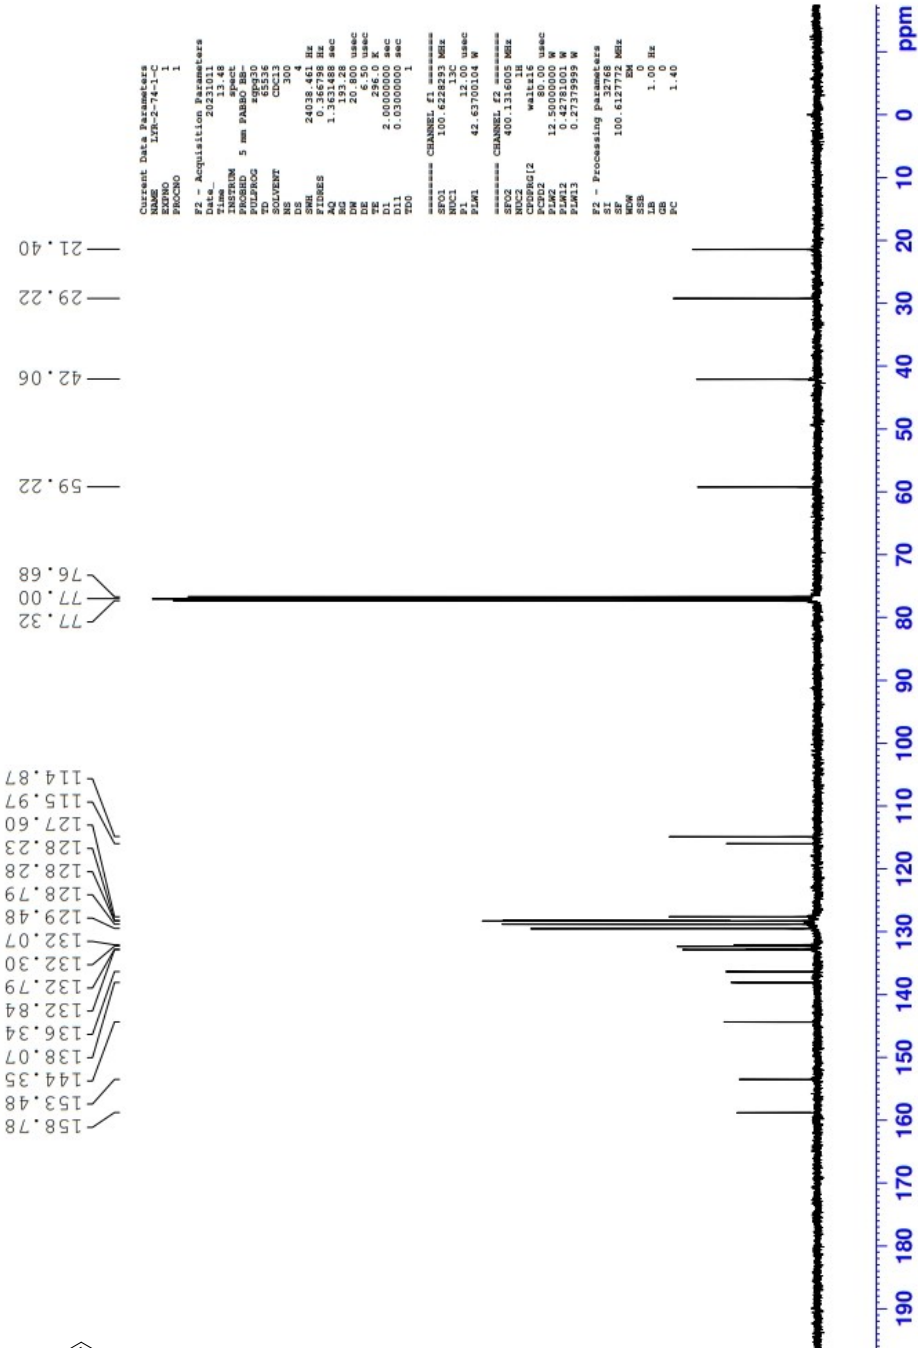

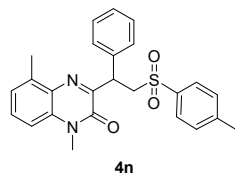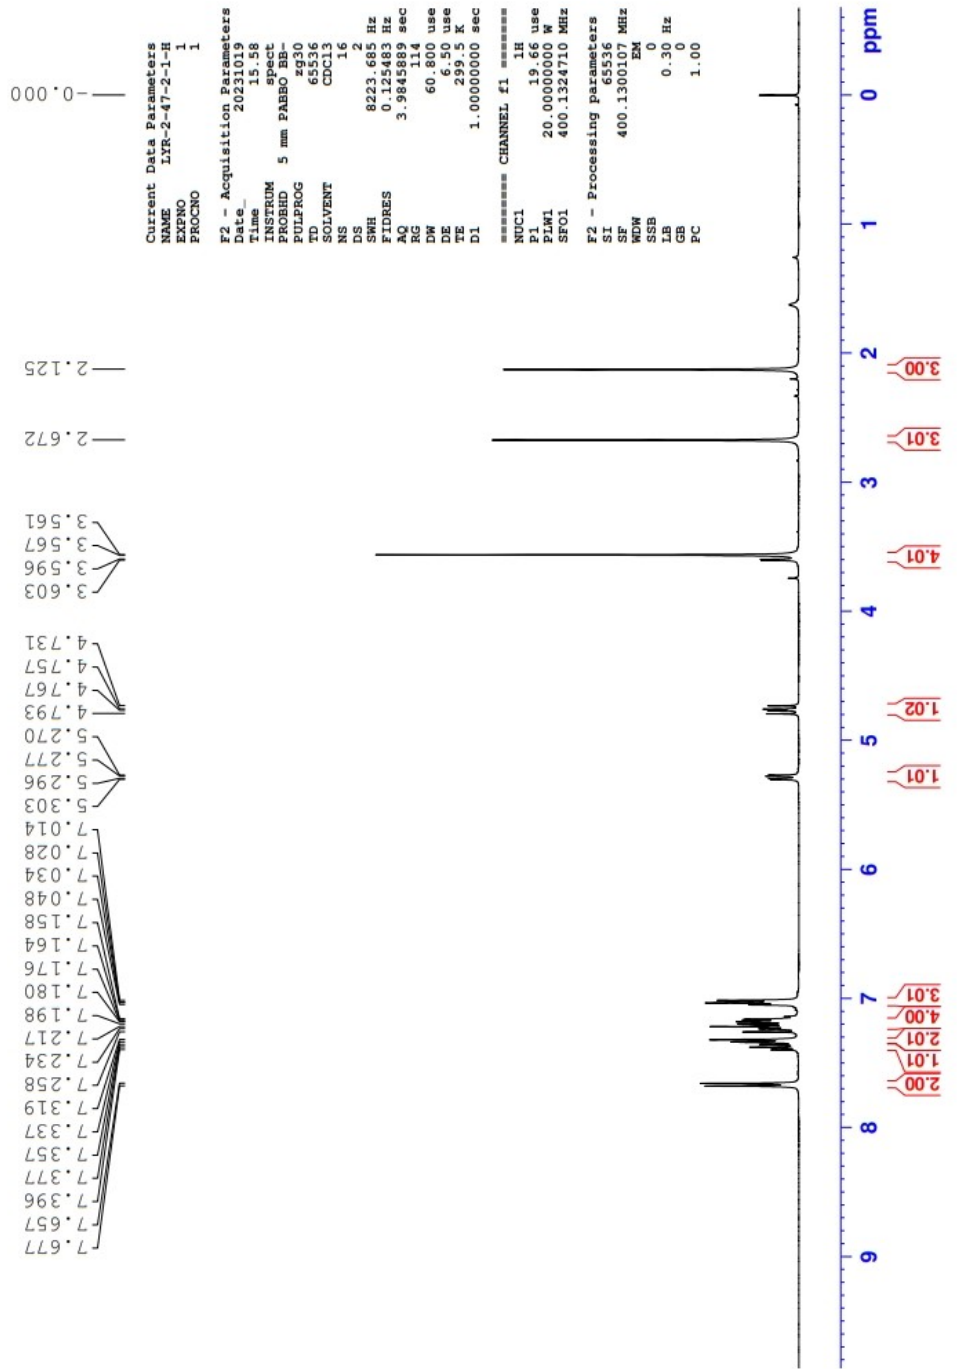

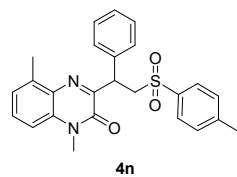

111.32  
124.82  
127.40  
128.25  
128.29  
128.74  
129.28  
130.01  
130.54  
133.02  
136.19  
138.41  
138.68  
138.68  
144.26  
153.74  
155.39

17.52  
21.28  
29.17  
42.11  
59.65  
76.68  
77.00  
77.32

```

Current Data Parameters
NAME      21R-2-47-2-1-1
EXPNO    1
PROCNO   1
=====
F2 - Acquisition Parameters
Date_    20231020
Time     14.07
INSTRUM  spect
PROBHD   5 mm PABBO BB-
PULPROG  zgpg30
SOLVENT  CDCl3
NS       256
DS       4
SWH      24038.461 Hz
FIDRES   0.266798 Hz
AQ       1.363114 sec
RG       327.5
DM       20.800 usec
DE       0.950 usec
TE       298.2 K
D1       2.00000000 sec
D11      0.03000000 sec
===== CHANNEL f1 =====
NUC1      13C
P1        13.00 usec
PL1       0.00000000 W
SFO1      100.628393 MHz
===== CHANNEL f2 =====
CPDPRG2  waltz16
NUC2      13C
P2        90.00 usec
PL2       20.00000000 W
SFO2      100.628393 MHz
===== CHANNEL f3 =====
CPDPRG3  waltz16
NUC3      13C
P3        90.00 usec
PL3       20.00000000 W
SFO3      100.628393 MHz
===== CHANNEL f4 =====
CPDPRG4  waltz16
NUC4      13C
P4        90.00 usec
PL4       20.00000000 W
SFO4      100.628393 MHz
=====
F2 - Processing parameters
SI       32768
SF       100.612736 MHz
WDW      EM
SSB      0
LB       0.00 Hz
GB       0
PC       1.40
  
```

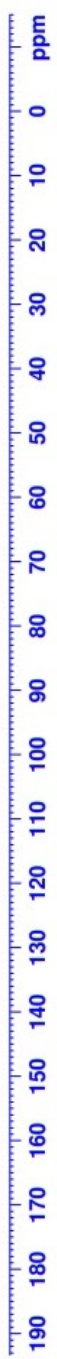



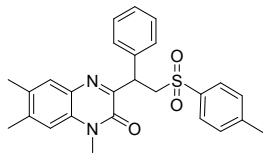

4o

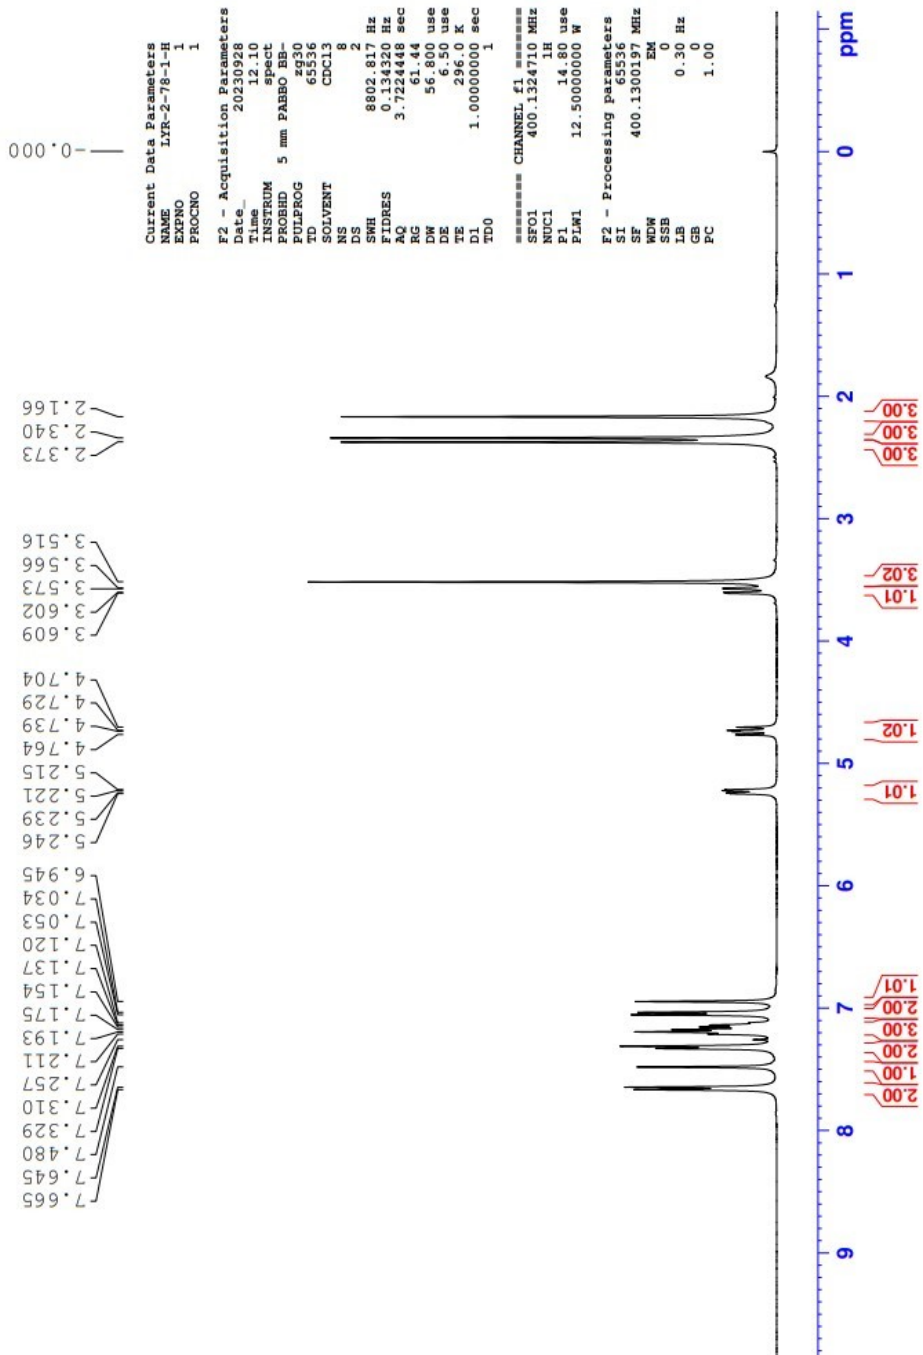

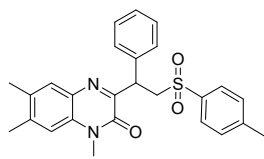

4o

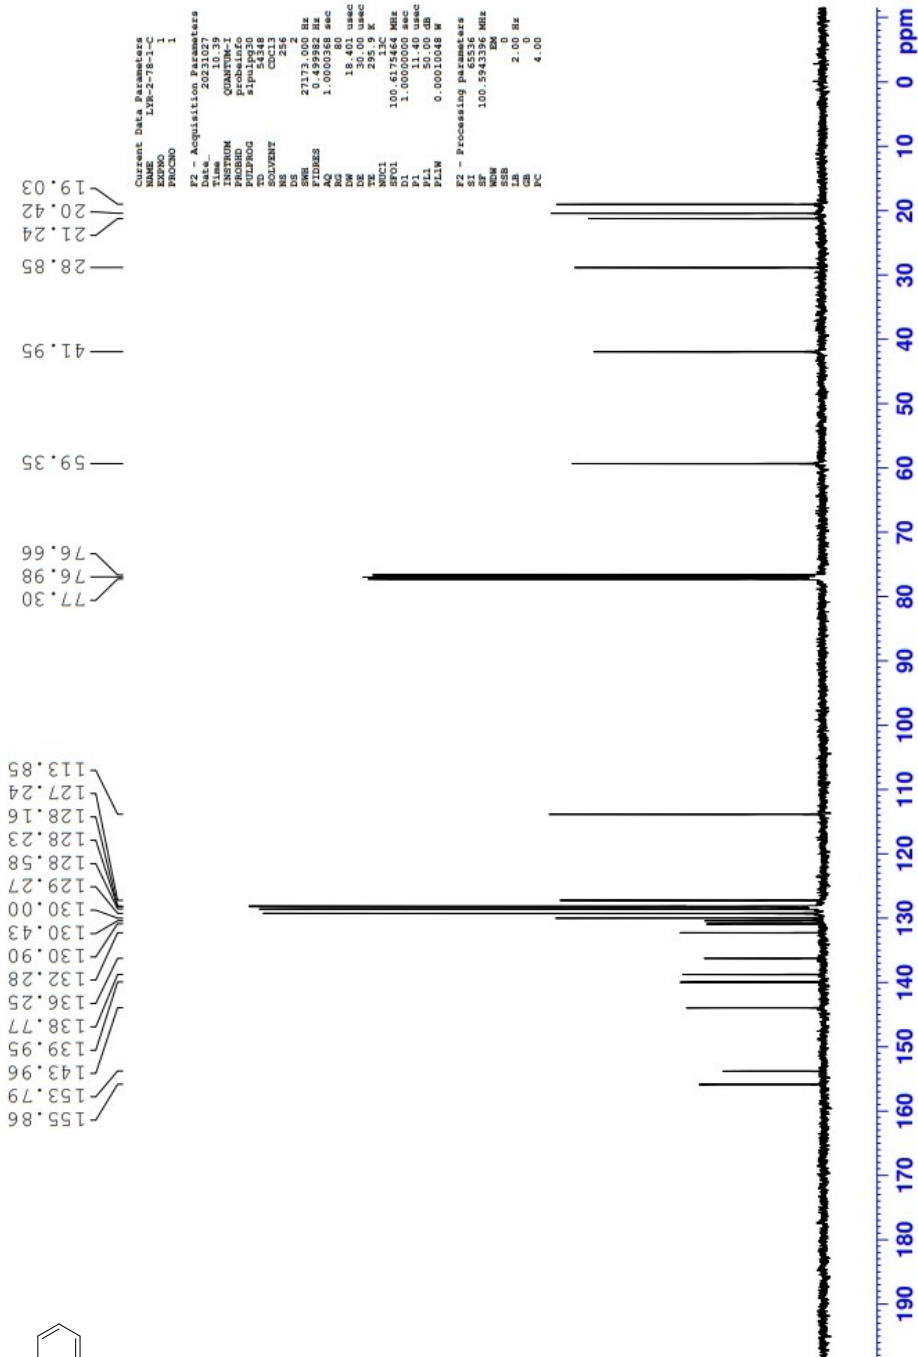

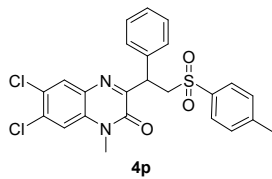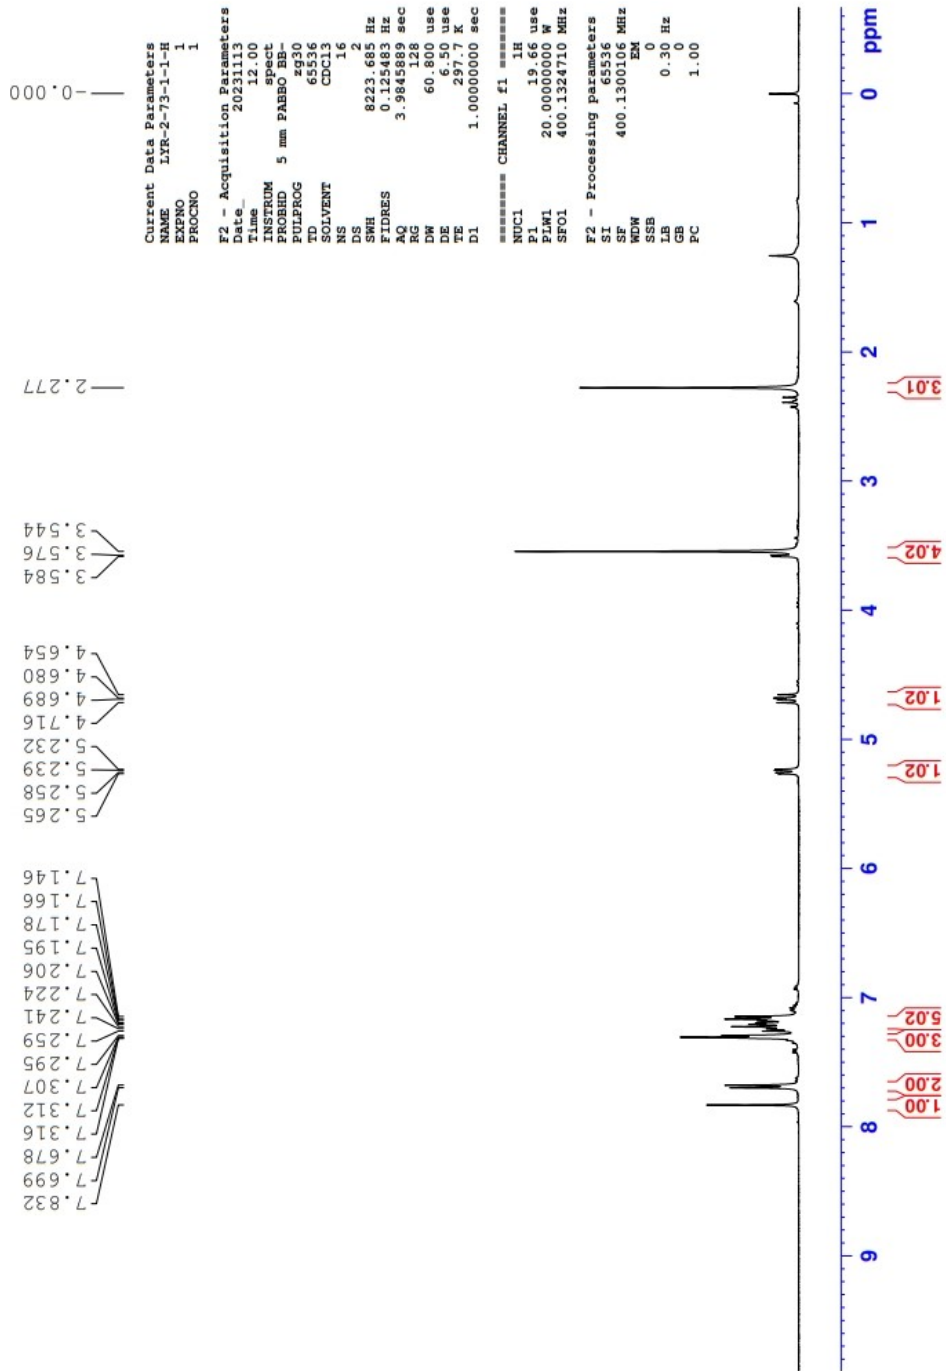

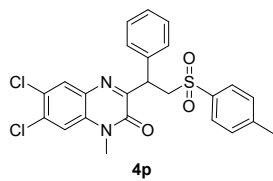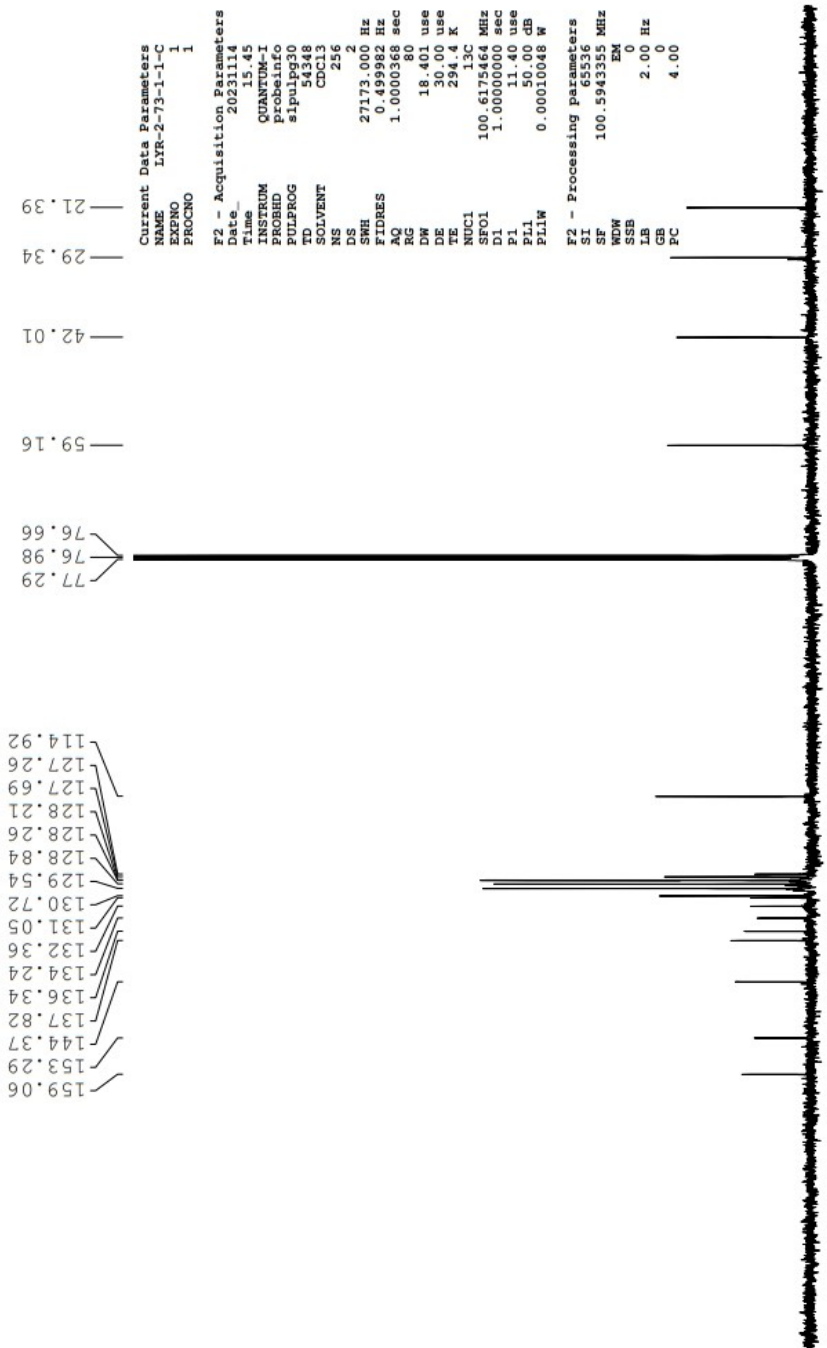

Current Data Parameters  
 NAME: EYR-2-73-1-1-C  
 EXPNO: 1  
 PROCNO: 1

F2 - Acquisition Parameters  
 Date\_ : 20231114  
 Time\_ : 15.45  
 INSTRUM: QNPANTUM-I  
 PROBED: probeinfo  
 PULPROG: sipulpg30  
 TD: 54348  
 SOLVENT: CDCl3  
 NS: 256  
 DS: 4  
 SWH: 27173.000 Hz  
 SF: 0.499982 Hz  
 FIDRES: 1.0000368 sec  
 AQ: 80  
 RG: 18.401 use  
 DE: 30.00 use  
 TE: 294.4 K  
 NUC1: 13C  
 SFO1: 100.6175464 MHz  
 D1: 1.0000000 sec  
 F1: 11.40 use  
 FL1: 50.00 GB  
 FLLW: 0.00010048 W

F2 - Processing Parameters  
 SI: 65536  
 SF: 100.5943355 MHz  
 WDW: EM  
 SSB: 0  
 LB: 2.00 Hz  
 GB: 0  
 PC: 4.00

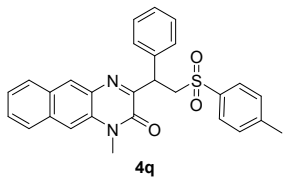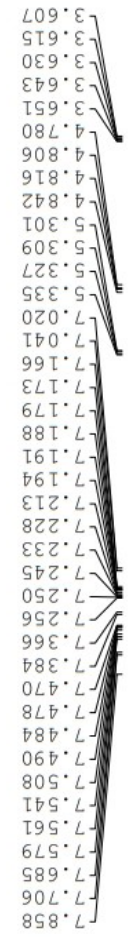

Current Data Parameters  
 NAME LXR-2-94-1-H  
 EXPNO 1  
 PROCNO 1

F2 - Acquisition Parameters  
 Date\_ 20231113  
 Time 12.14  
 INSTRUM spect  
 PROBHD 5 mm PABBO BB-  
 PULPROG zg30  
 ID 65536  
 SOLVENT CDCl3  
 NS 12  
 DS 2  
 SMH 8223.685 Hz  
 FIDRES 0.125483 Hz  
 AQ 3.9845889 sec  
 RG 128  
 DW 60.800 use  
 DE 6.50 use  
 TE 297.7 K  
 D1 1.0000000 sec

===== CHANNEL f1 =====  
 NUC1 1H  
 P1 19.46 use  
 PL1 20.0000000 W  
 SF01 400.1324710 MHz

F2 - Processing parameters  
 SI 65536  
 SF 400.1300117 MHz  
 WDW EM  
 SSB 0  
 LB 0.30 Hz  
 GB 0  
 PC 1.00

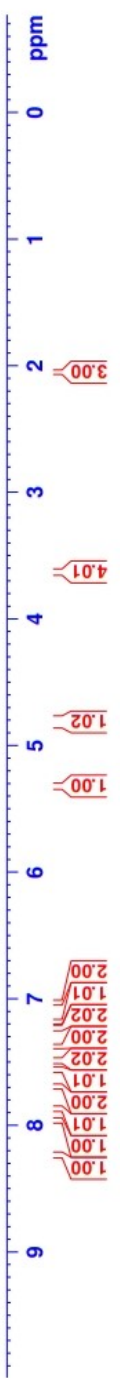

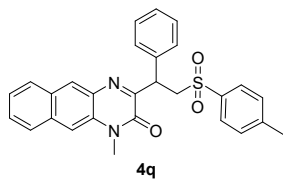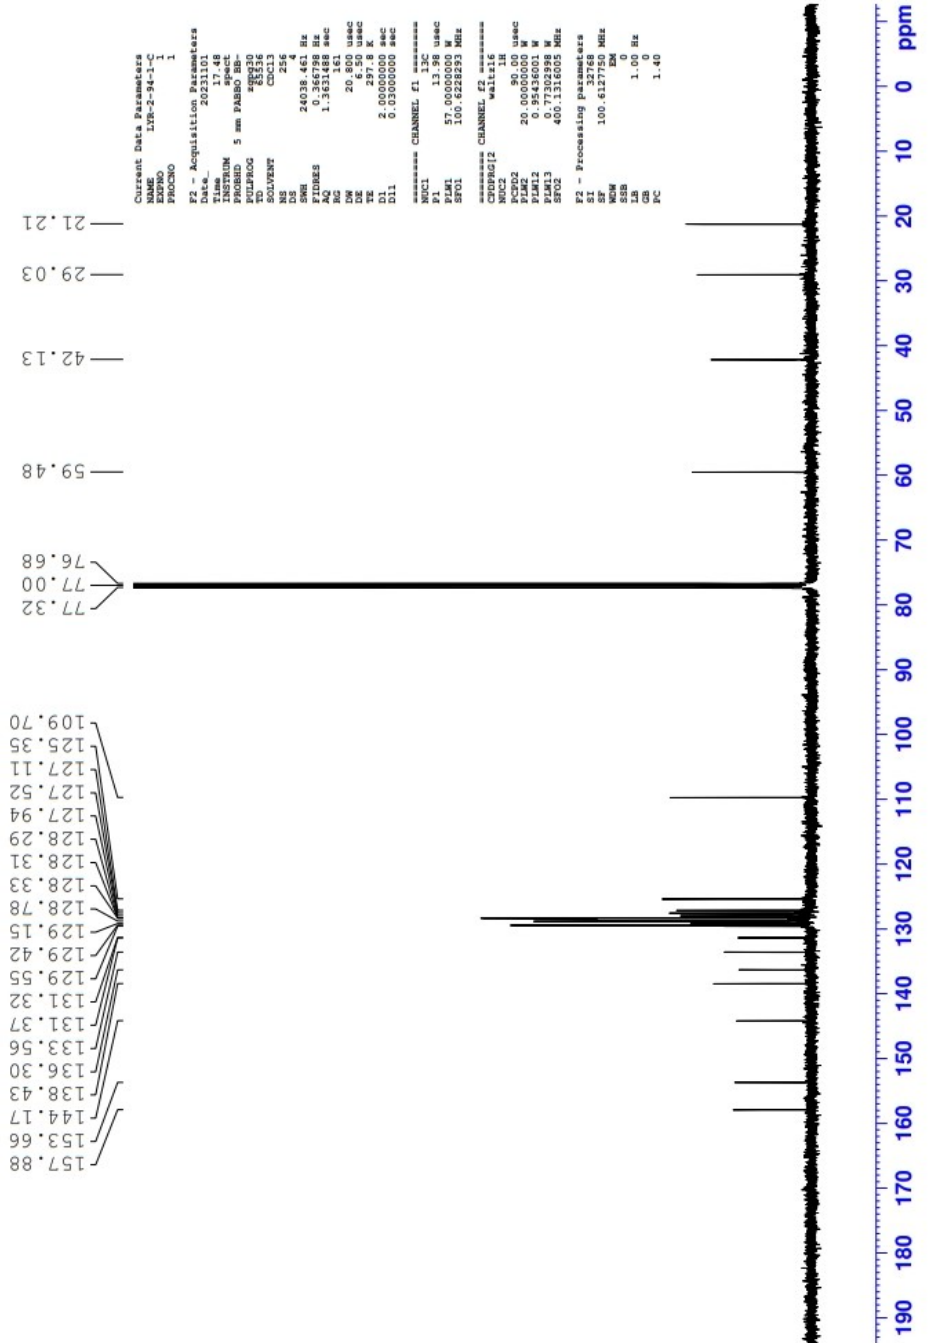

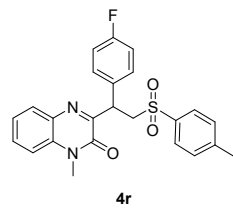

7.734  
7.673  
7.653  
7.540  
7.537  
7.519  
7.501  
7.498  
7.354  
7.352  
7.334  
7.323  
7.317  
7.310  
7.301  
7.293  
7.288  
7.261  
7.228  
7.207  
7.082  
7.062  
6.913  
6.891  
6.870  
5.265  
5.255  
5.240  
5.231  
4.714  
4.690  
4.678  
4.654  
3.620  
3.610  
3.582  
3.575

2.191

0.000

Current Data Parameters  
 NAME LXR-2-31-1-H  
 EXPNO 1  
 PROCNO 1  
 F2 - Acquisition Parameters  
 Date\_ 20231113  
 Time 12.05  
 INSTRUM spect  
 PROBRD 5 mm PABBO BB-  
 PULPROG zg30  
 TD 65536  
 SOLVENT CDCl3  
 NS 16  
 DS 2  
 SWH 8223.685 Hz  
 FIDRES 0.125483 Hz  
 AQ 3.9845889 sec  
 RG 60.161 use  
 DW 6.50 use  
 DE 297.6 K  
 TE 297.6 K  
 D1 1.00000000 sec  
 ===== CHANNEL f1 =====  
 NUC1 1H  
 P1 19.66 use  
 PLW1 20.0000000 W  
 SFO1 400.1324710 MHz  
 F2 - Processing parameters  
 SI 65536  
 SF 400.1300097 MHz  
 EQ 20  
 SSB 0  
 LB 0.30 Hz  
 GB 0  
 PC 1.00

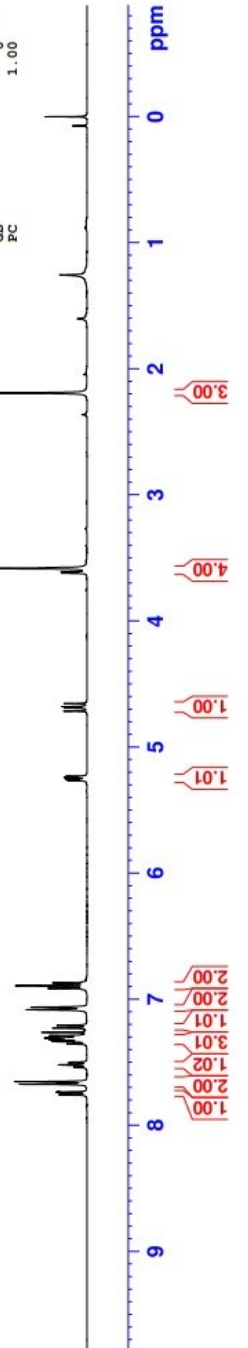

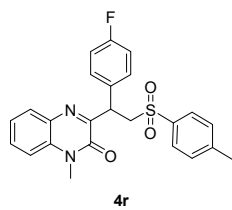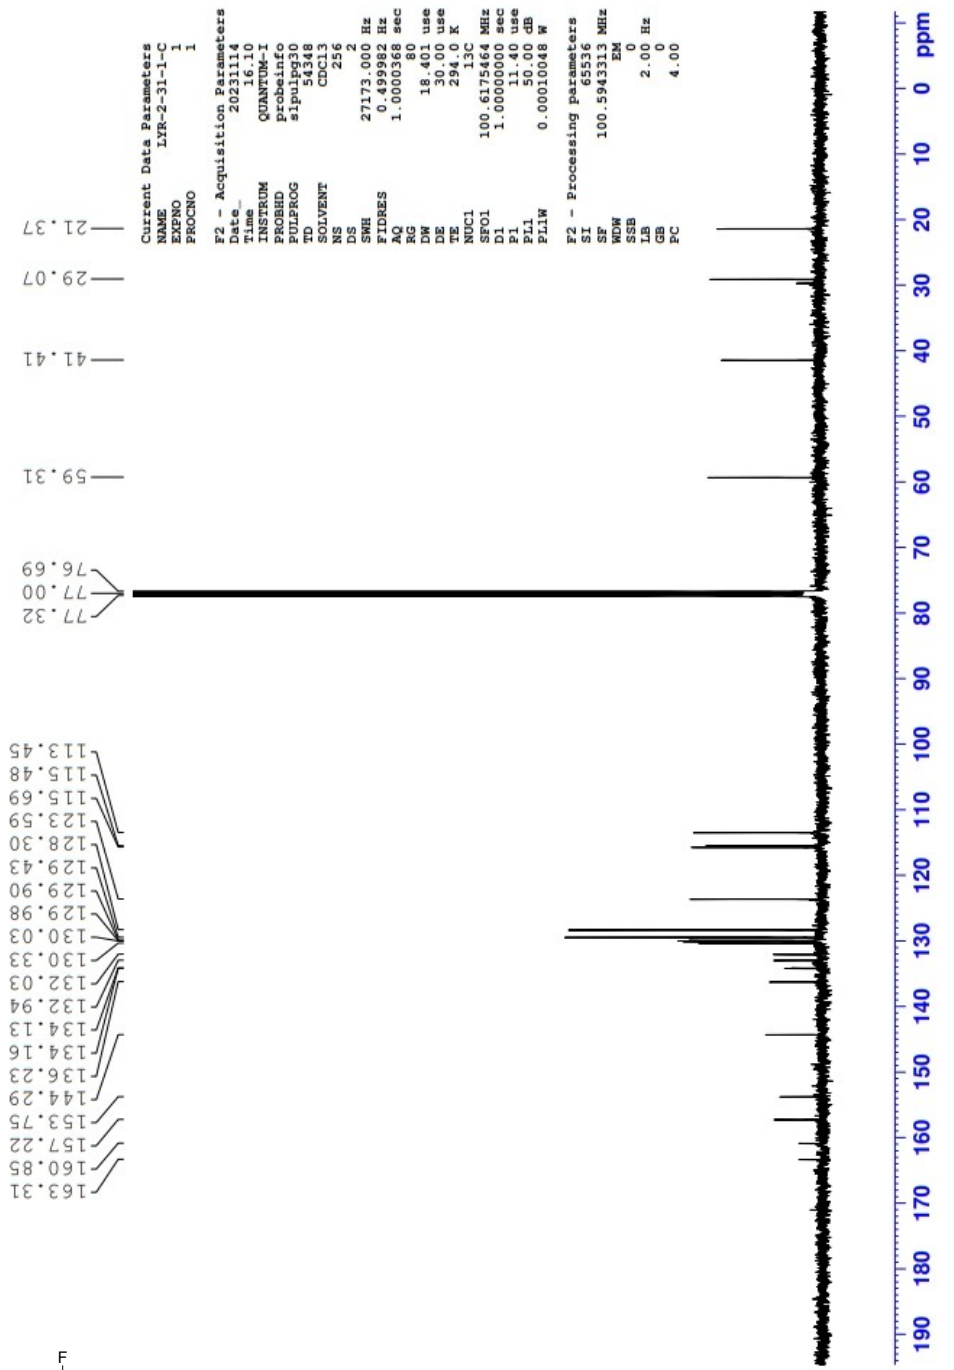



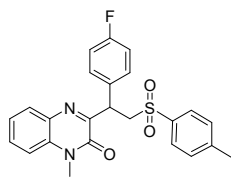

4r

---114.77

```

Current Data Parameters
NAME      LYR-2-31-1-F
EXPNO    1
PROCNO   1

F2 - Acquisition Parameters
Date_    20231115
Time     10.46
INSTRUM  spect
PROBHD   5 mm PABBO BB-
PULPROG  zgfg1gqh
TD        131072
SOLVENT  CDCl3
NS        16
DS        4
SWH       89285.711 Hz
FIDRES   0.681196 Hz
AQ        0.7340032 sec
RG         512
DE        5.600 use
TE        298.1 K
D1        1.00000000 sec
D11       0.03000000 sec
D12       0.00002000 sec

===== CHANNEL f1 =====
NUC1      19F
P1        23.17 use
PLW1     18.19700050 W
SFO1     376.4607164 MHz

===== CHANNEL f2 =====
CPDPRG2   waltz16
NUC2      13C
PCPD2     90.00 use
PLW2     20.00000000 W
SFO2     0.95436001 W
SFO2     400.1316005 MHz

F2 - Processing parameters
SI        65536
SF        376.4983660 MHz
WDW       EM
SSB       0
LB        0.30 Hz
GB        0
PC        1.00
  
```

-20 -40 -60 -80 -100 -120 -140 -160 -180 -ppm

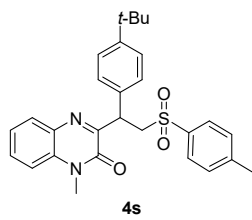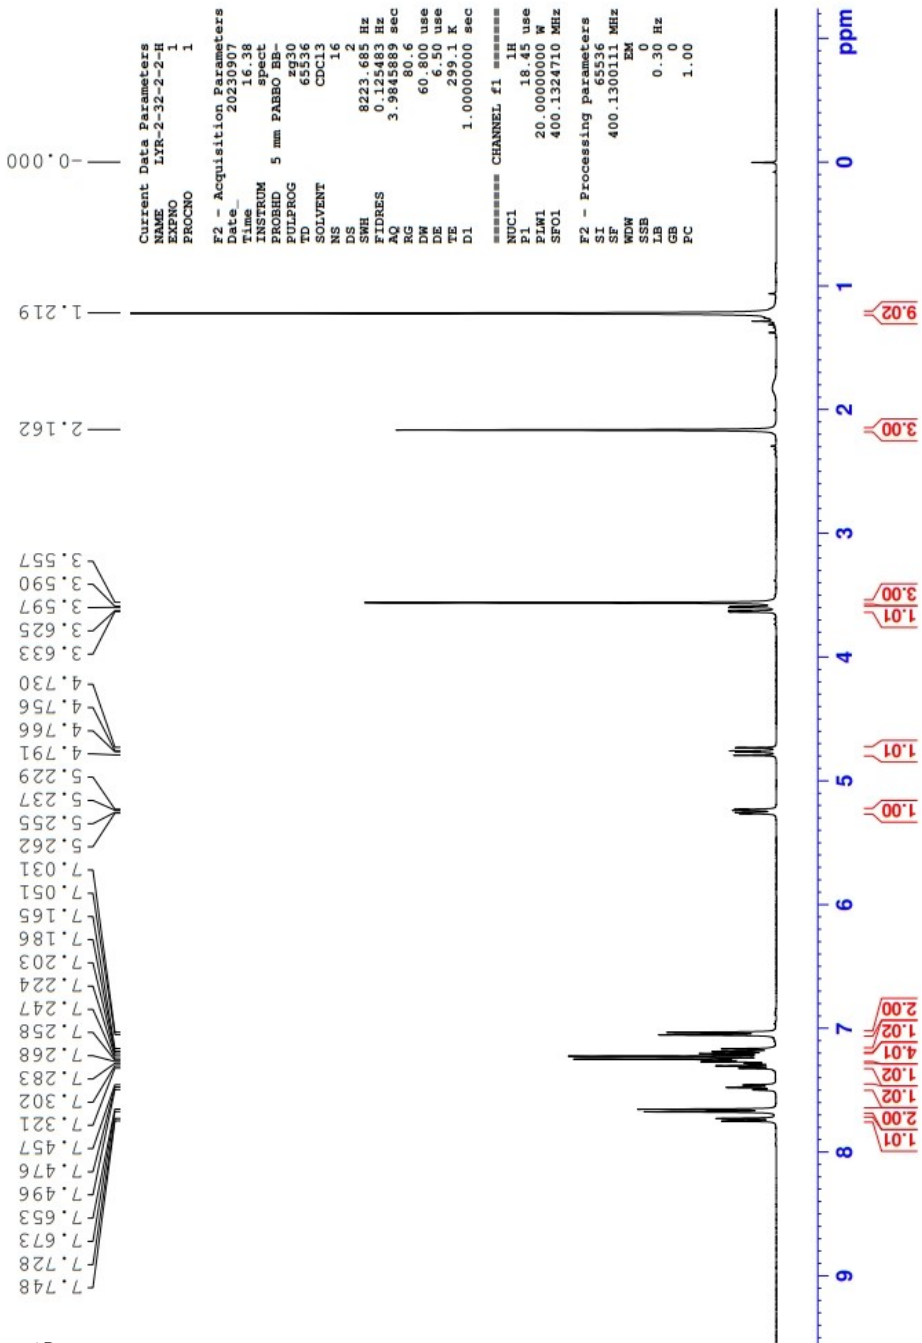

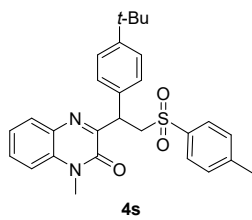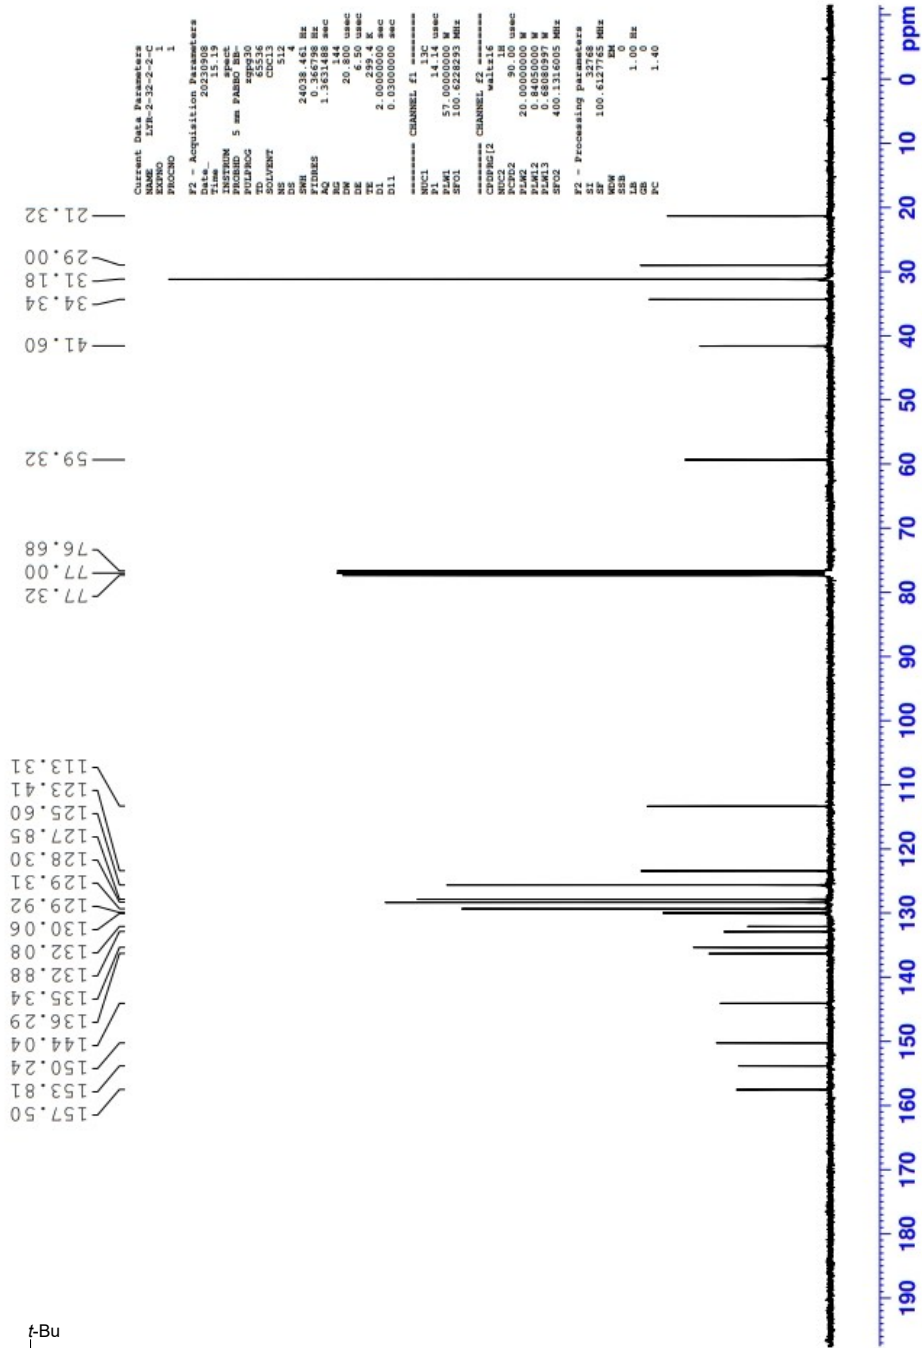

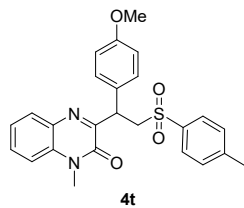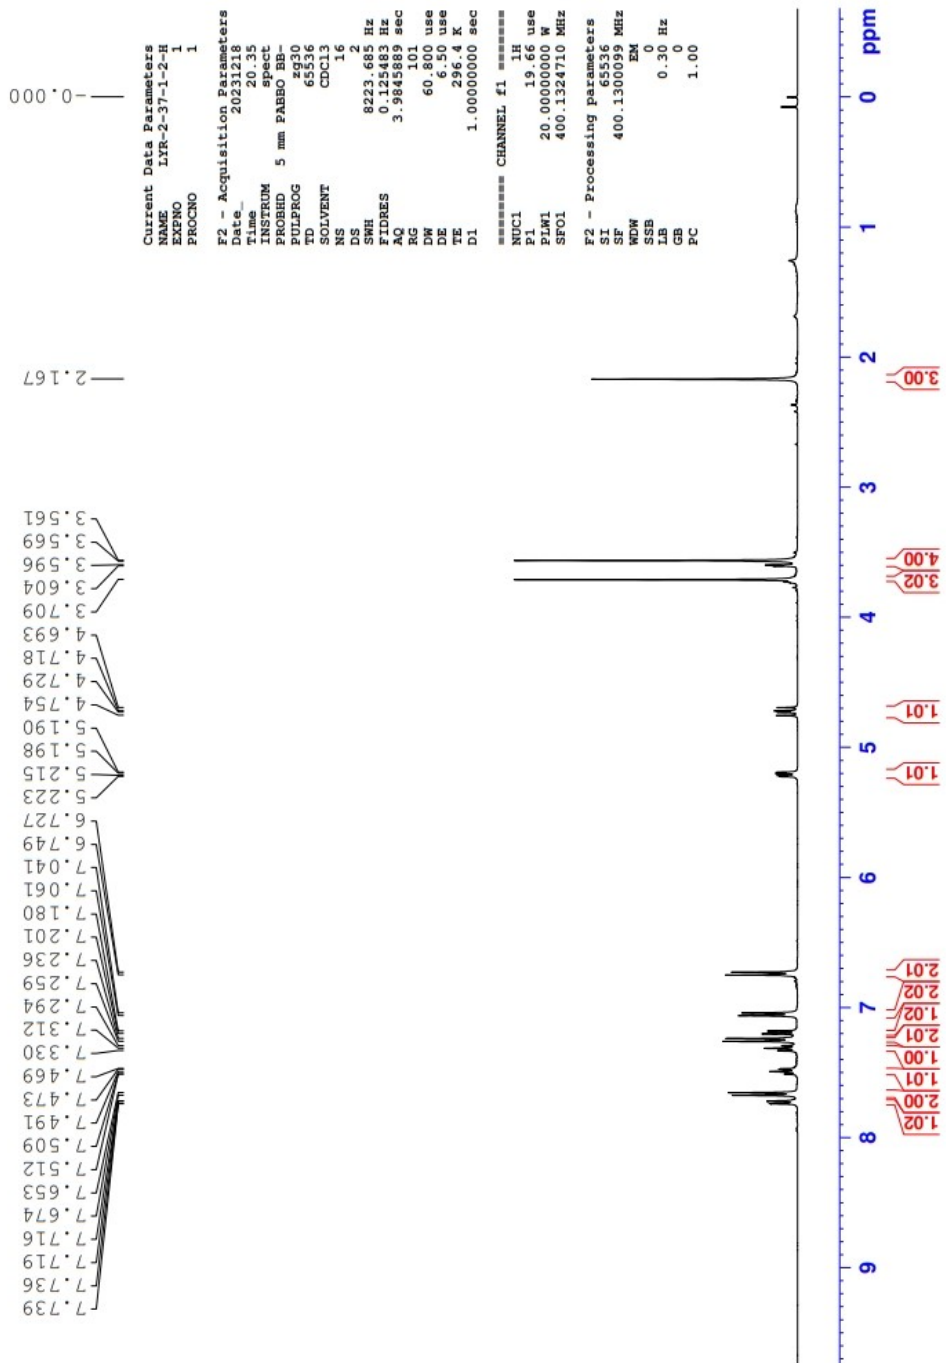

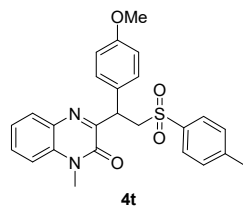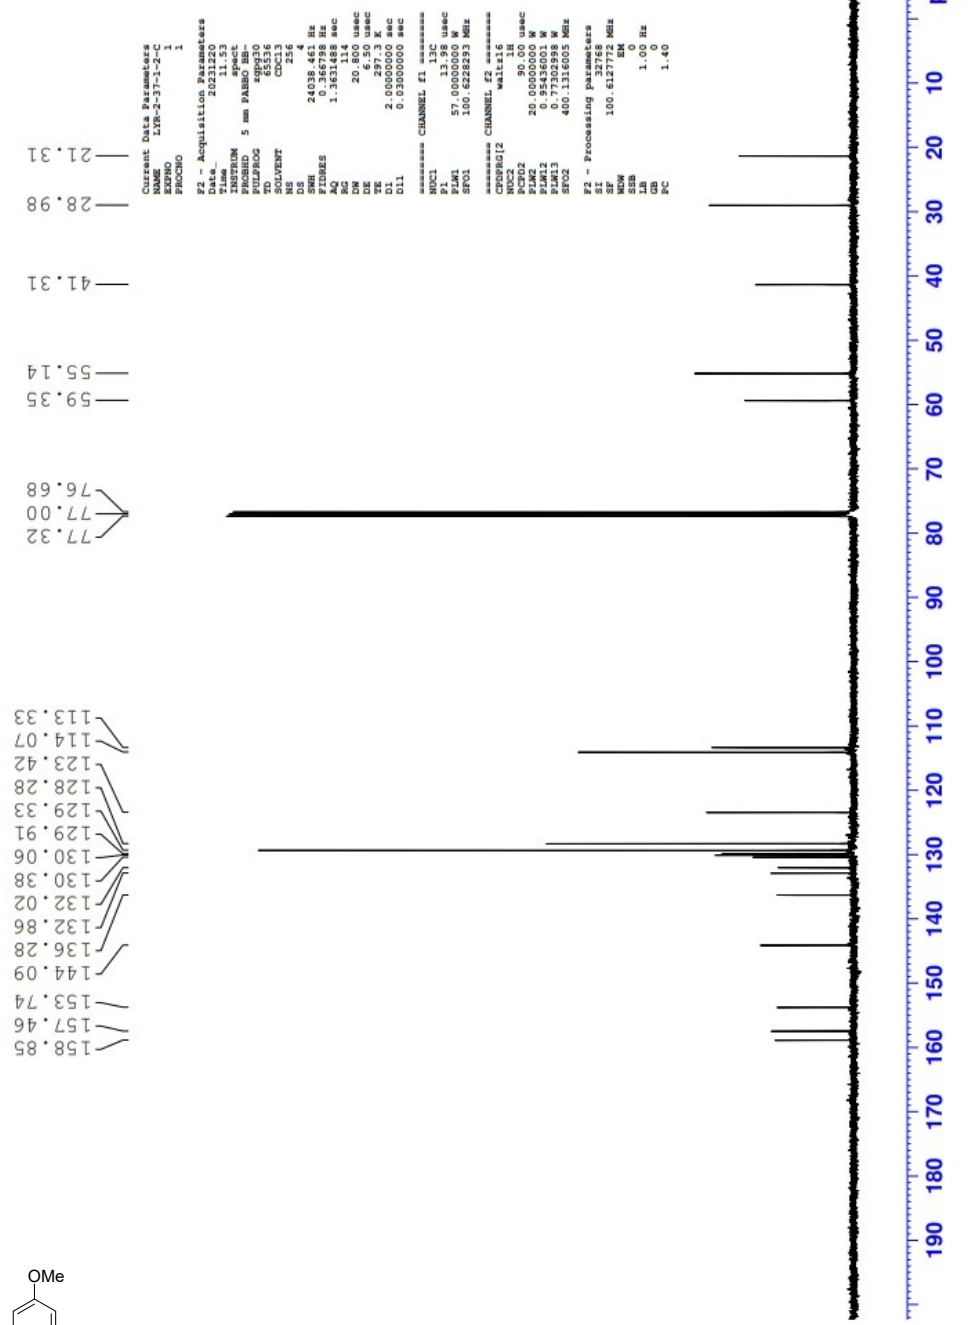

Current Data Parameters  
 NAME LVR-237-2-C  
 EXPNO 1  
 PROCNO 1

F2 - Acquisition Parameters  
 Date\_ 202120  
 Time\_ 11:11:14  
 INSTRUM spect  
 PROBRD 5 mm PABBO BB-  
 PULPROG zgpg30  
 TD 65536  
 SOLVENT CDCl3  
 C13 13  
 DS 4  
 SWH 24038.461 Hz  
 FIDRES 0.366798 Hz  
 AQ 1.302114 sec  
 RG 327.5  
 DM 20.800 usec  
 DE 297.3 K  
 TE 300.2 K  
 D1 2.00000000 sec  
 D11 0.03000000 sec

===== CHANNEL f1 =====  
 NUCL 13C  
 P1 13.00 usec  
 PL1 57.0000000 M  
 SFO1 100.628292 MHz

===== CHANNEL f2 =====  
 CPDPRG2 wait16  
 NUCL 13C  
 P1 13.00 usec  
 PL1 57.0000000 M  
 SFO1 100.628292 MHz

===== CHANNEL f3 =====  
 CPDPRG2 wait16  
 NUCL 13C  
 P1 13.00 usec  
 PL1 57.0000000 M  
 SFO1 100.628292 MHz

F2 - Processing parameters  
 SI 32768  
 SF 100.612772 MHz  
 DS 4  
 LB 0  
 SS 0  
 SSB 1.00 Hz  
 GB 0  
 PC 1.40

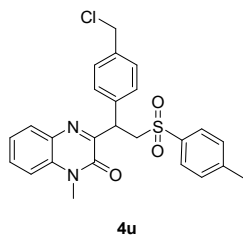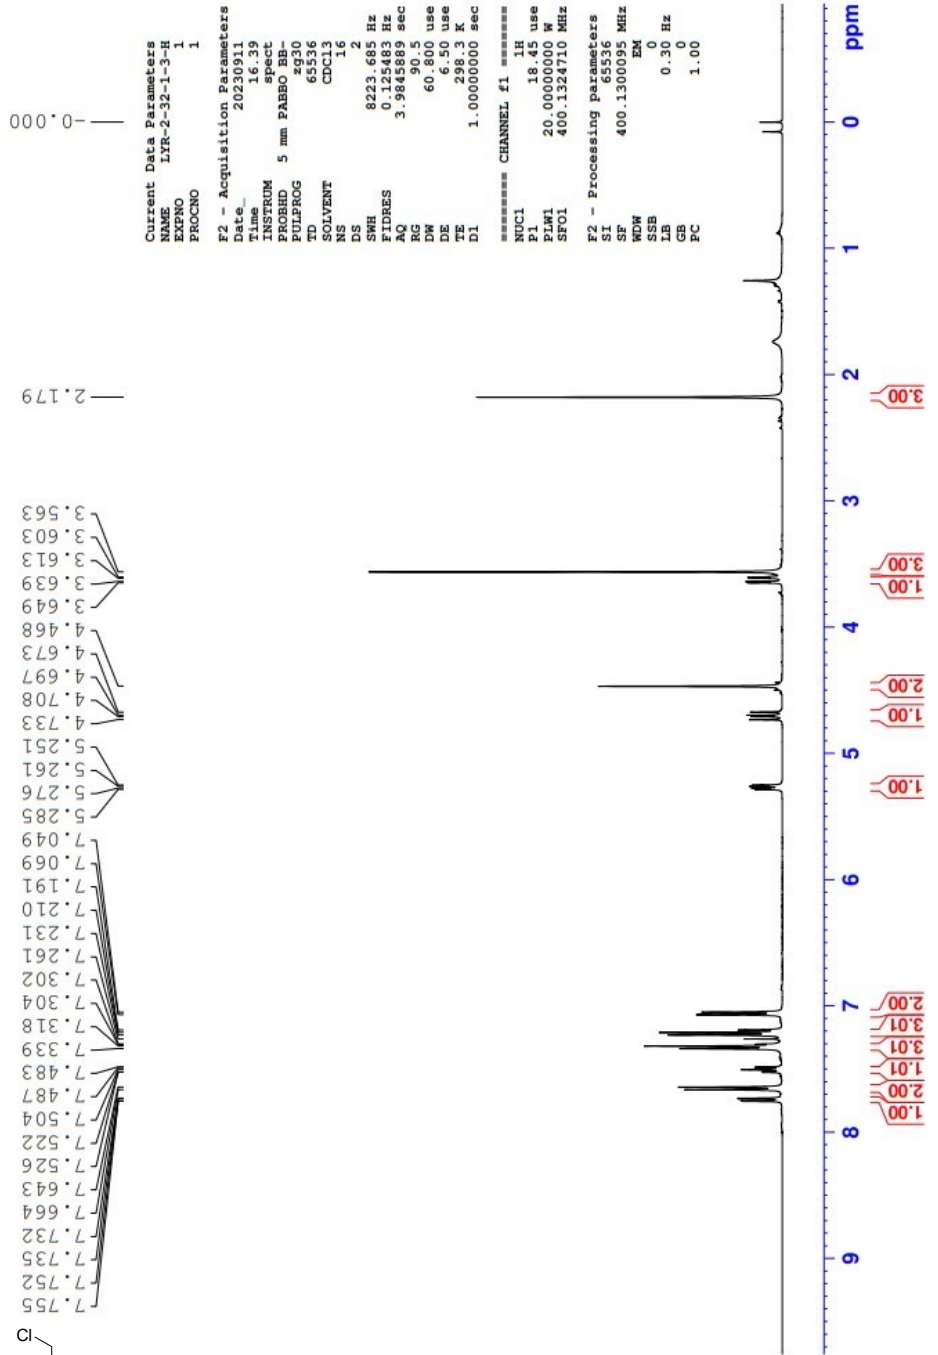

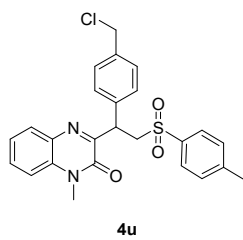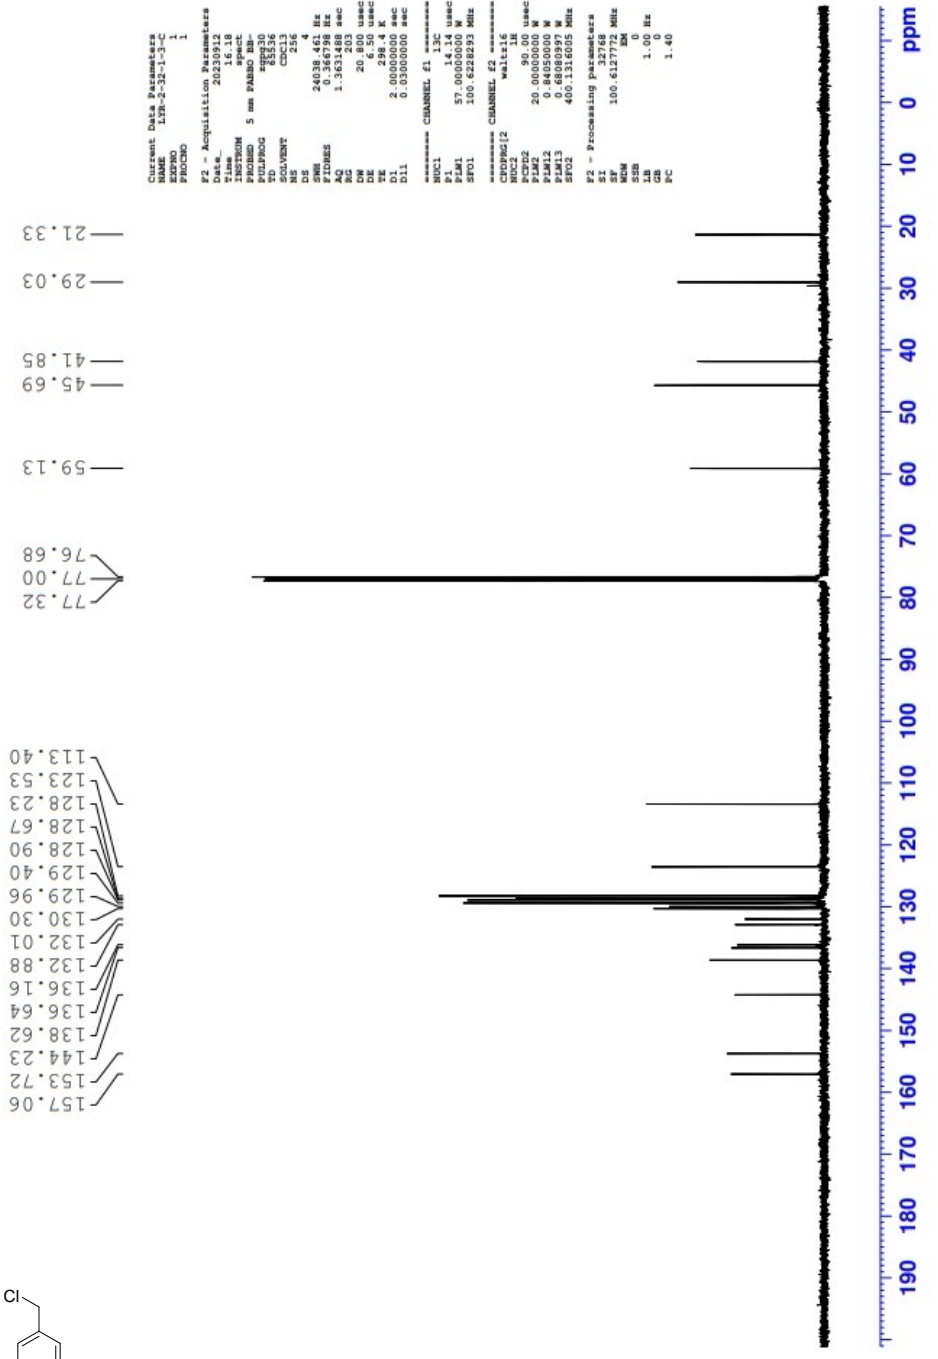

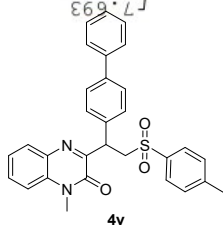

Current Data Parameters  
 NAME LXR-2-132-1-2-H  
 EXPNO 1  
 PROCNO 1

F2 - Acquisition Parameters  
 Date\_ 202112  
 Time 01:00  
 INSTRUM spect  
 PULPROG zg30  
 TD 65536  
 SOLVENT CDCl3  
 DS 16  
 NS 2  
 SWH 8223.685 Hz  
 FIDRES 0.125483 Hz  
 AQ 3.984589 sec  
 RG 144  
 DW 60.800 use  
 DE 655 use  
 TE 295.9 K  
 D1 1.0000000 sec

===== CHANNEL f1 =====  
 NUC1 1H  
 P1 19.66 use  
 PLW1 20.0000000 W  
 SFO1 400.1324710 MHz

F2 - Processing parameters  
 SI 65536  
 SF 400.1300117 MHz  
 WDW EM  
 SSB 0  
 GB 0  
 PC 1.00

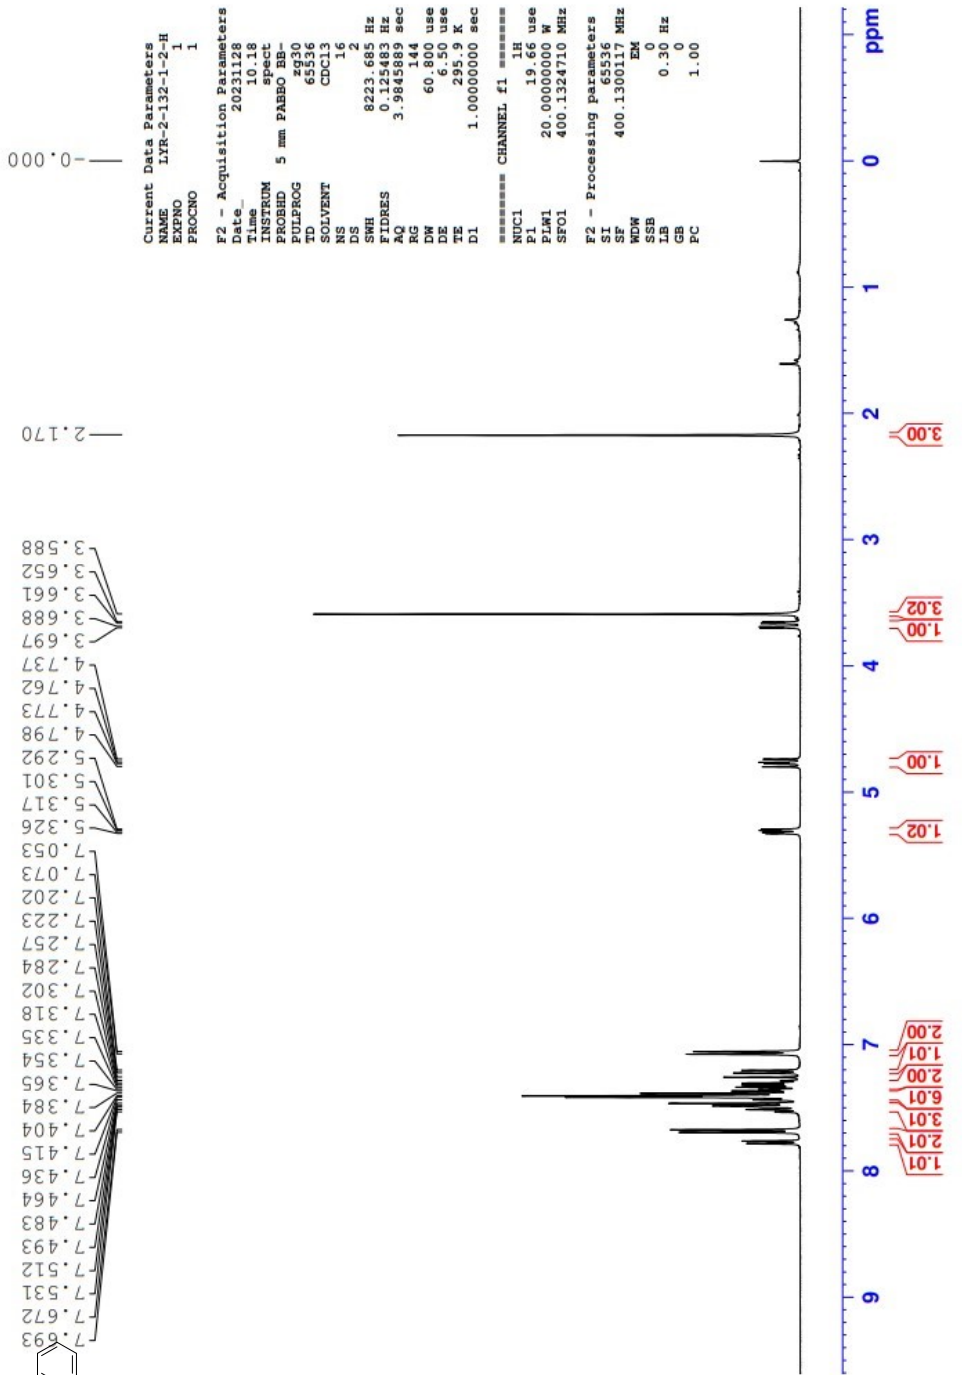



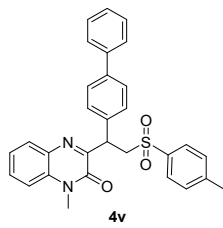

157.30  
153.85  
144.17  
140.53  
140.41  
137.39  
136.33  
132.97  
132.12  
130.22  
130.04  
129.40  
128.71  
128.69  
128.34  
127.44  
127.29  
126.97  
123.52  
113.41

77.32  
77.00  
76.68

59.29  
41.88  
29.07  
21.36

Current Data Parameters  
NAME LVR-213P-1-2-C  
PROCNO 1  
F2 - Acquisition Parameters  
Date\_ 20231128  
Time 17.59  
PROCNO 1  
PROCNAME LVR-213P-1-2-C  
PULPROG zgpg30  
SFO1 100.6228293 MHz  
SFO2 100.6228293 MHz  
SFO3 100.6228293 MHz  
SFO4 400.1160500 MHz  
SOLVENT CDCl3  
NS 256  
DS 4  
SS 24038.454 Hz  
AQ 0.366798 sec  
FIDRES 1.3631488 Hz  
AQ 0.366798 sec  
EM 20.800 usec  
DE 6.50 usec  
TE 300.2 K  
D1 2.0000000 sec  
D11 0.0300000 sec  
===== CHANNEL f1 =====  
NUC1 13C  
P1 13.98 usec  
PL1 0.0000000 dB  
SFO1 100.6228293 MHz  
===== CHANNEL f2 =====  
CPDPRG2 waltz16  
NUC2 1H  
P2 1.00 usec  
PL2 0.0000000 dB  
PL12 20.0000000 MHz  
PL13 0.95436001 MHz  
PL14 0.77302998 MHz  
SFO4 400.1160500 MHz  
F2 - Processing parameters  
SI 32768  
SF 100.6127735 MHz  
WDW EM  
SSB 0  
GB 1.00 Hz  
CB 0  
PC 1.40

190 180 170 160 150 140 130 120 110 100 90 80 70 60 50 40 30 20 10 0 ppm

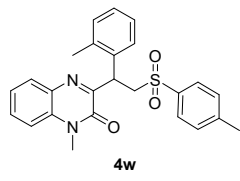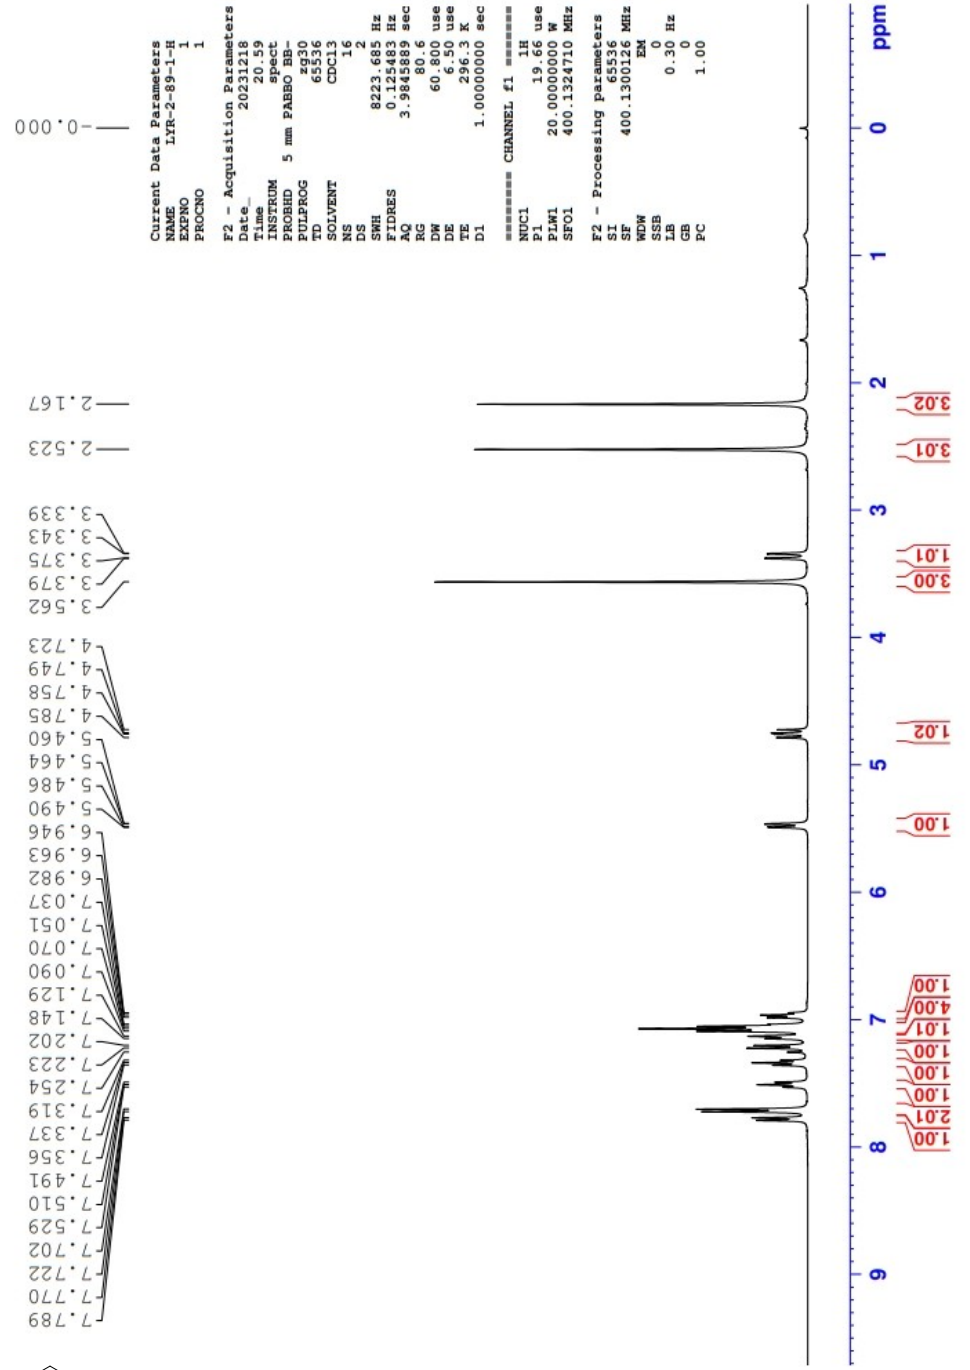

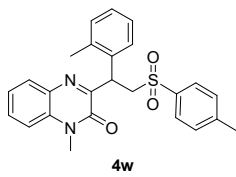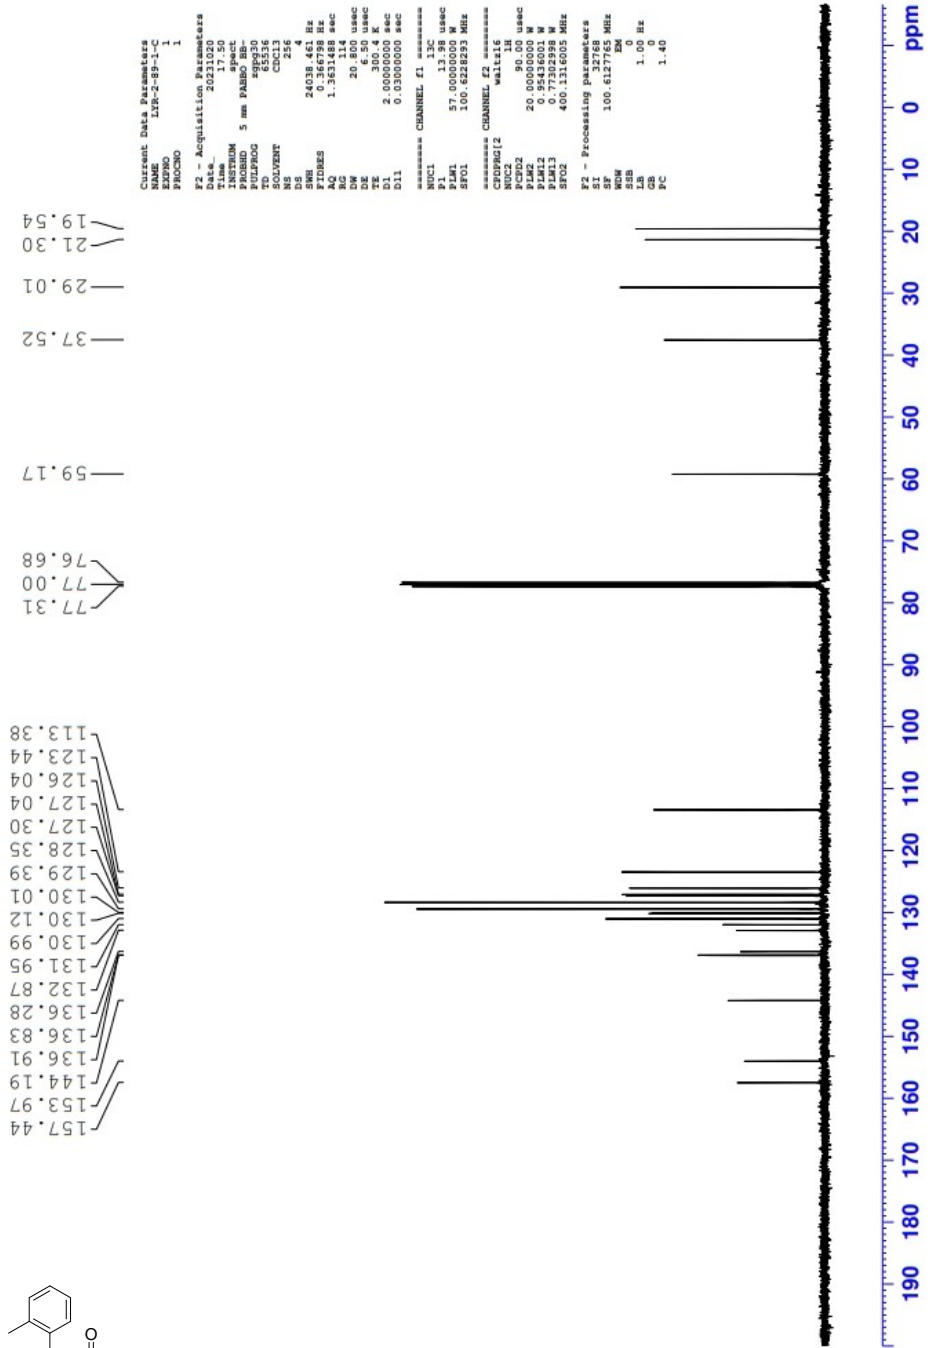

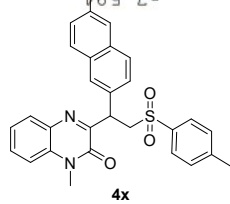

7.579  
 7.572  
 7.558  
 7.485  
 7.467  
 7.449  
 7.446  
 7.432  
 7.428  
 7.411  
 7.407  
 7.327  
 7.325  
 7.307  
 7.289  
 7.287  
 7.250  
 7.161  
 7.140  
 7.071  
 7.065  
 7.049  
 7.043  
 7.000  
 6.979  
 5.405  
 5.396  
 5.380  
 5.371  
 4.821  
 4.797  
 4.785  
 4.761  
 3.844  
 3.734  
 3.725  
 3.698  
 3.689  
 3.518  
 2.107  
 -0.000

**Current Data Parameters**  
 NAME LXR-2-90-2-H  
 EXPNO 1  
 PROCNO 1  
  
**F2 - Acquisition Parameters**  
 Date\_ 2023115  
 Time 14.33  
 INSTRUM QNP1H1  
 PROBHD PRO130  
 PULPROG zgpg30  
 TD 65536  
 SOLVENT CDCl3  
 NS 16  
 DS 2  
 SWH 8108.000 Hz  
 FIDRES 0.125004 Hz  
 AQ 3.9998767 sec  
 RG 50.88  
 DW 61.667 use  
 DE 30.00 use  
 TE 294.6 K  
 NUC1 1H  
 SFO1 400.1113911 MHz  
 D1 1.00000000 sec  
 P1 11.60 use  
 PL1 58.00 dB  
 PL1W 0.00001592 W  
  
**F2 - Processing parameters**  
 SI 65536  
 SF 400.1050820 MHz  
 WDW EM  
 SSB 0  
 LB 0.30 Hz  
 GB 0  
 PC 4.00

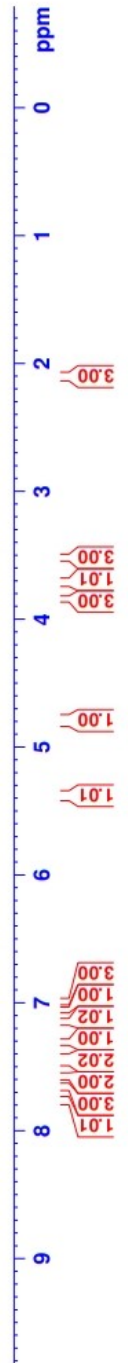

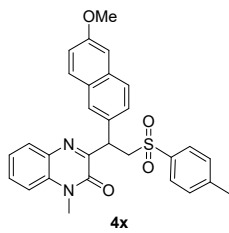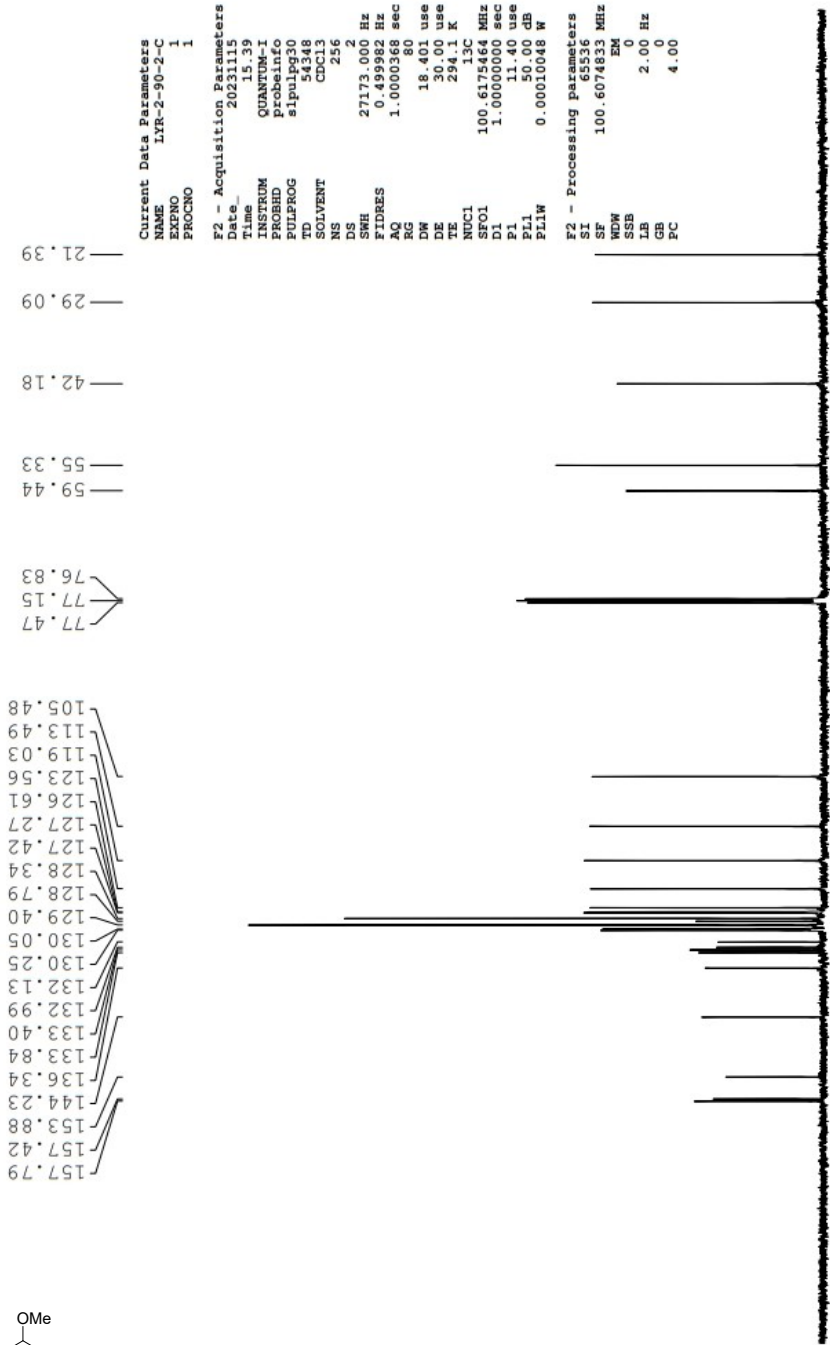

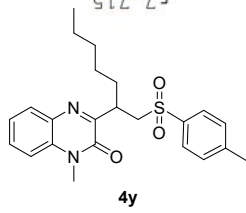

7.715  
7.695  
7.663  
7.643  
7.531  
7.513  
7.511  
7.495  
7.492  
7.337  
7.318  
7.298  
7.269  
7.238  
7.217  
7.059  
7.039  
4.324  
4.298  
4.288  
4.262  
3.964  
3.958  
3.946  
3.940  
3.930  
3.921  
3.915  
3.903  
3.897  
3.613  
3.355  
3.349  
3.319  
2.183  
1.753  
1.740  
1.724  
1.602  
1.577  
1.560  
1.548  
1.526  
1.515  
1.320  
1.306  
1.292  
1.285  
1.255  
1.231  
1.189  
1.181  
0.821  
0.805  
0.787  
0.000

Current Data Parameters  
 NAME LVR-2-84-1-H  
 EXPNO 1  
 PROCNO 1

F2 - Acquisition Parameters  
 Date\_ 20231030  
 Time 16.37  
 INSTRUM QUANTUM-1  
 PROBHD Probelin50  
 PULPROG zgpg30  
 TD 64822  
 SOLVENT CDCl3  
 NS 16  
 DS 2  
 SWH 8108.000 Hz  
 FIDRES 0.125004 Hz  
 AQ 3.9998767 sec  
 RG 55.96  
 DW 61.667 use  
 DE 30.00 use  
 TE 296.1 K  
 RUC1 1H  
 FOL 400.1113911 MHz  
 SF 1.0000000 sec  
 PI 11.60 dB  
 PL1 58.00 dB  
 PL1W 0.00001592 W

F2 - Processing parameters  
 SI 65536  
 SF 400.1050757 MHz  
 WDW EM  
 SSB 0  
 LB 0.30 Hz  
 GB 0  
 FC 4.00

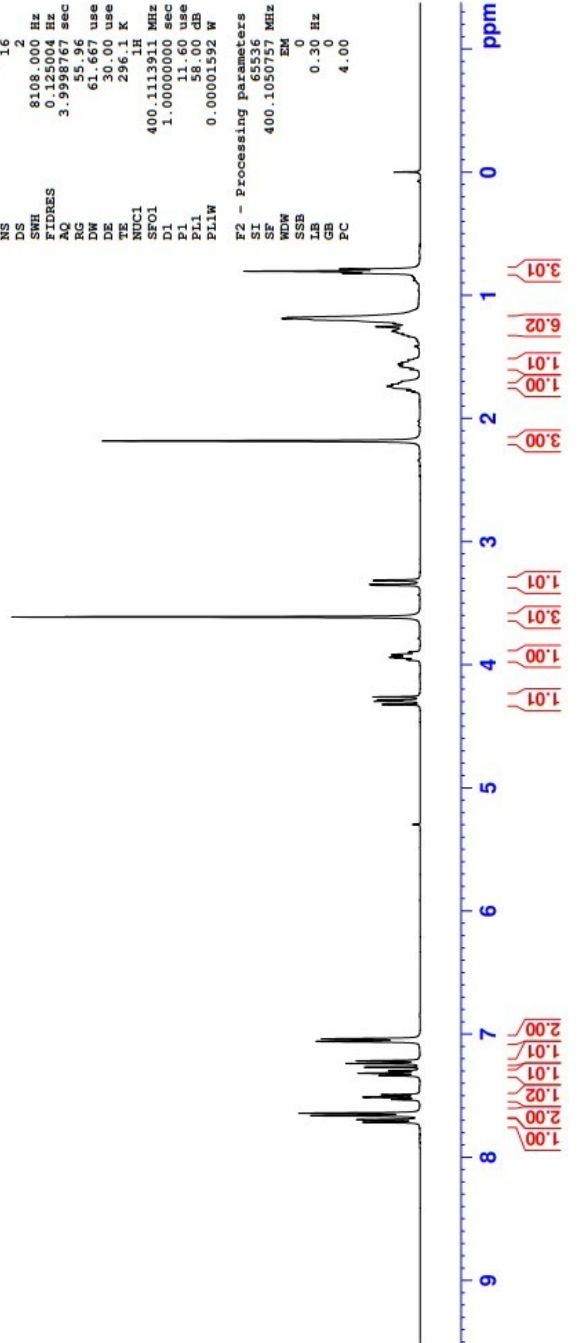

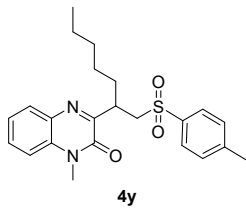

13.898  
21.338  
22.313  
26.318  
28.942  
31.363  
33.782  
37.266  
57.955  
76.679  
76.996  
77.314  
113.297  
123.441  
128.356  
129.248  
129.778  
129.970  
132.200  
132.840  
136.159  
144.019  
154.070  
159.614

Current Data Parameters  
 NAME LVR-284-1-C  
 EXPNO 1  
 PROCNO 1  
 F2 - Acquisition Parameters  
 Date\_ 20250909  
 Time 17.53  
 INSTRUM spect  
 QNPNAME 1  
 PULPROG zgpg30  
 TD 65536  
 SFO1 100.6175484 MHz  
 F2 100.6175484 MHz  
 F1 100.6175484 MHz  
 PL1 10.00 dB  
 PL12 10.00 dB  
 PL13 10.00 dB  
 PL14 10.00 dB  
 PL15 10.00 dB  
 PL16 10.00 dB  
 PL17 10.00 dB  
 PL18 10.00 dB  
 PL19 10.00 dB  
 PL20 10.00 dB  
 F2 - Processing parameters  
 SI 65536  
 SF 100.5943334 MHz  
 DS 4  
 SFO1 100.6175484 MHz  
 SFR 0  
 SSB 0  
 LB 2.00 Hz  
 GB 0  
 PC 4.00

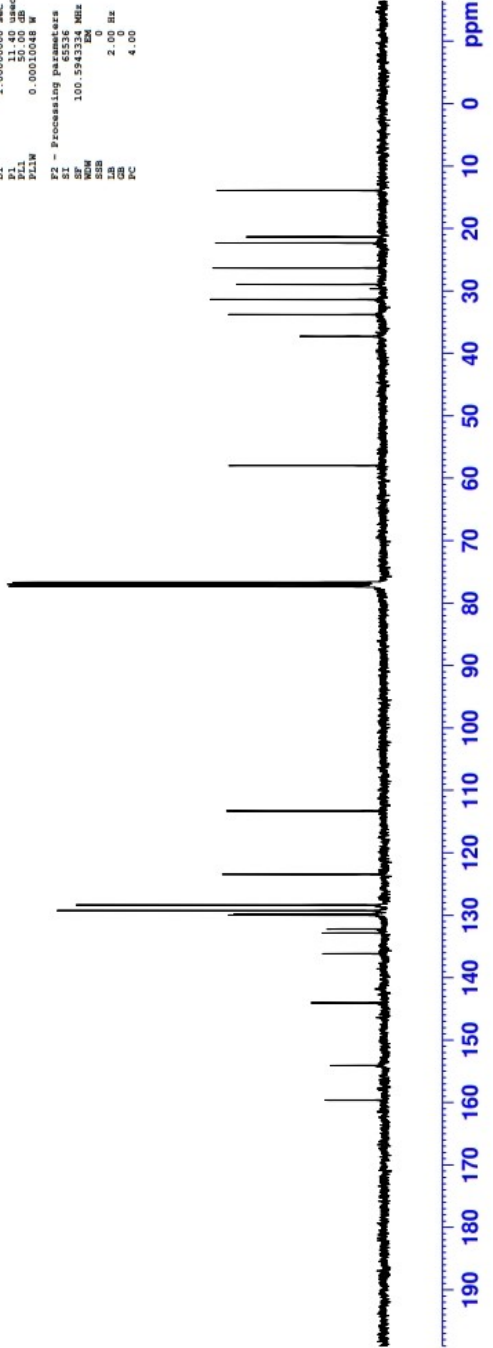

7.735  
7.733  
7.715  
7.713  
7.663  
7.643  
7.536  
7.533  
7.515  
7.497  
7.494  
7.340  
7.322  
7.303  
7.257  
7.218  
7.197  
7.170  
7.133  
7.094  
7.076  
7.053  
7.030  
4.317  
4.291  
4.281  
4.256  
4.034  
4.027  
4.018  
4.010  
4.003  
3.583  
3.408  
3.401  
3.373  
3.365  
2.646  
2.633  
2.621  
2.607  
2.530  
2.515  
2.505  
2.490  
2.210  
2.188  
2.170  
2.161  
2.154  
2.127  
1.984  
1.973  
1.969  
1.951  
1.951  
0.000

```

Current Data Parameters
NAME   F00-1-33-2-3-2-H
EXPNO  1
PROCNO  1

F2 - Acquisition Parameters
Date_   20240312
Time    17.24
INSTRUM spect
PROBHD  5 mm PABBO BB-
PULPROG zg30
TD       65536
SOLVENT CDCl3
NS       16
DS       2
SWH     8223.685 Hz
FIDRES  0.125483 Hz
AQ       3.984589 sec
RG       128
RW       60.128 usec
DE       6.950 usec
TE       301.5 K
D1       1.00000000 sec

===== CHANNEL F1 =====
NUC1     1H
P1       20.00 usec
PL1      0.00 dB
SFO1     400.1324710 MHz

F2 - Processing parameters
SI       65536
SF       400.1300109 MHz
WDW      EM
SS       0
SB       0.30 Hz
GB       0
PC       1.00
  
```

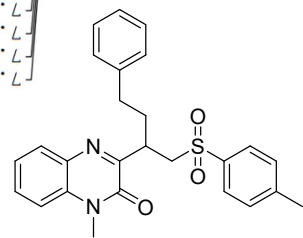

4z

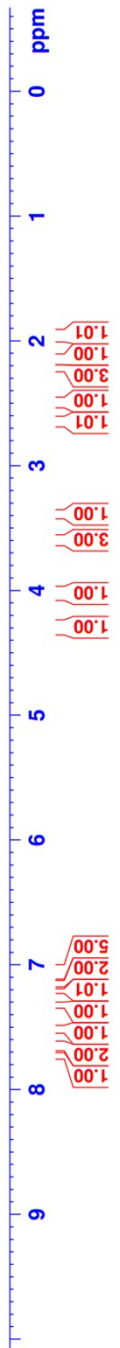



113.34  
123.51  
125.85  
128.23  
128.32  
128.42  
129.36  
129.91  
129.91  
130.14  
132.31  
132.98  
136.25  
140.99  
144.13  
154.13  
159.23

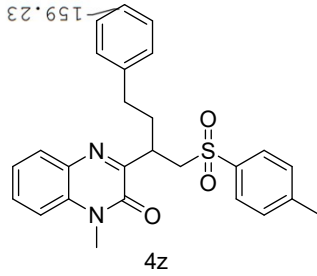

77.36  
77.04  
76.72

58.29

37.64  
35.31  
33.09  
28.99  
21.44  
0.00

Current Data Parameters  
NAME F00-1-33-2-3-2-C  
EXPNO 1  
PROCNO 1

F2 - Acquisition Parameters  
Date\_ 20240312  
Time 17.41  
INSTRUM spect  
PROBHD 5 mm PABBO BBO  
PULPROG zgpg30  
TD 65536  
SOLVENT CDCl3  
NS 256  
DS 4  
SWH 24038.461 Hz  
FIDRES 0.366788 Hz  
AQ 1.569181 sec  
RG 181  
DM 20.800 usec  
DE 6.50 usec  
TE 302.1 K  
D1 2.0000000 sec  
D11 0.0300000 sec

===== CHANNEL f1 =====  
NUC1 13C  
P1 14.67 usec  
PLW1 57.0000000 W  
SFO1 100.6228293 MHz

===== CHANNEL f2 =====  
CPDPRG12 waltz16  
NUC2 1H  
PCPD2 90.00 usec  
PLW2 20.0000000 W  
PLW12 1.06519997 W  
PLW13 0.86278999 W  
SFO2 400.1316005 MHz

F2 - Processing parameters  
SI 32768  
SF 100.6127690 MHz  
WDW EM  
SSB 0  
LB 1.00 Hz  
GB 0  
PC 1.40

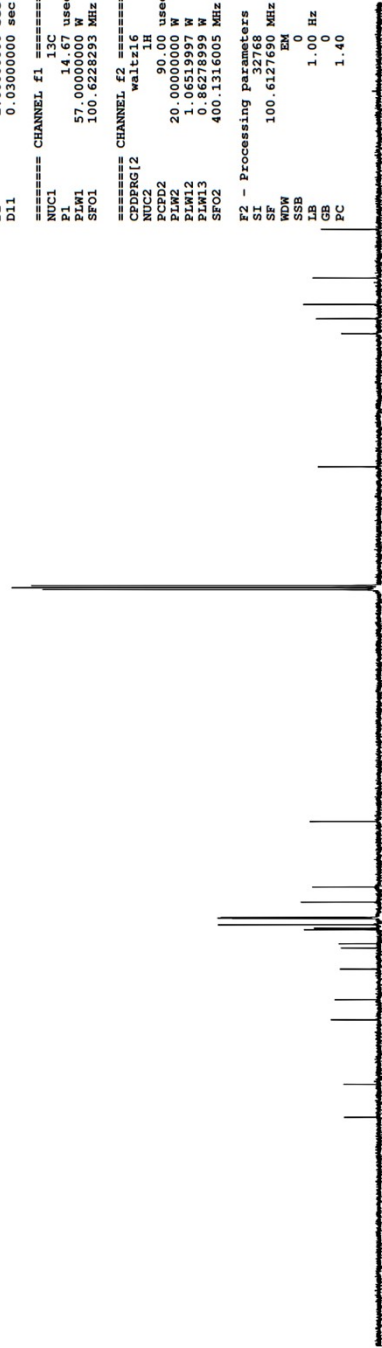

190 180 170 160 150 140 130 120 110 100 90 80 70 60 50 40 30 20 10 0 ppm

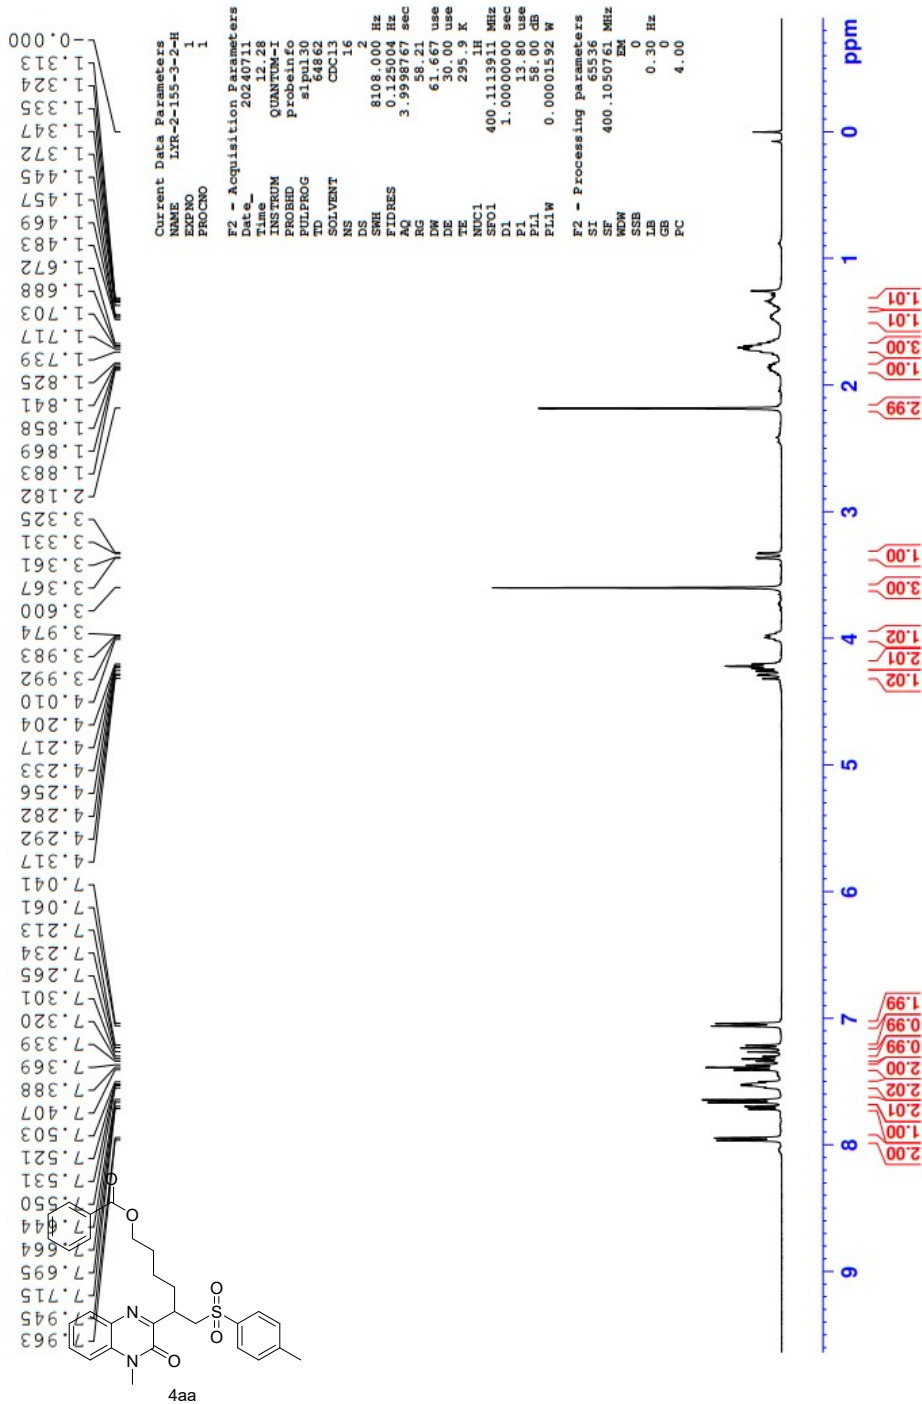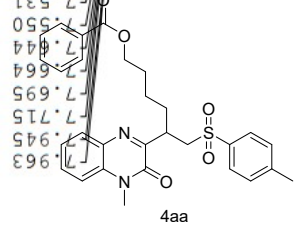

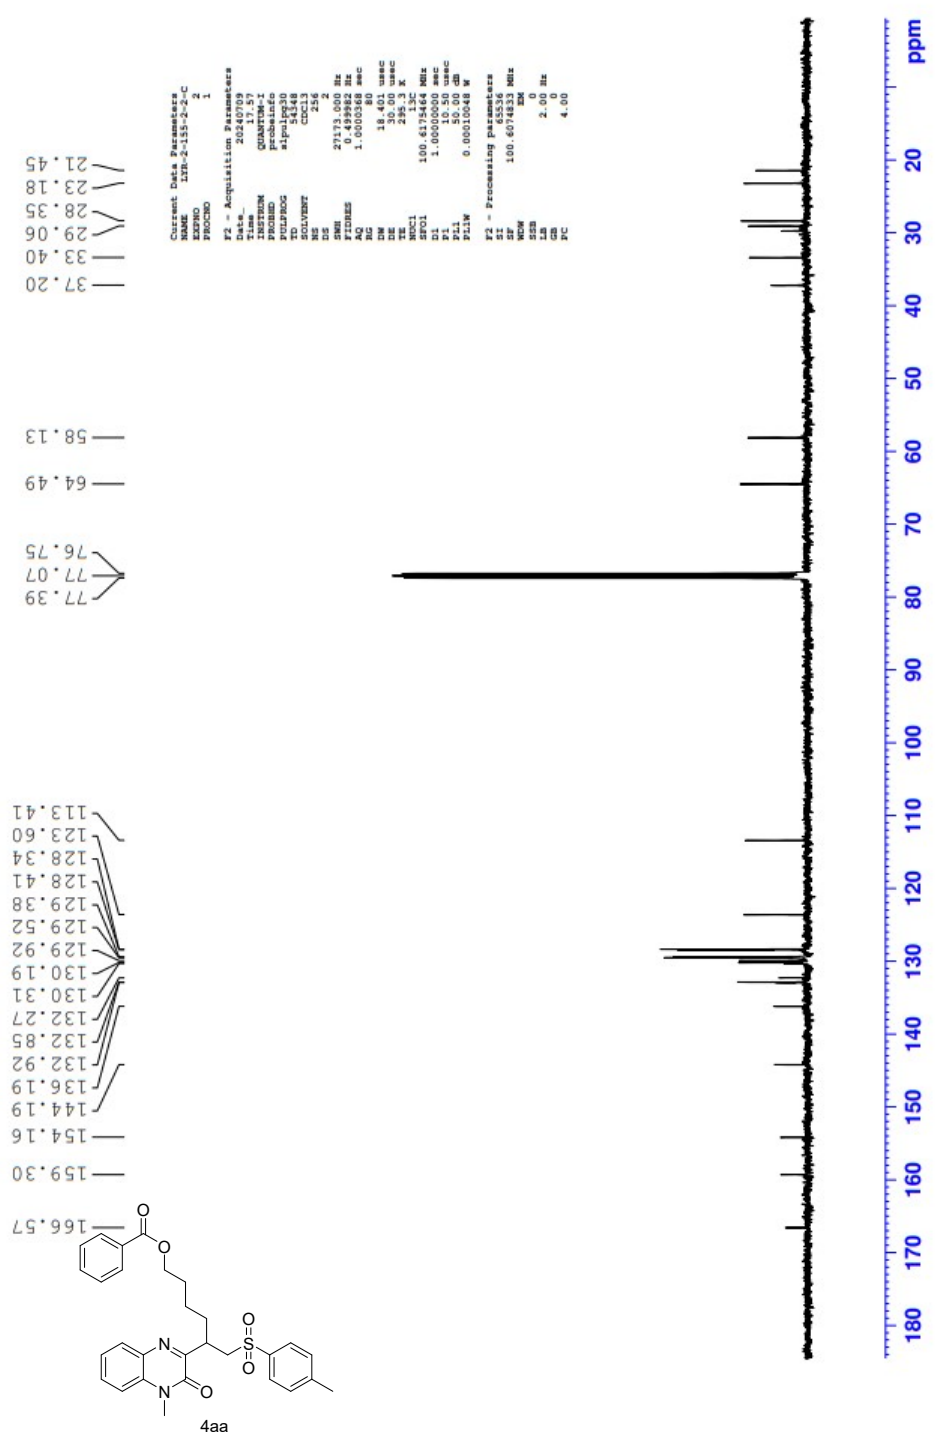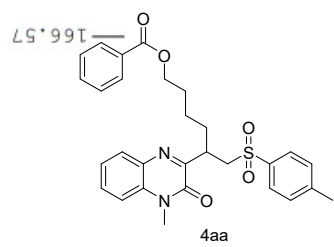

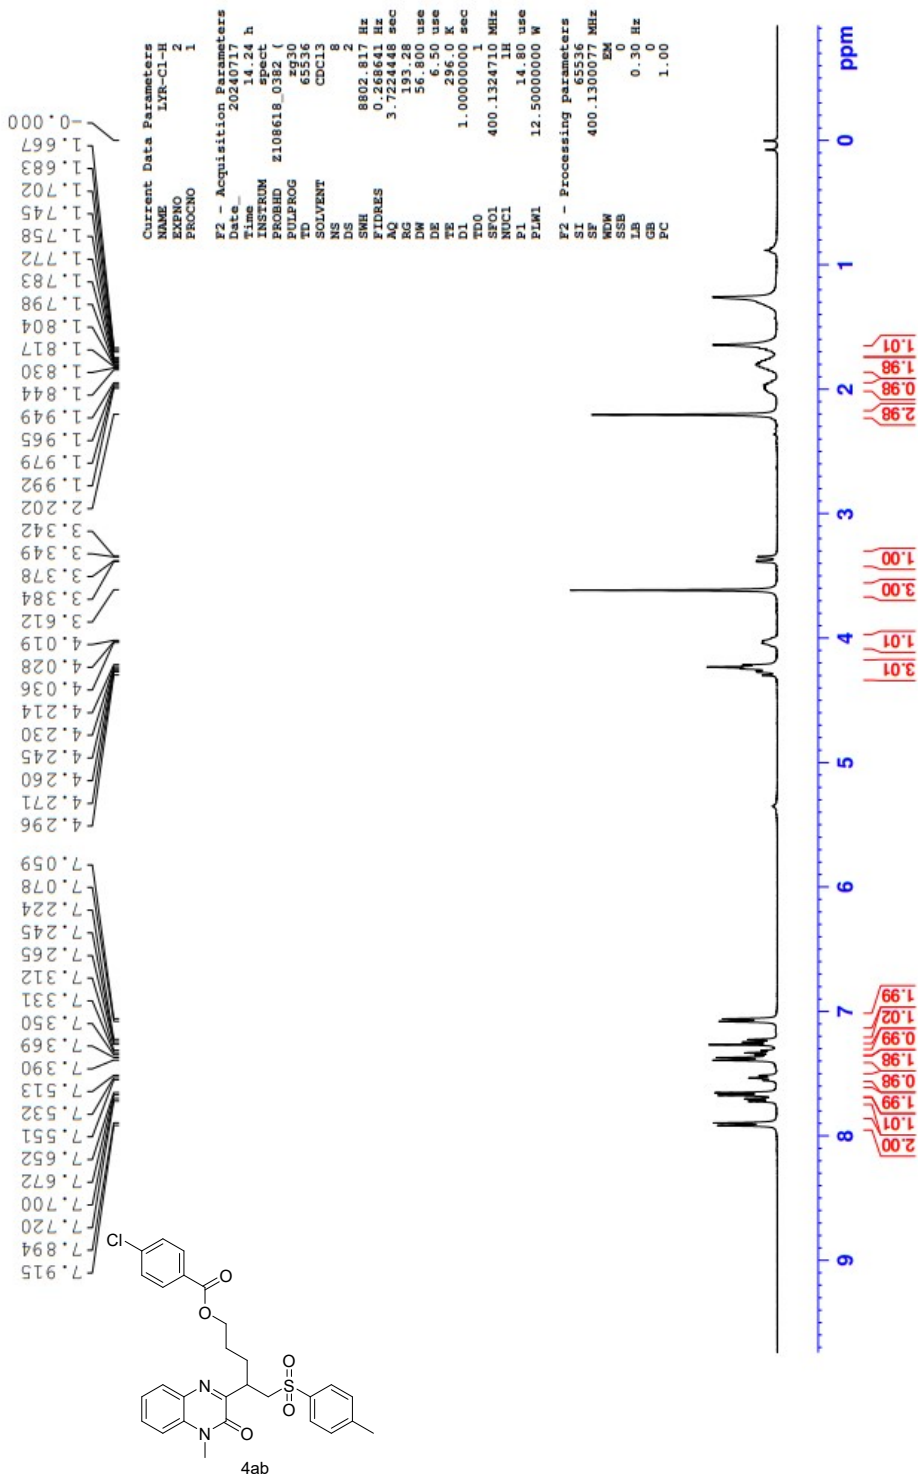

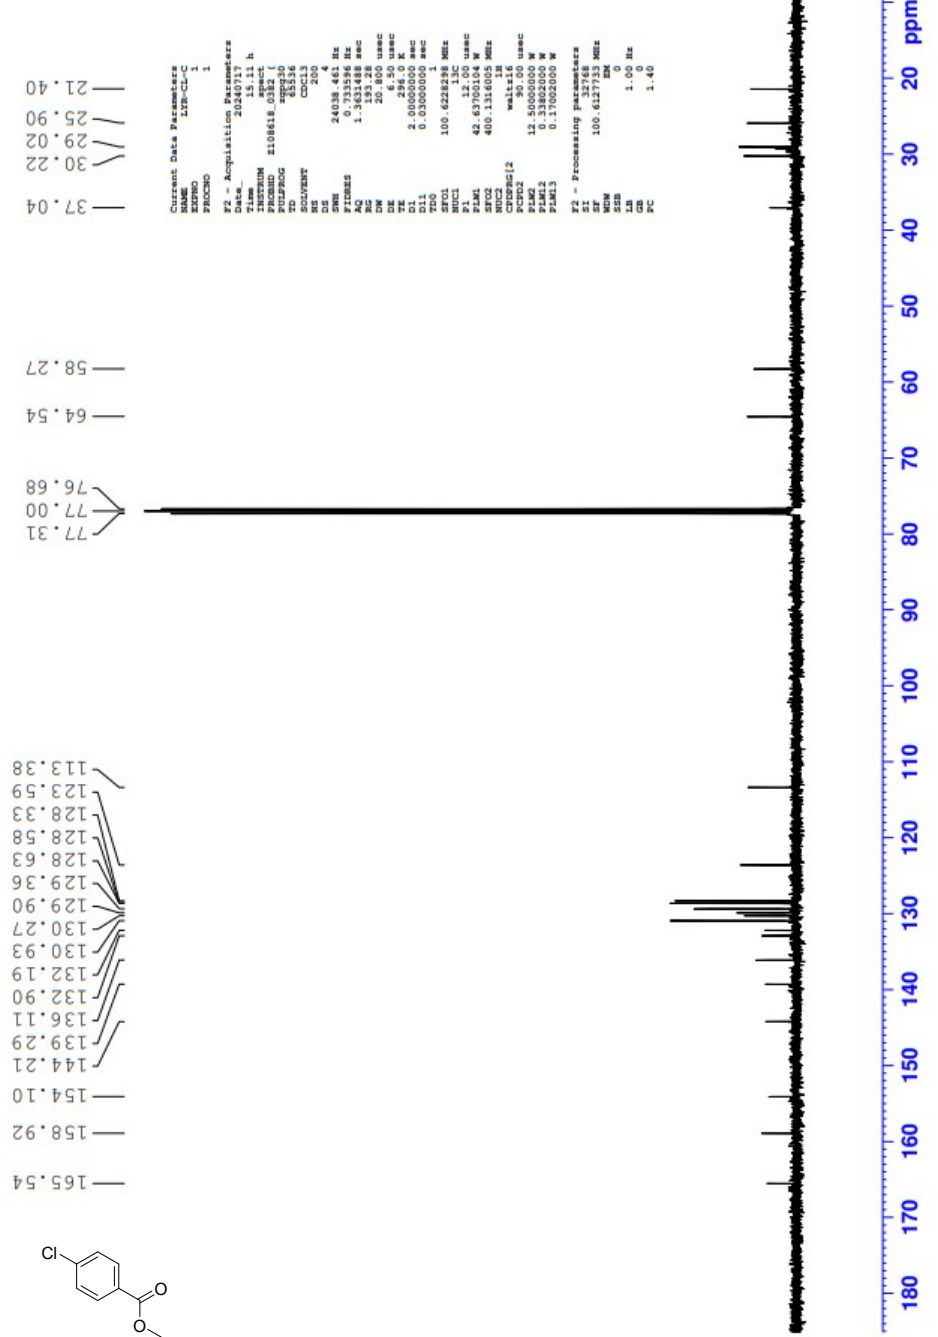

Current Data Parameters  
 NAME 12P-CL-C  
 PROCNO 1  
 F2 - Acquisition Parameters  
 INSTRUM spect  
 TIME 15.11 h  
 F1FREQ 200.130 MHz  
 F2FREQ 5106618.8 Spect  
 PULPROG zgpg30  
 TD 65536  
 SFO2 400.1316055 MHz  
 AQ 0.3300000 sec  
 CONVTIME 200  
 NS 200  
 DS 4  
 SWH 24038.4 Hz  
 FWHM 0.733556 Hz  
 FIDRES 1.3631488 sec  
 AQ 0.3300000 sec  
 SFO1 200.130 MHz  
 DE 6.50 usec  
 DI 2.0000000 K  
 D11 0.0300000 sec  
 D12 0.0300000 sec  
 D13 0.0300000 sec  
 D14 0.0300000 sec  
 D15 0.0300000 sec  
 D16 0.0300000 sec  
 D17 0.0300000 sec  
 D18 0.0300000 sec  
 D19 0.0300000 sec  
 D20 0.0300000 sec  
 D21 0.0300000 sec  
 D22 0.0300000 sec  
 D23 0.0300000 sec  
 D24 0.0300000 sec  
 D25 0.0300000 sec  
 D26 0.0300000 sec  
 D27 0.0300000 sec  
 D28 0.0300000 sec  
 D29 0.0300000 sec  
 D30 0.0300000 sec  
 D31 0.0300000 sec  
 D32 0.0300000 sec  
 D33 0.0300000 sec  
 D34 0.0300000 sec  
 D35 0.0300000 sec  
 D36 0.0300000 sec  
 D37 0.0300000 sec  
 D38 0.0300000 sec  
 D39 0.0300000 sec  
 D40 0.0300000 sec  
 D41 0.0300000 sec  
 D42 0.0300000 sec  
 D43 0.0300000 sec  
 D44 0.0300000 sec  
 D45 0.0300000 sec  
 D46 0.0300000 sec  
 D47 0.0300000 sec  
 D48 0.0300000 sec  
 D49 0.0300000 sec  
 D50 0.0300000 sec  
 D51 0.0300000 sec  
 D52 0.0300000 sec  
 D53 0.0300000 sec  
 D54 0.0300000 sec  
 D55 0.0300000 sec  
 D56 0.0300000 sec  
 D57 0.0300000 sec  
 D58 0.0300000 sec  
 D59 0.0300000 sec  
 D60 0.0300000 sec  
 D61 0.0300000 sec  
 D62 0.0300000 sec  
 D63 0.0300000 sec  
 D64 0.0300000 sec  
 D65 0.0300000 sec  
 D66 0.0300000 sec  
 D67 0.0300000 sec  
 D68 0.0300000 sec  
 D69 0.0300000 sec  
 D70 0.0300000 sec  
 D71 0.0300000 sec  
 D72 0.0300000 sec  
 D73 0.0300000 sec  
 D74 0.0300000 sec  
 D75 0.0300000 sec  
 D76 0.0300000 sec  
 D77 0.0300000 sec  
 D78 0.0300000 sec  
 D79 0.0300000 sec  
 D80 0.0300000 sec  
 D81 0.0300000 sec  
 D82 0.0300000 sec  
 D83 0.0300000 sec  
 D84 0.0300000 sec  
 D85 0.0300000 sec  
 D86 0.0300000 sec  
 D87 0.0300000 sec  
 D88 0.0300000 sec  
 D89 0.0300000 sec  
 D90 0.0300000 sec  
 D91 0.0300000 sec  
 D92 0.0300000 sec  
 D93 0.0300000 sec  
 D94 0.0300000 sec  
 D95 0.0300000 sec  
 D96 0.0300000 sec  
 D97 0.0300000 sec  
 D98 0.0300000 sec  
 D99 0.0300000 sec  
 D100 0.0300000 sec  
 F2 - Processing Parameters  
 SI 32768  
 SF 100.6127733 MHz  
 DS 4  
 SW 24038.4 Hz  
 SSB 0  
 LB 1.00 Hz  
 GB 0  
 SC 1.40

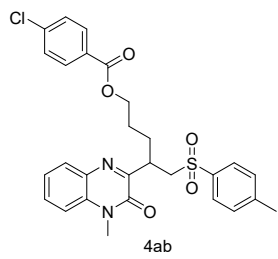

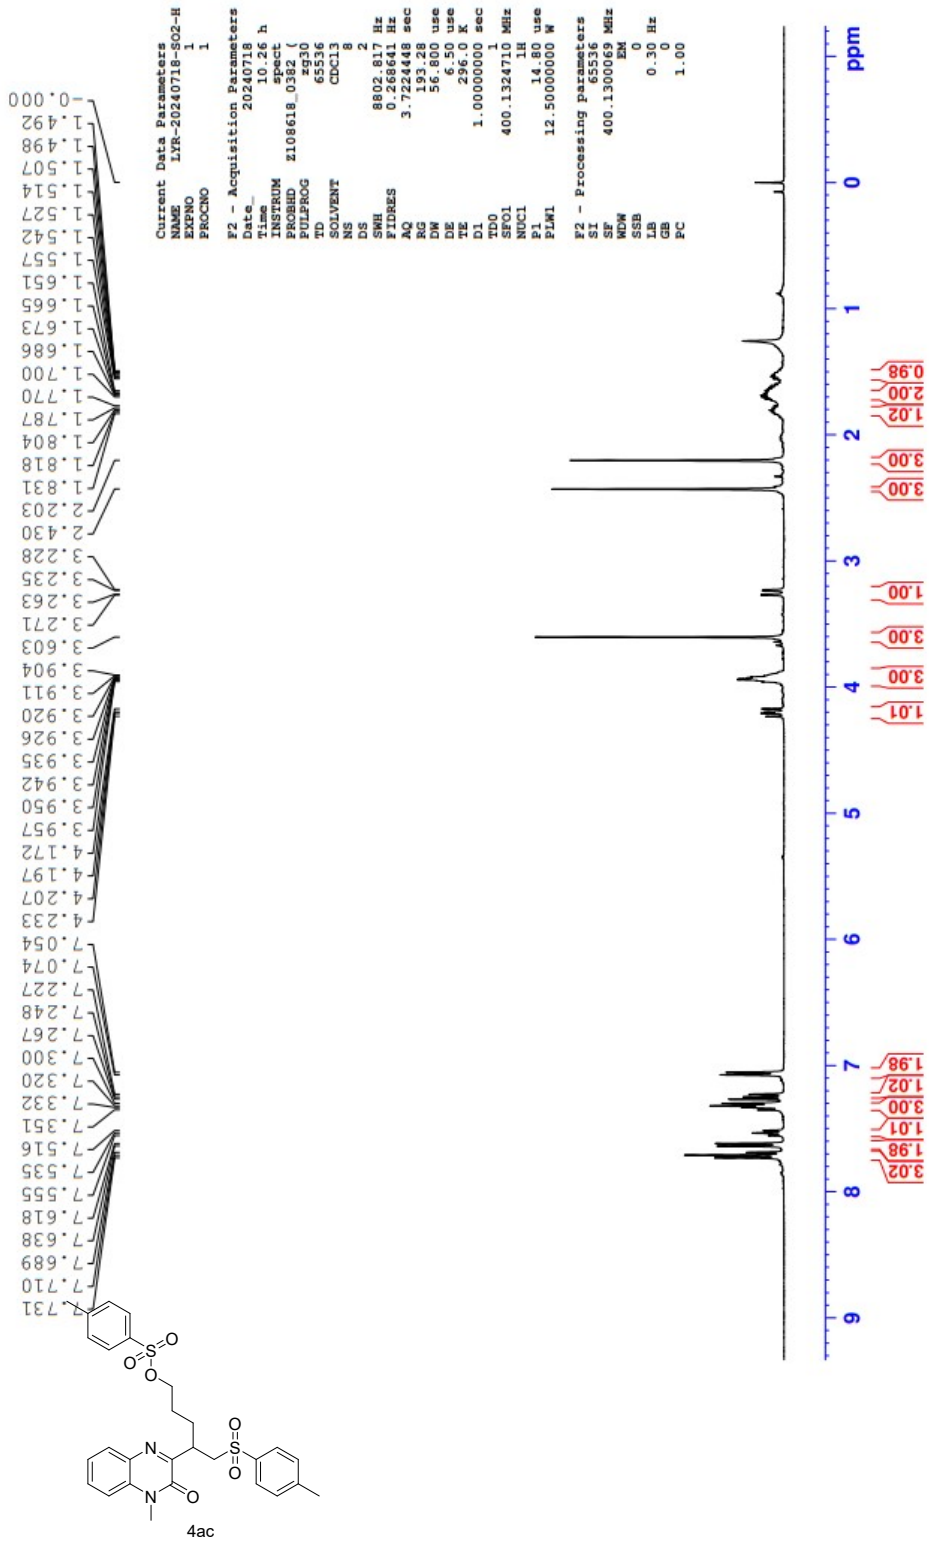

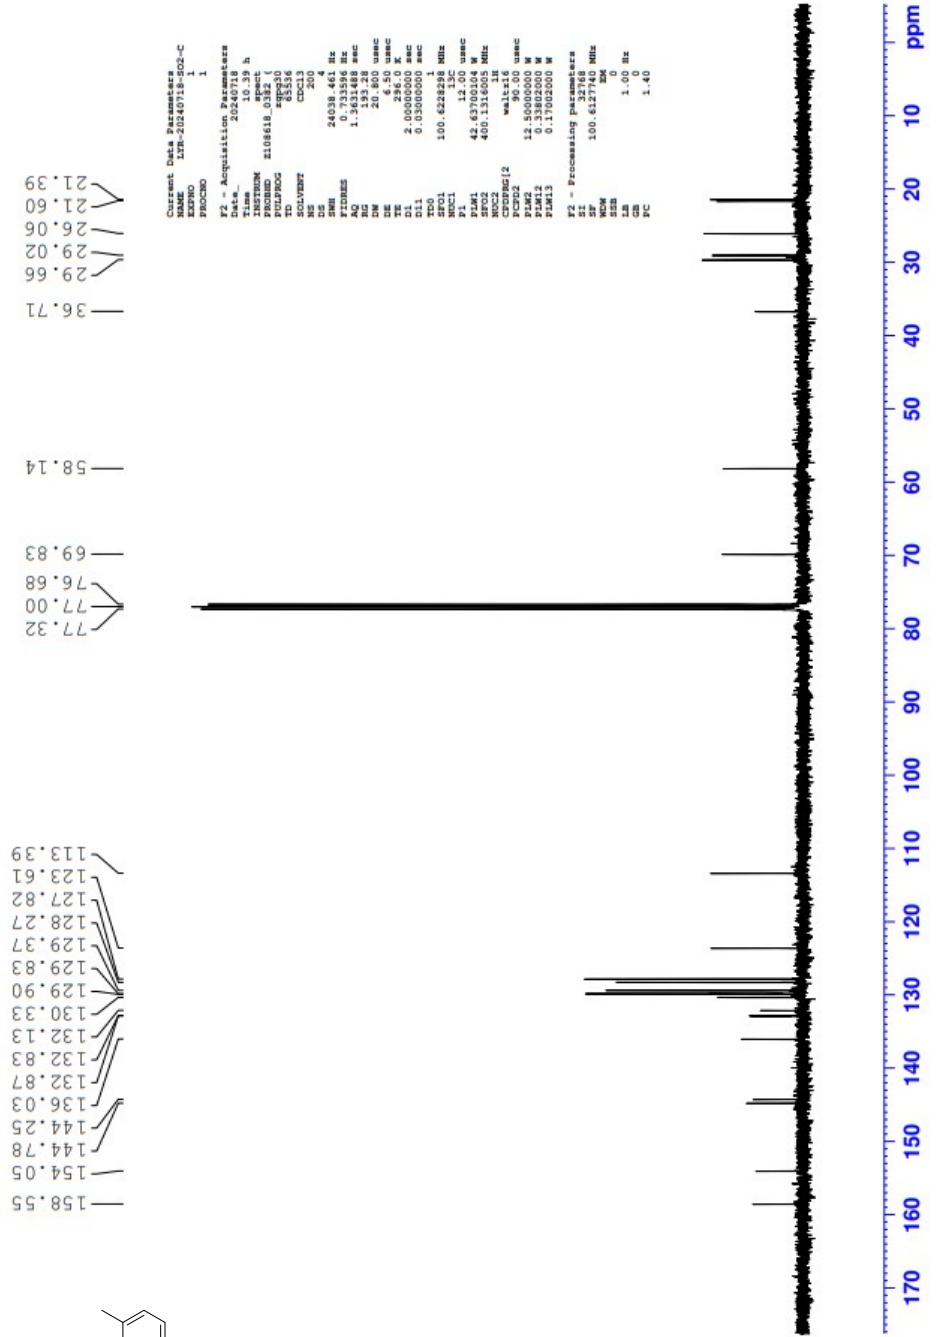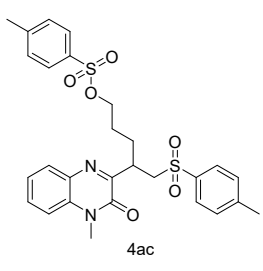



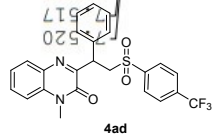

3.546  
3.708  
3.718  
3.745  
3.754  
4.745  
4.769  
4.781  
4.805  
5.268  
5.278  
5.293  
5.302  
7.155  
7.162  
7.168  
7.172  
7.180  
7.199  
7.211  
7.215  
7.220  
7.259  
7.299  
7.302  
7.307  
7.310  
7.320  
7.326  
7.330  
7.337  
7.340  
7.491  
7.495  
7.499  
7.512  
7.517  
7.520

Current Data Parameters  
 NAME LXR-2-37-2-1-H  
 EXPNO 1  
 PROCNO 1

F2 - Acquisition Parameters  
 Date\_ 20230827  
 Time 12:21  
 INSTRUM spect  
 PROBRD 5 mm PABBO BR-  
 PULPROG zg30  
 TD 65536  
 SOLVENT CDCl3  
 NS 16  
 DS 2  
 SWH 8223.685 Hz  
 FIDRES 0.125483 Hz  
 AQ 3.9845889 sec  
 RG 101  
 LW 60.800 use  
 LE 6.000 use  
 TE 297.3 K  
 D1 1.00000000 sec

===== CHANNEL f1 =====  
 NUC1 1H  
 P1 18.45 use  
 PLW1 20.00000000 W  
 SFO1 400.1324710 MHz

F2 - Processing parameters  
 SI 65536  
 SF 400.1300136 MHz  
 EQ 0  
 SSB 0  
 LB 0.30 Hz  
 GB 0  
 PC 1.00

0.000

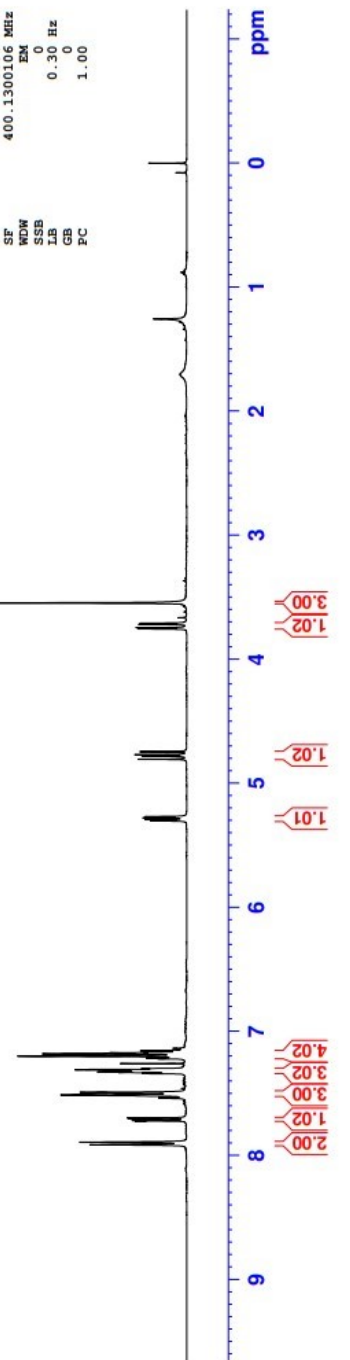



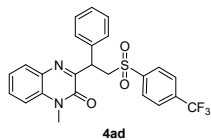

156.96  
153.63  
142.72  
137.81  
135.10  
134.77  
134.44  
134.12  
132.80  
131.77  
130.52  
129.71  
128.97  
128.78  
128.29  
127.67  
126.93  
125.78  
125.74  
125.70  
125.66  
124.22  
123.70  
121.51  
118.78  
113.59  
77.31  
76.99  
76.68

Current Data Parameters  
NAME LFR-2-37-2-1-C  
PROCNO 1

F2 - Acquisition Parameters  
Date\_ Time 20230827 12.49  
INSTRUM spect  
PROBHD 5 mm PABBO-1H  
PULPROG zgpg30  
TD 65536  
SFO1 100.6228293 MHz  
SOLVENT CDCl3  
C4 256  
NS 24038.4 Hz  
DS 4  
AQ 1.3621488 sec  
FIDRES 0.3667798 Hz  
IN 20.800 usec  
DE 6.50 usec  
TE 300.2 K  
D1 2.0000000 sec  
D11 0.0300000 sec

===== CHANNEL f1 =====  
NUC1 13C  
P1 14.14 usec  
PL 0.00  
SFO1 100.6228293 MHz

===== CHANNEL f2 =====  
WALTZ16  
NUC2 13C  
NUC3 1H  
P2 20.0000000 usec  
PL2 0.00  
PLM2 0.8405000 W  
PLM3 0.8880997 W  
PLM4 0.8880997 W  
PLM5 0.8880997 W  
PLM6 0.8880997 W  
PLM7 0.8880997 W  
PLM8 0.8880997 W  
PLM9 0.8880997 W  
PLM10 0.8880997 W  
PLM11 0.8880997 W  
PLM12 0.8880997 W  
PLM13 0.8880997 W  
PLM14 0.8880997 W  
PLM15 0.8880997 W  
PLM16 0.8880997 W  
PLM17 0.8880997 W  
PLM18 0.8880997 W  
PLM19 0.8880997 W  
PLM20 0.8880997 W  
PLM21 0.8880997 W  
PLM22 0.8880997 W  
PLM23 0.8880997 W  
PLM24 0.8880997 W  
PLM25 0.8880997 W  
PLM26 0.8880997 W  
PLM27 0.8880997 W  
PLM28 0.8880997 W  
PLM29 0.8880997 W  
PLM30 0.8880997 W  
PLM31 0.8880997 W  
PLM32 0.8880997 W  
PLM33 0.8880997 W  
PLM34 0.8880997 W  
PLM35 0.8880997 W  
PLM36 0.8880997 W  
PLM37 0.8880997 W  
PLM38 0.8880997 W  
PLM39 0.8880997 W  
PLM40 0.8880997 W  
PLM41 0.8880997 W  
PLM42 0.8880997 W  
PLM43 0.8880997 W  
PLM44 0.8880997 W  
PLM45 0.8880997 W  
PLM46 0.8880997 W  
PLM47 0.8880997 W  
PLM48 0.8880997 W  
PLM49 0.8880997 W  
PLM50 0.8880997 W  
PLM51 0.8880997 W  
PLM52 0.8880997 W  
PLM53 0.8880997 W  
PLM54 0.8880997 W  
PLM55 0.8880997 W  
PLM56 0.8880997 W  
PLM57 0.8880997 W  
PLM58 0.8880997 W  
PLM59 0.8880997 W  
PLM60 0.8880997 W  
PLM61 0.8880997 W  
PLM62 0.8880997 W  
PLM63 0.8880997 W  
PLM64 0.8880997 W  
PLM65 0.8880997 W  
PLM66 0.8880997 W  
PLM67 0.8880997 W  
PLM68 0.8880997 W  
PLM69 0.8880997 W  
PLM70 0.8880997 W  
PLM71 0.8880997 W  
PLM72 0.8880997 W  
PLM73 0.8880997 W  
PLM74 0.8880997 W  
PLM75 0.8880997 W  
PLM76 0.8880997 W  
PLM77 0.8880997 W  
PLM78 0.8880997 W  
PLM79 0.8880997 W  
PLM80 0.8880997 W  
PLM81 0.8880997 W  
PLM82 0.8880997 W  
PLM83 0.8880997 W  
PLM84 0.8880997 W  
PLM85 0.8880997 W  
PLM86 0.8880997 W  
PLM87 0.8880997 W  
PLM88 0.8880997 W  
PLM89 0.8880997 W  
PLM90 0.8880997 W  
PLM91 0.8880997 W  
PLM92 0.8880997 W  
PLM93 0.8880997 W  
PLM94 0.8880997 W  
PLM95 0.8880997 W  
PLM96 0.8880997 W  
PLM97 0.8880997 W  
PLM98 0.8880997 W  
PLM99 0.8880997 W  
PLM100 0.8880997 W

F2 - Processing parameters  
SF 100.6127757 MHz  
WDW EM  
SSB 0  
GB 0  
PC 1.40

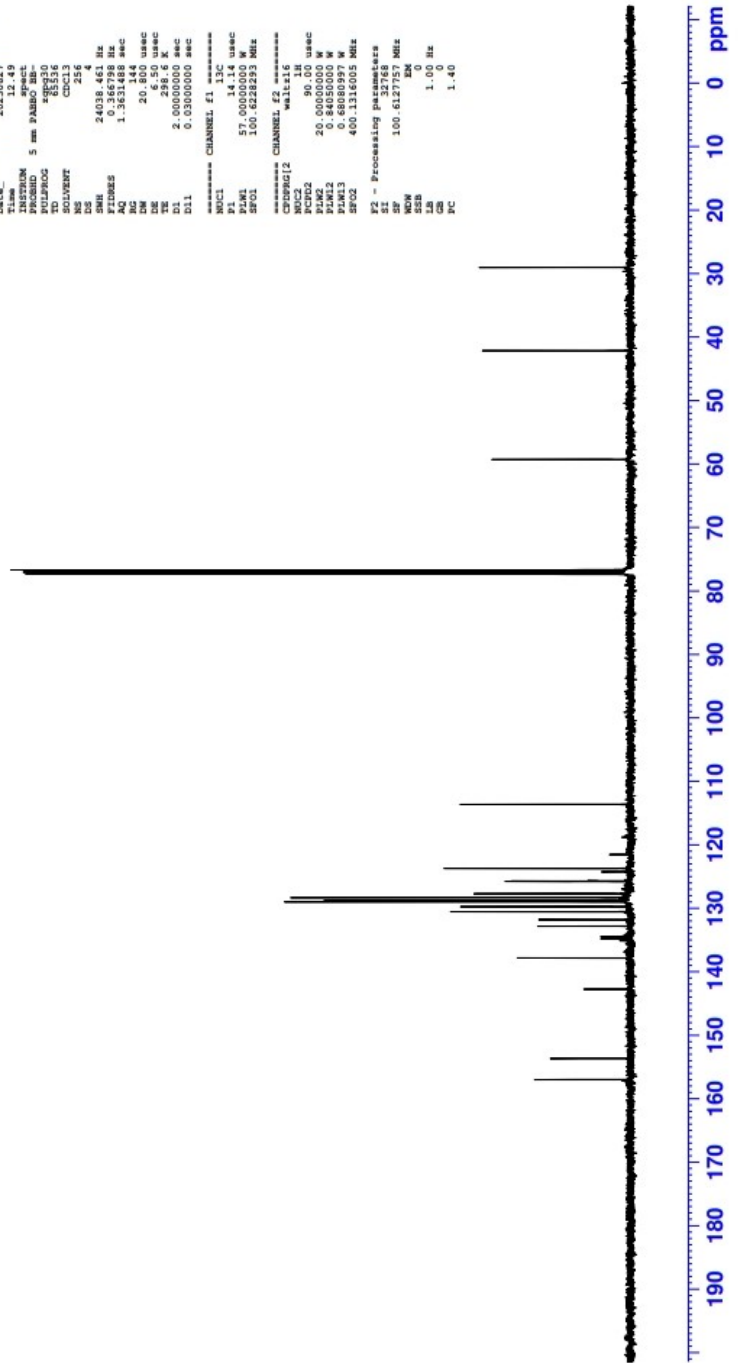

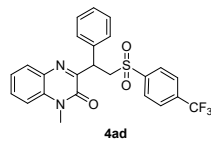

—63.26

```

Current Data Parameters
NAME LVR-2-37-2-1-F
EXPNO 1
PROCNO 1

F2 - Acquisition Parameters
Date_ 20230827
Time 12.33
INSTRUM spect
PROBHD 5 mm PABBO BB-
PULPROG zgpg30
TD 131072
SOLVENT CDCl3
NS 12
DS 4
SWH 89285.711 Hz
FIDRES 0.681196 Hz
AQ 0.7340032 sec
RG 203
DW 5.600 use
DE 6.50 use
TE 297.6 K
D1 1.00000000 sec
D11 0.03000000 sec
D12 0.00020000 sec

===== CHANNEL f1 =====
NUC1 19F
P1 25.25 use
PLW1 18.19700050 W
SFO1 376.4607164 MHz

===== CHANNEL f2 =====
CPDPRG2 waltz16
NUC2 1H
PCPD2 90.00 use
PLW2 20.00000000 W
PLW12 0.84050000 W
SFO2 400.1316005 MHz

F2 - Processing parameters
SI 65536
SF 376.4983660 MHz
WDW EM
SSB 0
LB 0.30 Hz
GB 0
PC 1.00

```

0 -10 -20 -30 -40 -50 -60 -70 -80 -90 -100 -110 -120 ppm

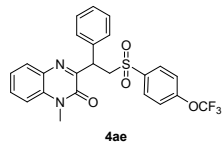

7.770  
7.753  
7.750  
7.750  
7.539  
7.521  
7.503  
7.500  
7.352  
7.350  
7.328  
7.323  
7.311  
7.307  
7.304  
7.259  
7.225  
7.216  
7.210  
7.206  
7.194  
7.175  
7.167  
7.164  
7.158  
7.150  
7.118  
7.098  
5.302  
5.291  
5.279  
5.268  
4.764  
4.741  
4.728  
4.704  
3.757  
3.747  
3.721  
3.710  
3.571

Current Data Parameters  
 NAME LVR-2-40-2-B  
 EXPNO 1  
 PROCNO 1

F2 - Acquisition Parameters  
 Date\_ 20231101  
 Time 4.52  
 INSTRUM QMARM-1  
 PROBRD probeinfo  
 PULPROG zgpg30  
 PCPRG2 zgpg30  
 SOLVENT CDCl3  
 NS 16  
 DS 2  
 SWH 8108.000 Hz  
 FIDRES 0.125004 Hz  
 AQ 3.9998767 sec  
 RG 57.69  
 DW 61.667 use  
 DE 30.00 use  
 TE 295.8 K  
 NUC1 1H  
 SF01 400.1113911 MHz  
 P1 1.0000000 sec  
 PL1 58.00 dB  
 PL1W 58.00 dB  
 PL1W 0.00001592 W

F2 - Processing parameters  
 SI 65536  
 SF 400.1050787 MHz  
 WDW EM  
 SSB 0  
 LB 0.30 Hz  
 GB 0  
 PC 4.00

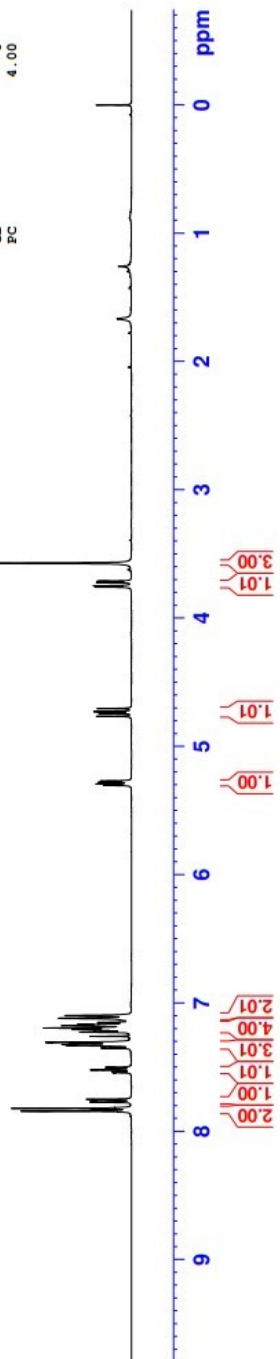

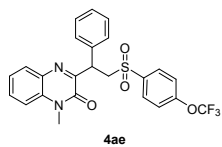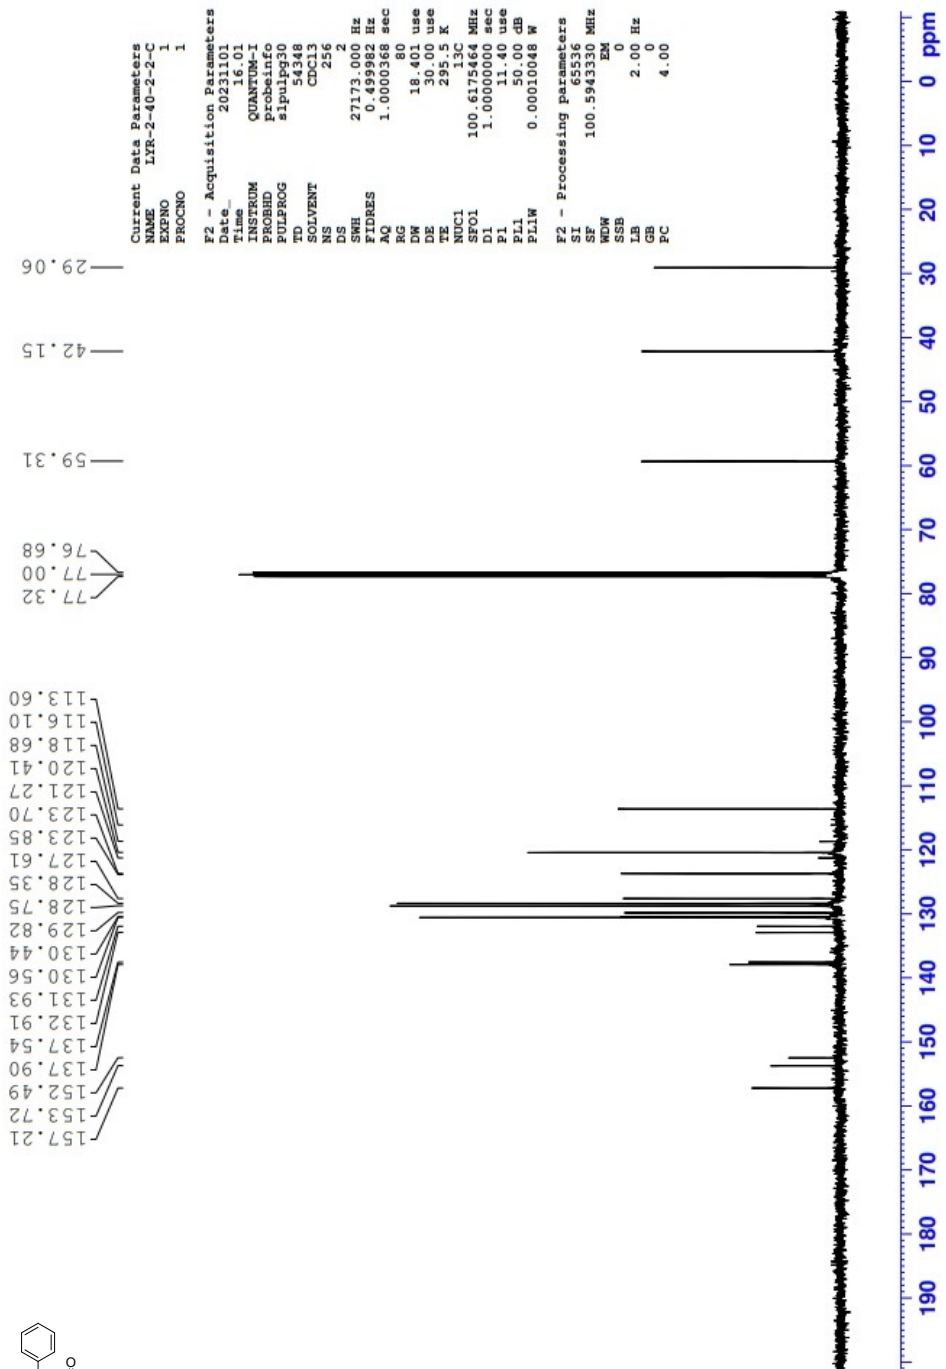

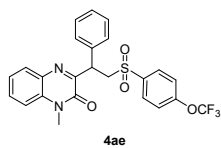

—57.78

```

Current Data Parameters
NAME      LYR-2-40-2-2-F
EXPNO     2
PROCNO    1

F2 - Acquisition Parameters
Date_     20231107
Time      10.20
INSTRUM   spect
PROBHD    5 mm PABBO-BB
PULPROG   zgpg30
TD         131072
SOLVENT   CDCl3
NS         16
DS         4
SMH        89285.711 Hz
FIDRES     0.681196 Hz
AQ         0.7340032 sec
RG         203
DW         5.600 use
DE         6.50 use
TE         299.2 K
D1         1.0000000 sec
D11        0.0300000 sec
D12        0.0002000 sec

===== CHANNEL f1 =====
NUC1       19F
P1         23.17 use
PLW1       18.1970050 W
SFO1       376.4607164 MHz

===== CHANNEL f2 =====
CDEPRG[2] waitz16
RG2        90.00 use
NUC2       13C
PLW2       20.0000000 W
SFO2       0.95436001 MHz
SFO2       400.1316005 MHz

F2 - Processing Parameters
SI         65536
SF         376.4983660 MHz
WDW        EM
SSB        0
LB         0.30 Hz
GB         0
PC         1.00

```

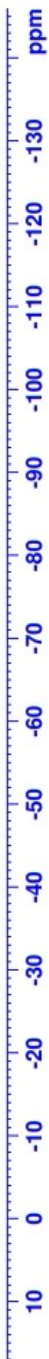

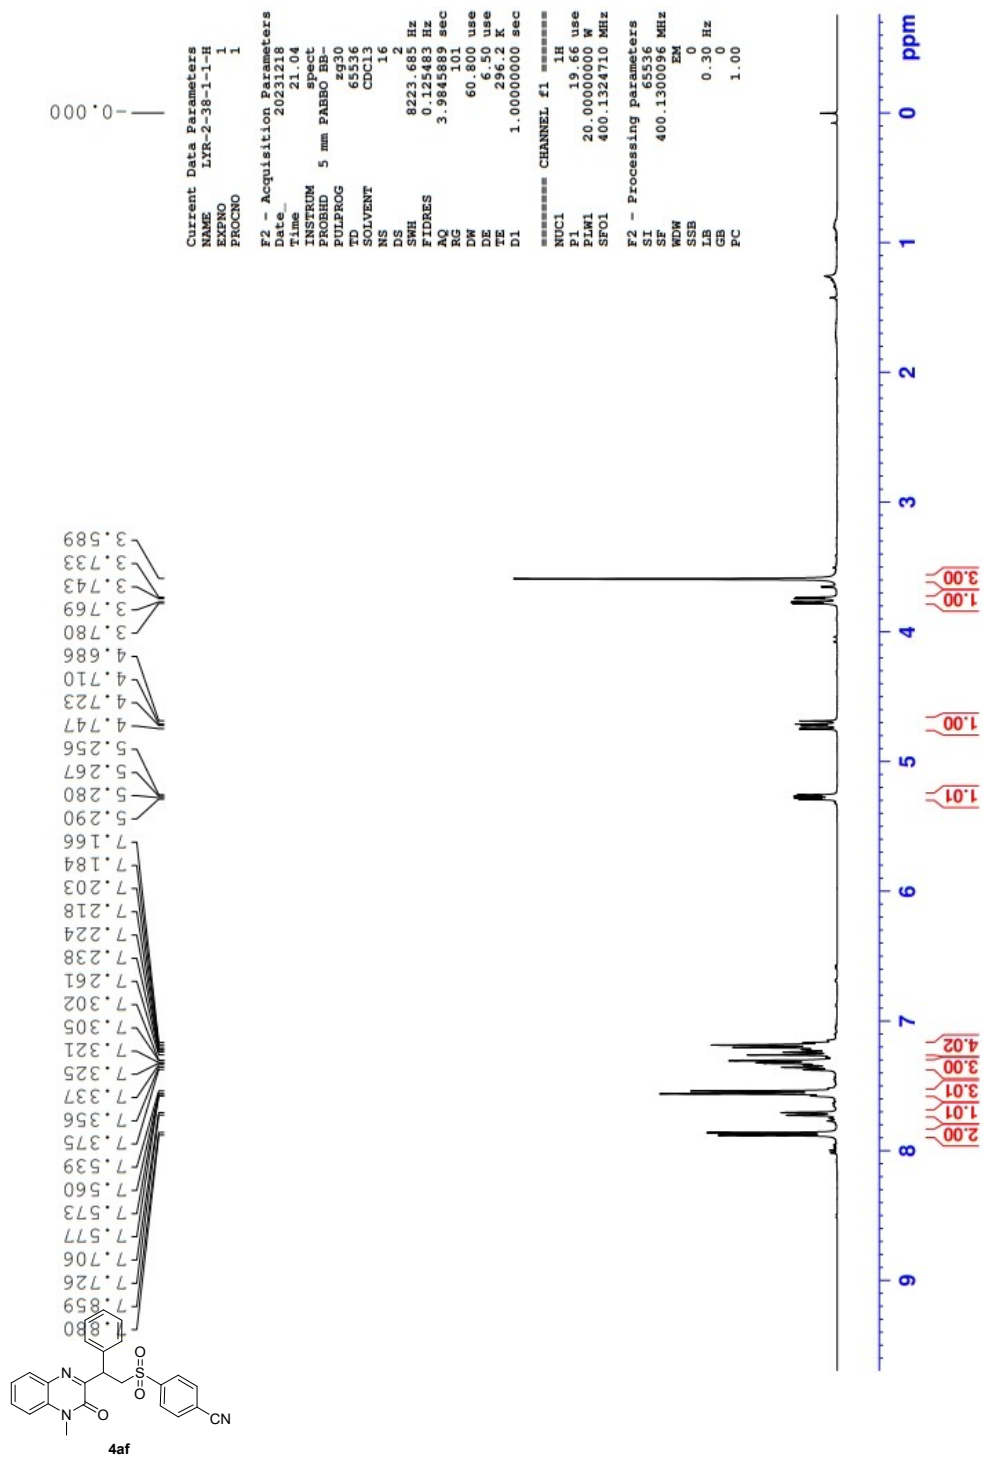

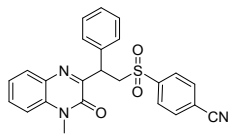

4af

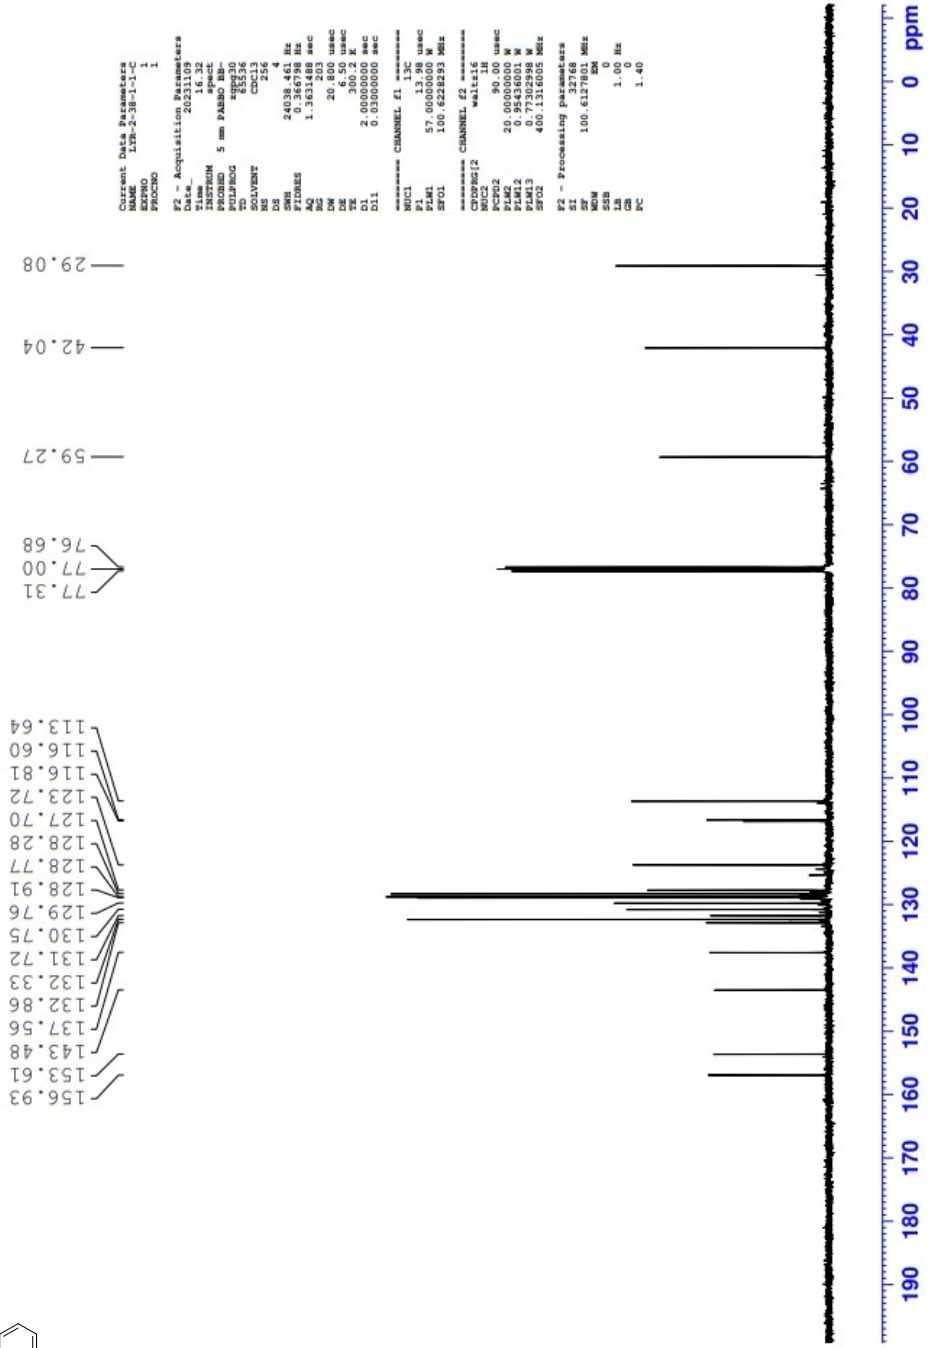

Current Data Parameters  
 NAME LTP-238-1-C  
 PROCNO 1

===== Acquisition Parameters =====  
 Date\_ 20231109  
 Time 16.32  
 INSTRUM spect  
 PROBNM 5 mm PABBO WB  
 PULPROG zgpg30  
 TO F2ES36  
 SOLVENT CDCl3  
 NS 256  
 DS 4  
 SWH 24038.46 Hz  
 FIDRES 0.366796 Hz  
 AQ 1.3631888 sec  
 SFO1 100.6228293 MHz  
 ZW 20.800 usec  
 DE 6.50 usec  
 DT 0.0000002 sec  
 D1 2.00000000 sec  
 D11 0.03000000 sec

===== CHANNEL f1 =====  
 NUCL1 13C  
 P1 57.0001398 usec  
 PL1 0.00  
 SFO1 100.6228293 MHz

===== CHANNEL f2 =====  
 CPDPRG2 waltz16  
 NUCL2 1H  
 P2 0.00  
 PL2 0.00 usec  
 PLM12 0.95436001 W  
 PLM13 0.77302998 W  
 PLM14 0.95436001 W  
 SFO2 400.1516858 MHz

===== Processing parameters =====  
 SI 32768  
 SF 100.6127801 MHz  
 EQ 1.00 Hz  
 AS 0  
 GB 1.40  
 PC

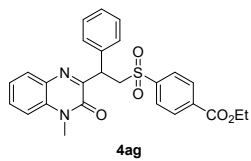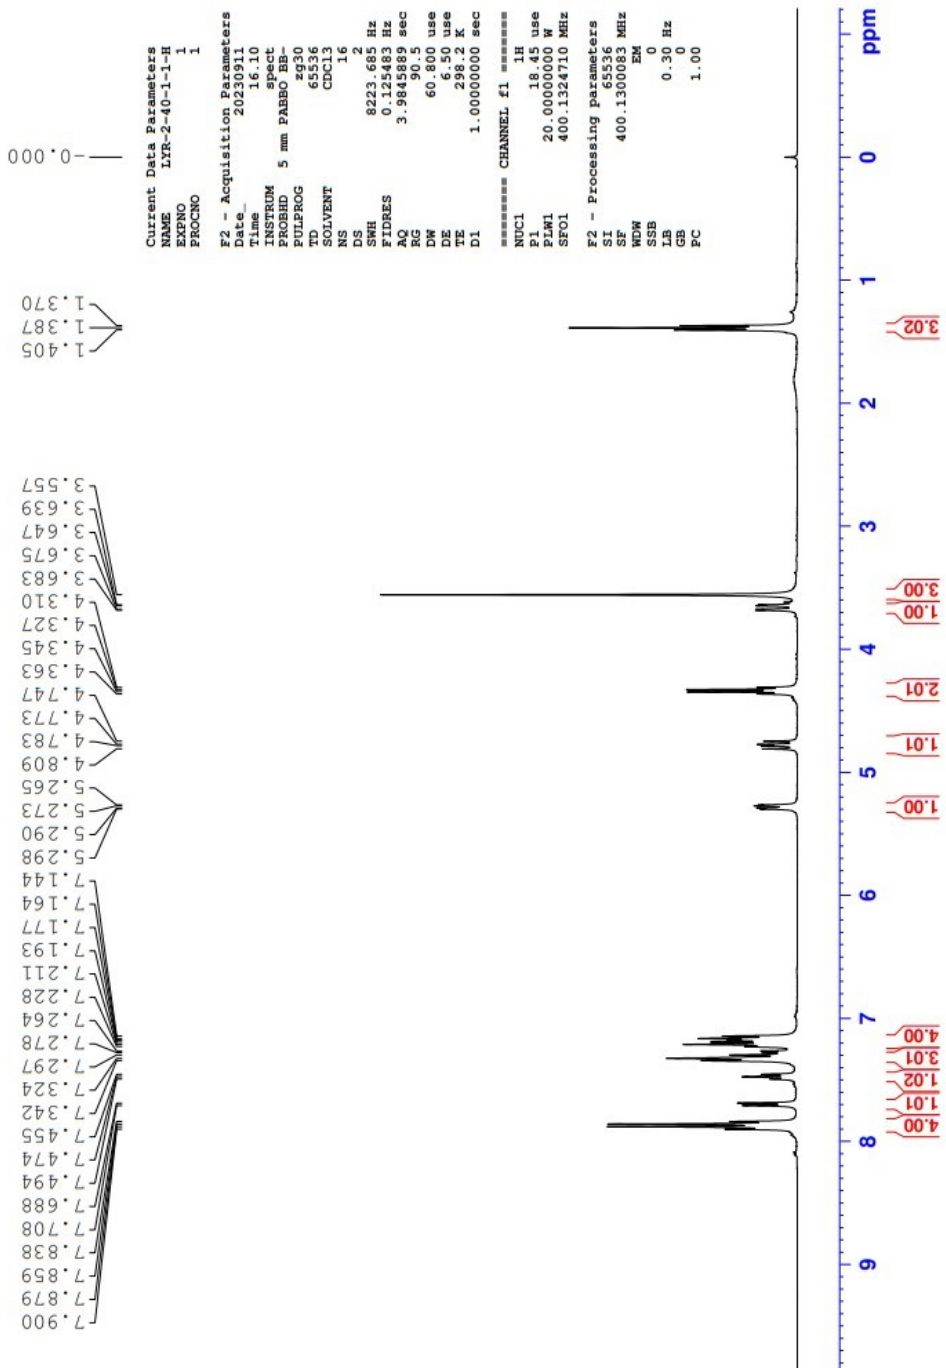



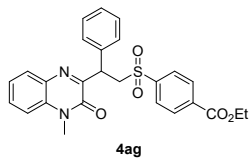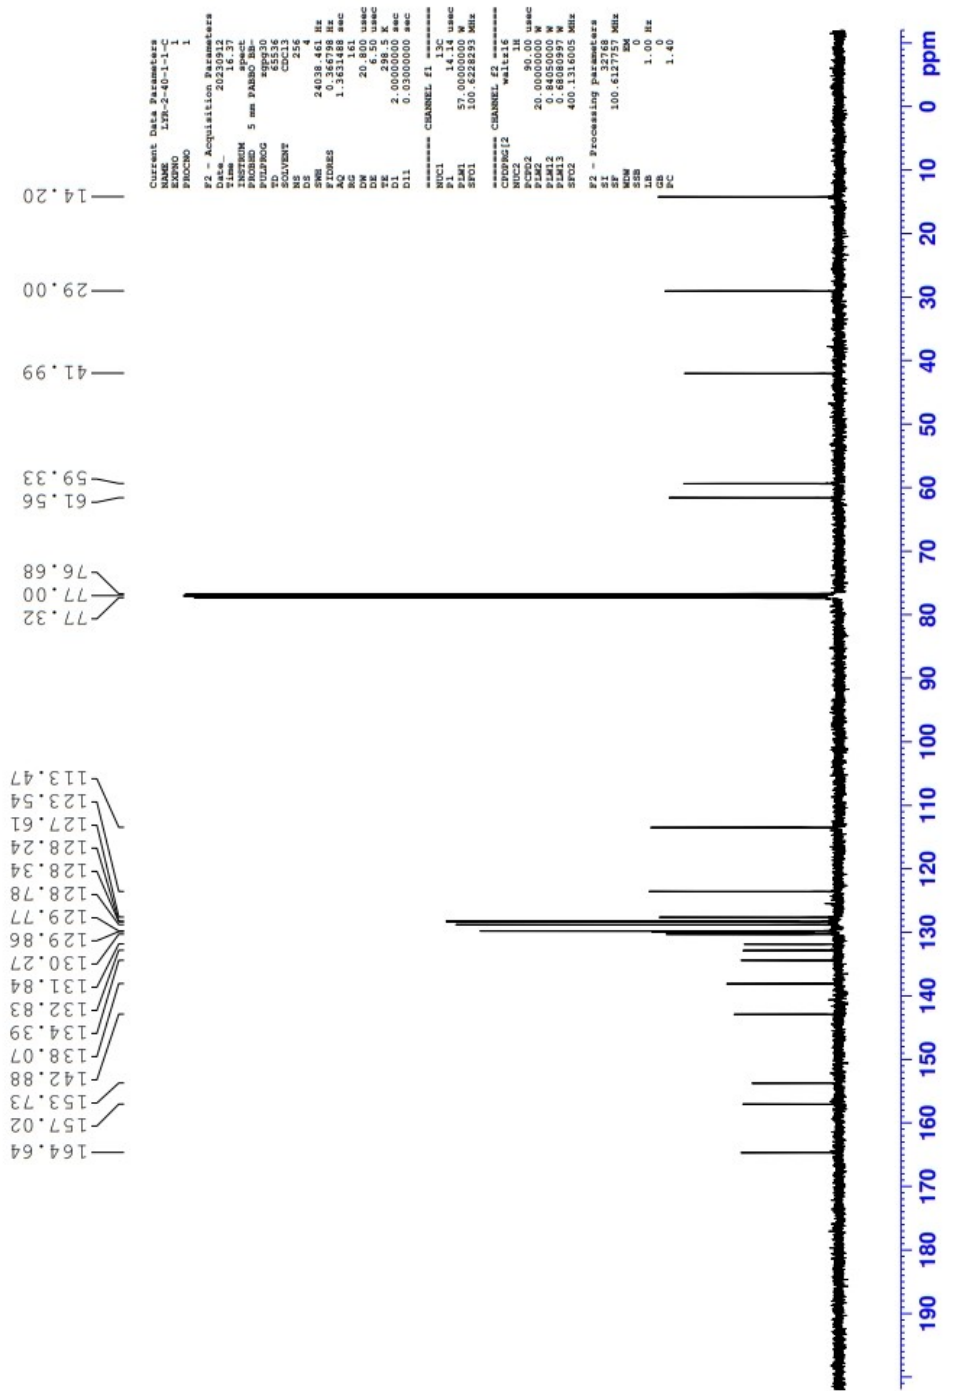

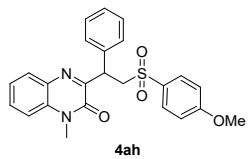

7.765  
7.745  
7.716  
7.694  
7.512  
7.493  
7.473  
7.354  
7.336  
7.325  
7.306  
7.287  
7.260  
7.234  
7.216  
7.197  
7.184  
7.162  
7.157  
6.692  
6.670  
5.262  
5.255  
5.236  
5.229  
4.810  
4.784  
4.774  
4.748  
3.623  
3.606  
3.577  
3.569  
3.540

Current Data Parameters  
 NAME LXR-2-41-2-1-H  
 EXPNO 1  
 PROCNO 1

F2 - Acquisition Parameters  
 Date\_ 20230921  
 Time 11:45  
 INSTRUM spect  
 PROBHD 5 mm PABBO BB-  
 PULPROG zg30  
 TD 65536  
 SOLVENT CDCl3  
 NS 16  
 DS 2  
 SWH 8223.685 Hz  
 FIDRES 0.125483 Hz  
 AQ 3.984589 sec  
 RG 890  
 DW 60.800 use  
 DE 6.90 use  
 TE 298.1 K  
 D1 1.00000000 sec

===== CHANNEL f1 =====  
 NUC1 1H  
 P1 18.45 use  
 PLW1 20.0000000 W  
 SFO1 400.1324710 MHz

F2 - Processing Parameters  
 SI 65536  
 SF 400.1300198 MHz  
 NPM 8K  
 SSB 0  
 LB 0.30 Hz  
 GB 0  
 PC 1.00

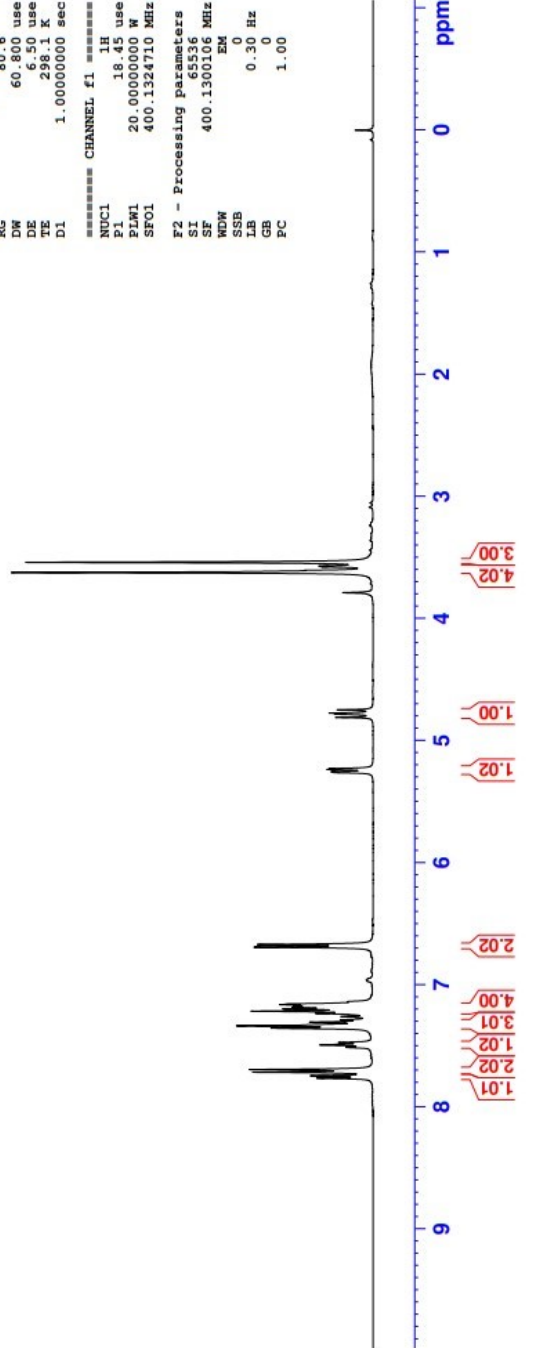

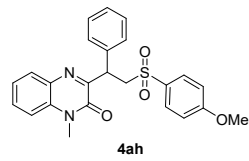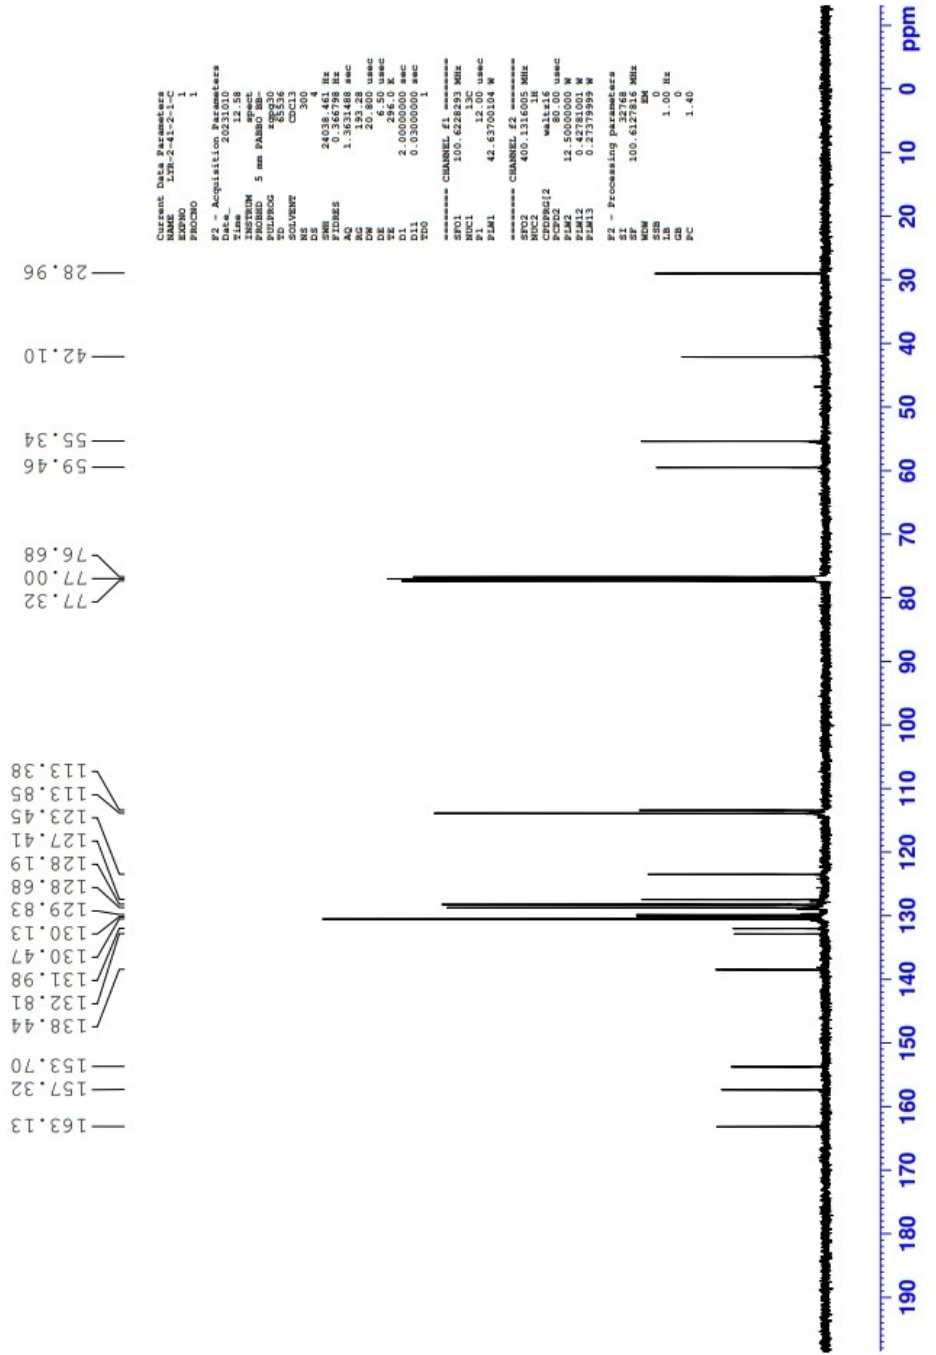

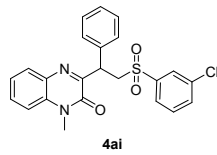

7.733  
7.714  
7.689  
7.673  
7.673  
7.535  
7.535  
7.516  
7.496  
7.355  
7.336  
7.312  
7.293  
7.258  
7.234  
7.216  
7.212  
7.197  
7.182  
7.164  
5.323  
5.314  
5.298  
4.768  
4.743  
4.732  
4.707  
3.709  
3.700  
3.673  
3.586

Current Data Parameters  
 NAME LXR-2-38-2-1-H  
 EXPNO 1  
 PROCNO 1

F2 - Acquisition Parameters  
 Date\_ 20231027  
 Time 10.26  
 INSTRUM QUNTAUM-1  
 PROBRD Probesino  
 PULPROG zgpg30  
 TD 6460  
 SOLVENT CDCl3  
 NS 16  
 DS 2  
 SWH 8108.000 Hz  
 FIDRES 0.125004 Hz  
 AQ 3.9998767 sec  
 RG 55.84  
 DW 61.667 use  
 DE 30.00 use  
 TE 295.8 K  
 NUC1 1H  
 P1 400.1113911 MHz  
 SFO1 1.0000000 sec  
 P2 11.60 use  
 PL1 58.00 dB  
 PL12 0.00001592 W

F2 - Processing parameters  
 SI 65536  
 SF 400.1050780 MHz  
 WDW EM  
 SSB 0  
 LB 0.30 Hz  
 GB 0  
 PC 4.00

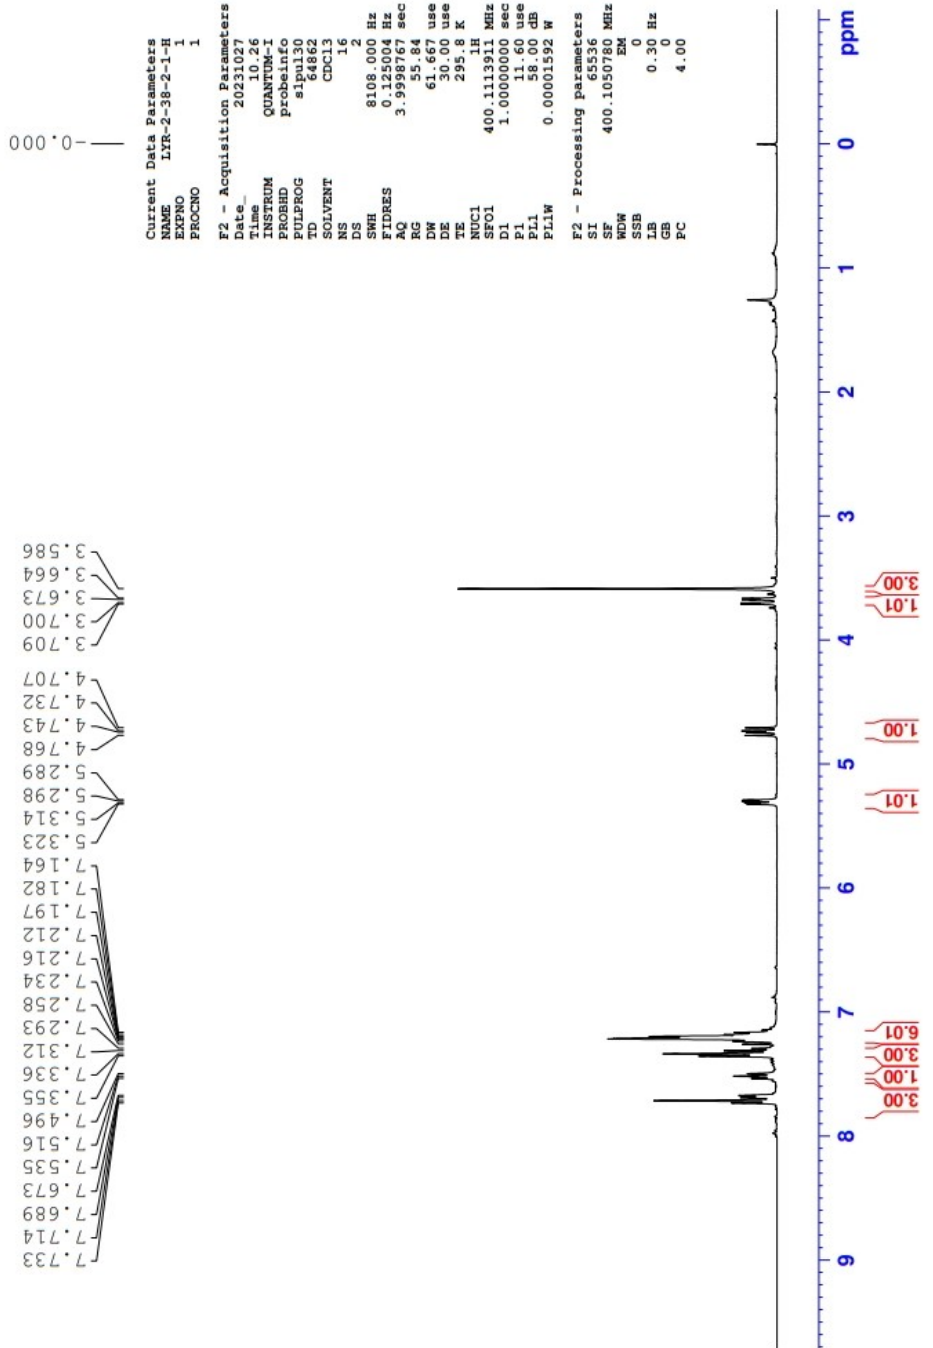

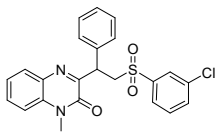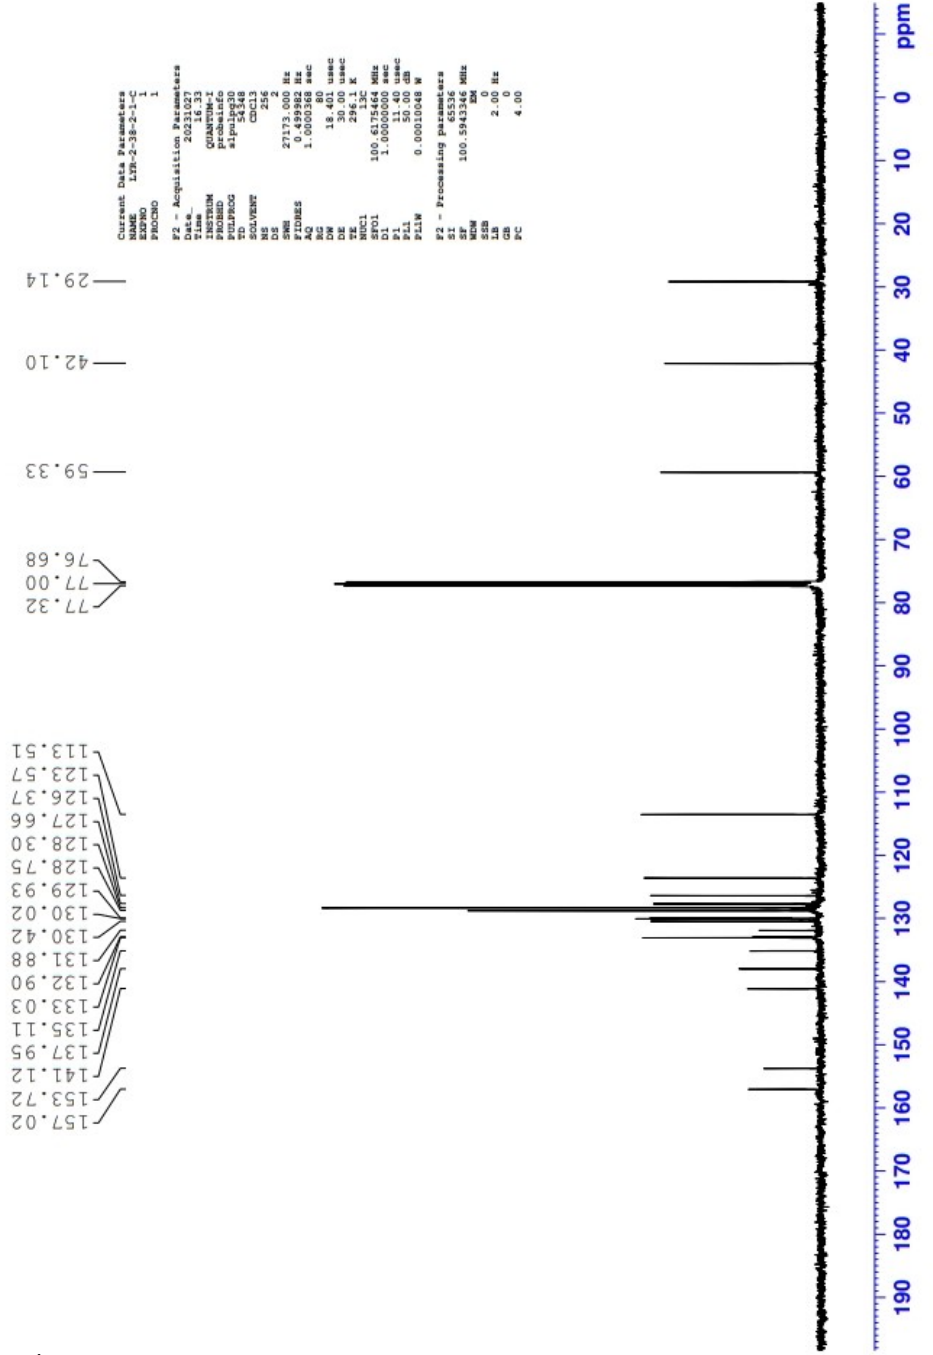

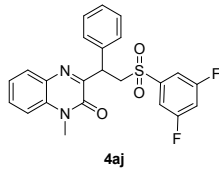

7.363  
7.346  
7.329  
7.311  
7.309  
7.301  
7.296  
7.293  
7.289  
7.285  
7.280  
7.258  
7.242  
7.240  
7.222  
7.203  
7.191  
7.188  
7.184  
7.176  
7.170  
6.720  
6.714  
6.708  
6.699  
6.693  
6.687  
6.678  
6.672  
6.666  
5.337  
5.326  
5.313  
5.302  
4.711  
4.687  
4.674  
4.651  
3.760  
3.749  
3.724  
3.713  
3.601

Current Data Parameters  
 NAME LXR-2-43-2-H  
 EXPNO 1  
 PROCNO 1

F2 - Acquisition Parameters  
 Date\_ 20230826  
 Time 12.06  
 INSTRUM spect  
 PULPROG 5 mm PABBO B90  
 F2 - Processing parameters  
 SI 65536  
 SF 400.1300110 MHz  
 WDW EM  
 SSB 0  
 LB 0.30 Hz  
 GB 0  
 PC 1.00

===== CHANNEL f1 =====  
 NUC1 1H  
 P1 18.45 use  
 PLW1 20.0000000 W  
 SFO1 400.1324710 MHz

F2 - Processing parameters  
 SI 65536  
 SF 400.1300110 MHz  
 WDW EM  
 SSB 0  
 LB 0.30 Hz  
 GB 0  
 PC 1.00

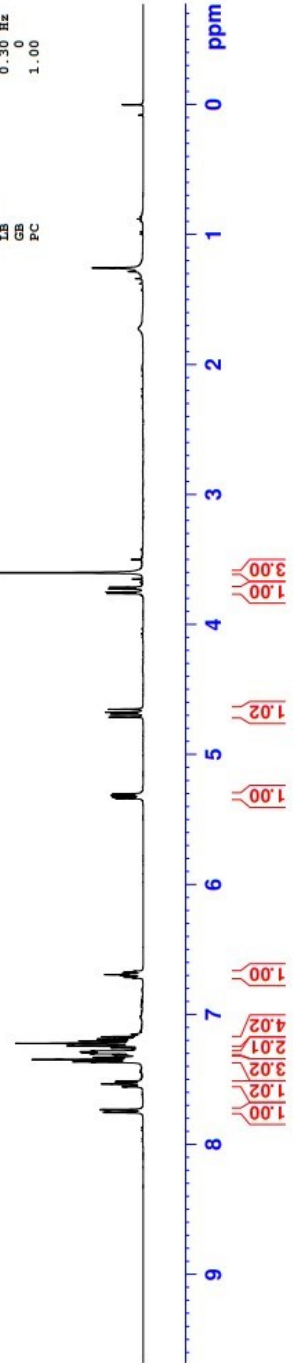

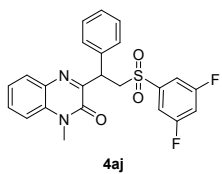

163.78  
163.67  
161.24  
161.13  
156.97  
153.75  
142.94  
142.86  
142.78  
137.64  
132.91  
131.85  
130.54  
129.81  
128.76  
128.35  
127.74  
123.68  
113.58  
111.89  
111.81  
111.69  
111.61  
108.78  
108.53  
108.28

77.32  
77.00  
76.68

59.33  
42.05  
29.11

Current Data Parameters  
 Name: LIP-243-2-2-1  
 EXPNO: 1  
 PROCNO: 1  
 F2 - Acquisition Parameters  
 Date\_: 20230826  
 Time: 12.22  
 Operator:   
 PULPROG: zgpg30  
 PROBMG: 5 mm PABBO MR-  
 SOLVENT: CDCl3  
 NS: 256  
 DS: 4  
 SWH: 24038.461 Hz  
 FIDRES: 0.366798 Hz  
 AQ: 1.3515661 sec  
 RG: 661  
 DW: 20.800 usec  
 DE: 5.70 usec  
 DI: 2.0000000 sec  
 D11: 0.0300000 sec  
 ===== CHANNEL f1 =====  
 NUC1: 13C  
 P1M1: 57.0000000 M  
 SFO1: 100.6282823 MHz  
 ===== CHANNEL f2 =====  
 CDEPRG2: Waltz16  
 NUC2: 1H  
 P1M2: 20.0000000 M  
 SFO2: 400.1316005 MHz  
 F2 - Processing parameters  
 SF: 100.6127772 MHz  
 DS: 4  
 SSB: 0  
 LB: 1.00 Hz  
 GB: 0  
 PC: 1.40

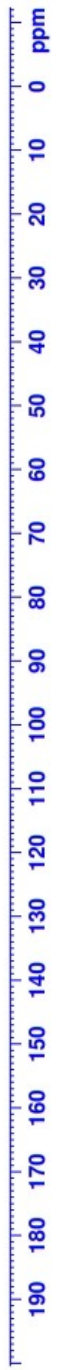

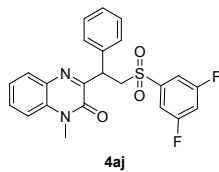

—105.40

```

Current Data Parameters
NAME LXR-2-43-2-2-F
EXPNO 1
PROCNO 1

F2 - Acquisition Parameters
Date_ 20231020
Time 15:28
INSTRUM spect
PROBHD 5 mm PABBO BR-
PULPROG zgpg30
TD 131072
SOLVENT CDCl3
NS 16
DS 4
SWH 89285.711 Hz
FIDRES 0.681196 Hz
AQ 0.7340032 sec
RG 5203
DW 5.600 use
DE 19.50 use
TE 297.2 K
D1 1.00000000 sec
D11 0.03000000 sec
D12 0.00002000 sec

===== CHANNEL f1 =====
NUC1 19F
P1 22.17 use
PLW1 18.19700050 W
SFO1 376.4607164 MHz

===== CHANNEL f2 =====
CPDPRG2 waltz16
NUC2 13C
PCPD2 90.40 use
PLW2 20.00000000 W
PLW12 0.95436001 W
SFO2 400.1316005 MHz

F2 - Processing parameters
SI 65536
SF 376.4983660 MHz
WDW EM
SSB 0
LB 0.30 Hz
GB 0
FC 1.00

```

0 -20 -40 -60 -80 -100 -120 -140 -160 -180 -200 ppm



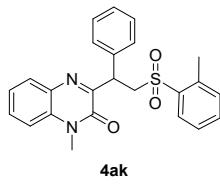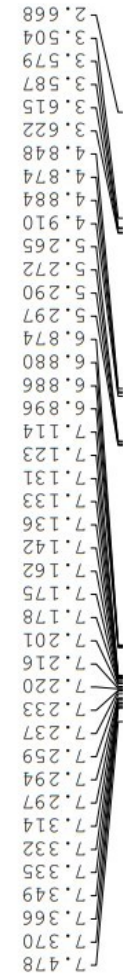

Current Data Parameters  
 NAME LYR-2-39-1-2-H  
 EXPNO 1  
 PROCNO 1

F2 - Acquisition Parameters  
 Date\_ 20230911  
 Time 15.58  
 INSTRUM spect  
 PROBHD 5 mm PABBO BB-  
 PULPROG zg30  
 TD 65536  
 SOLVENT CDCl3  
 NS 16  
 DS 2  
 SWH 8223.685 Hz  
 FIDRES 0.125888 Hz  
 AQ 3.984138 sec  
 RG 128  
 DW 60.800 use  
 DE 6.50 use  
 TE 298.3 K  
 D1 1.00000000 sec

\*\*\*\*\* CHANNEL f1 \*\*\*\*\*  
 NUC1 1H  
 P1 18.45 use  
 PLW1 20.00000000 W  
 SF01 400.1324710 MHz

F2 - Processing Parameters  
 SI 65536  
 SF 400.1300104 MHz  
 WDW EM  
 SSB 0  
 LB 0.30 Hz  
 GB 0  
 PC 1.00

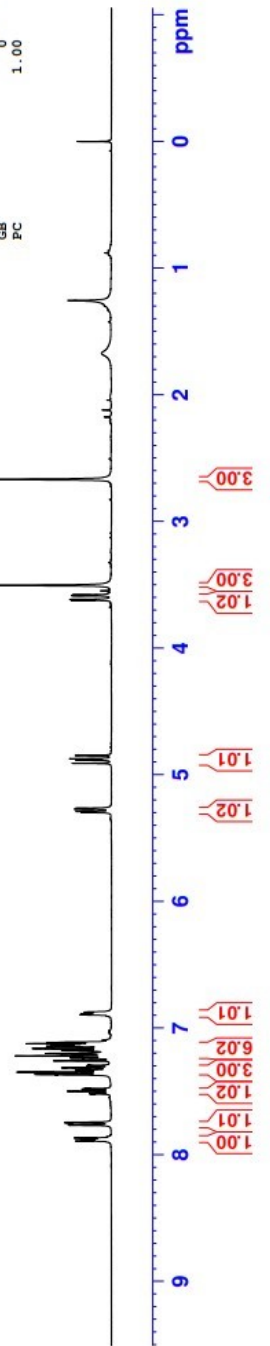

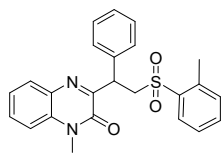

4ak

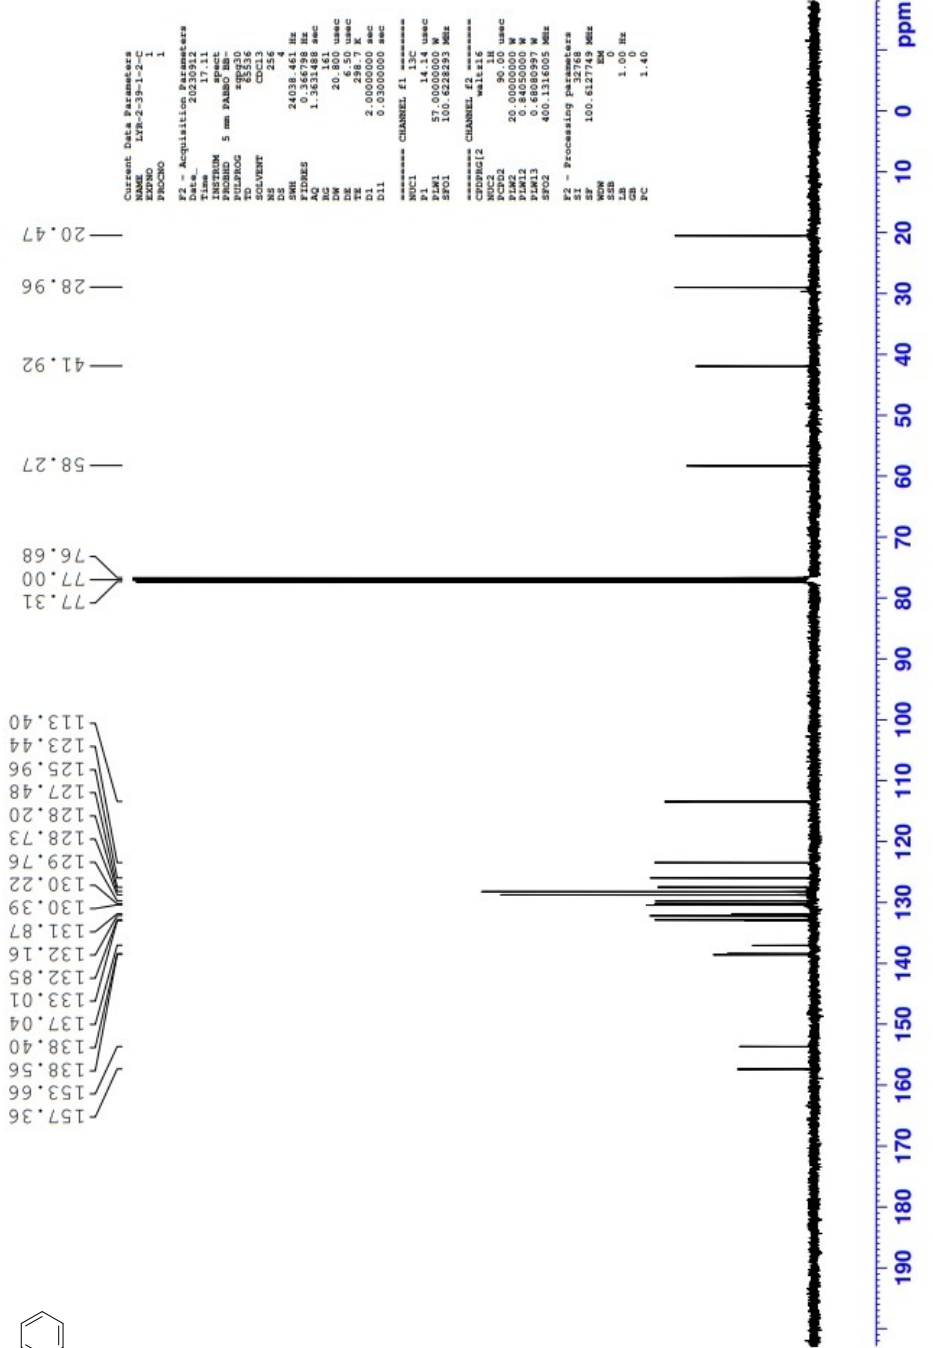

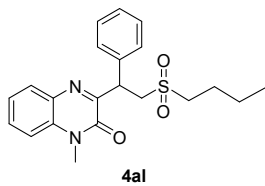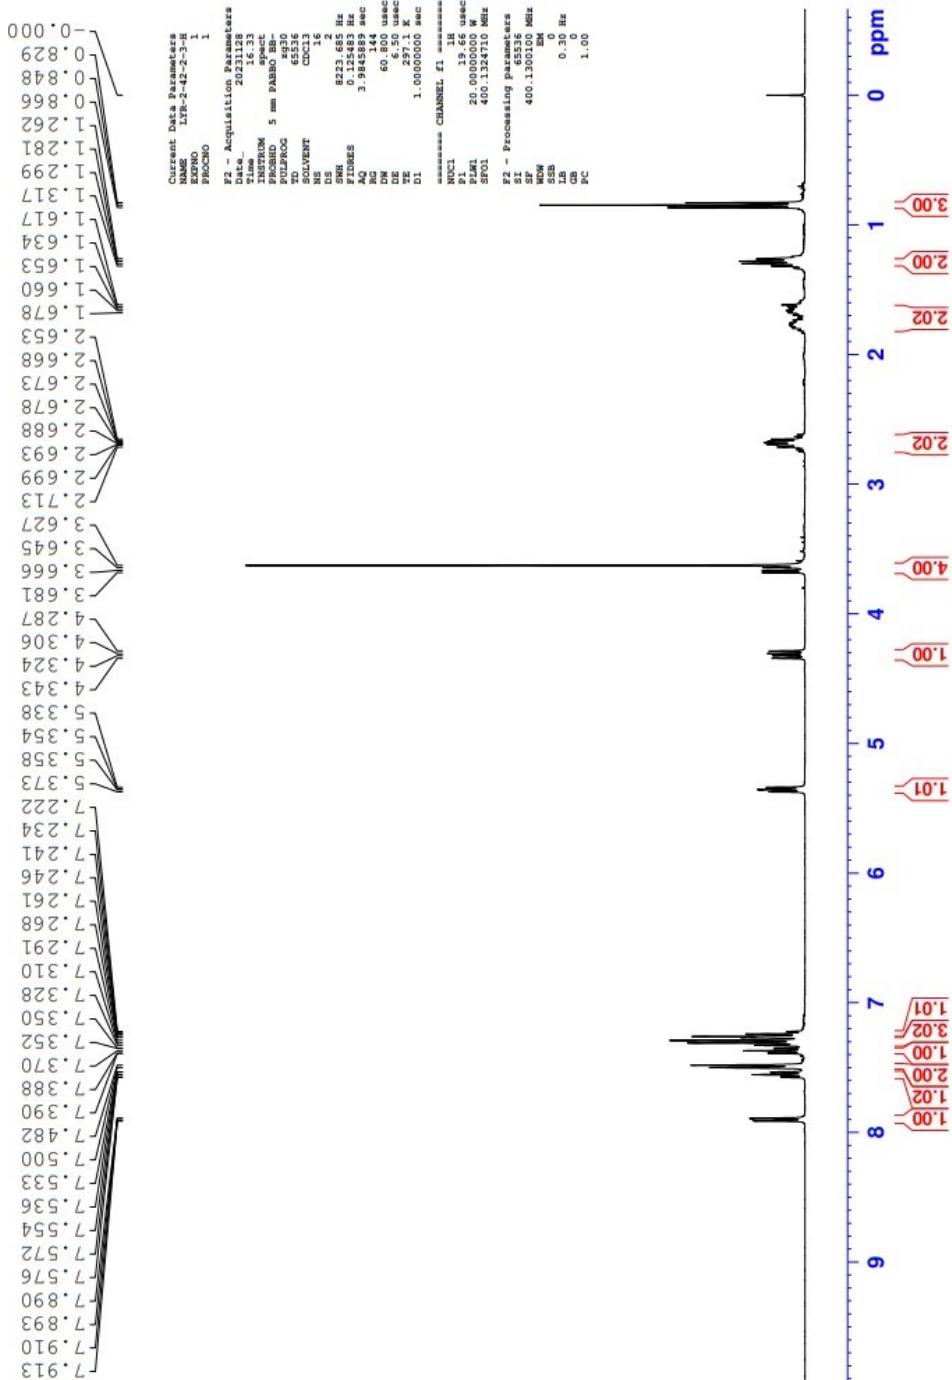

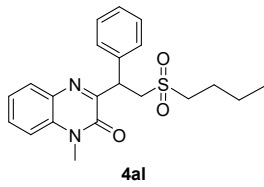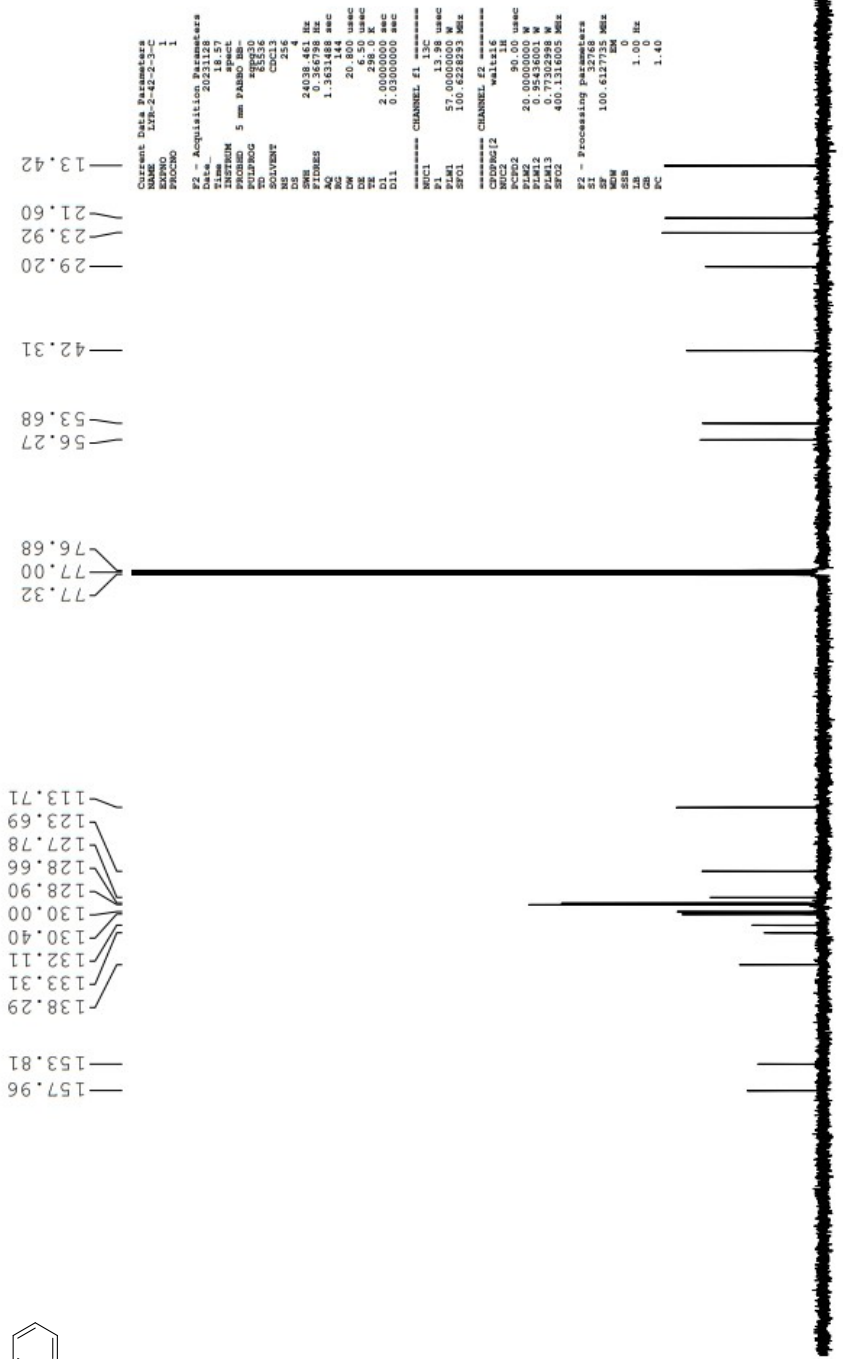

190 180 170 160 150 140 130 120 110 100 90 80 70 60 50 40 30 20 10 0 ppm

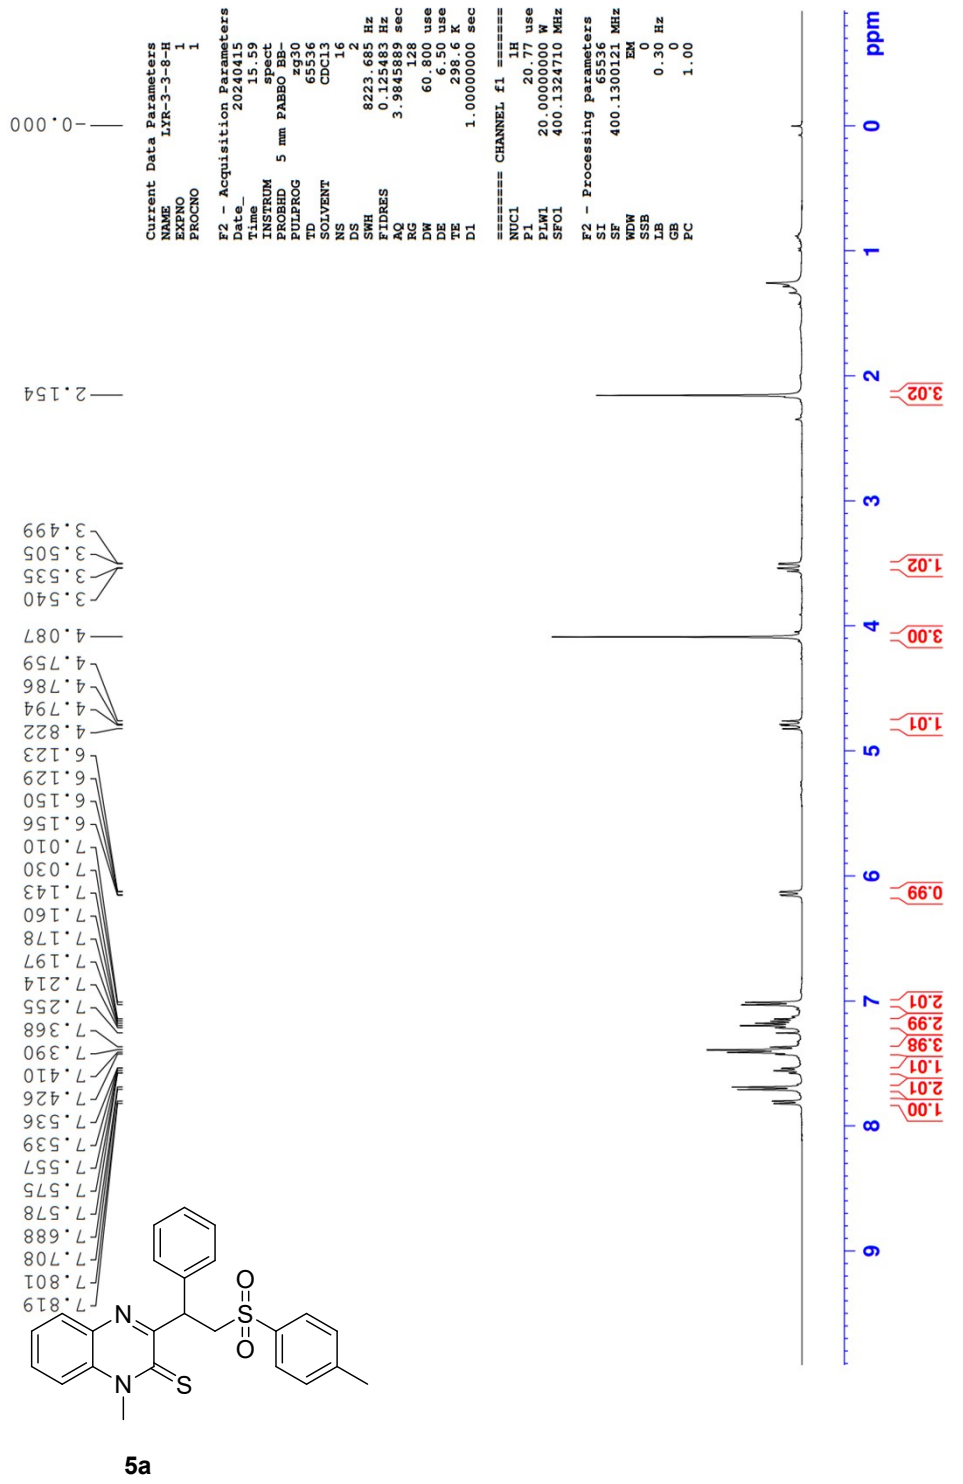

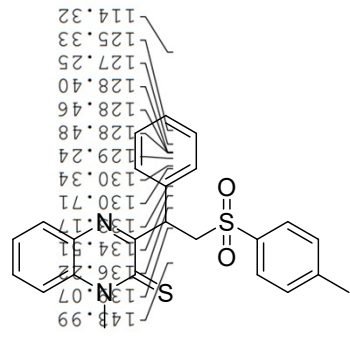

176.57  
170.61  
148.99  
138.07  
136.22  
134.91  
130.71  
130.34  
129.24  
128.48  
128.46  
128.40  
127.25  
125.33  
114.32

77.29  
76.98  
76.66

60.99  
44.24  
37.93  
21.32

Current Data Parameters  
 NAME LYR-3-8-C  
 EXPRNO 1  
 PROCNO 1

F2 - Acquisition Parameters  
 Date\_ 20240415  
 Time\_ 17.11  
 INSTRUM QUNTUM-I  
 PROBHD probeinfo  
 PULPROG zgpg30  
 TD 54348  
 SOLVENT CDCl3  
 NS 512  
 DS 2  
 SWH 27173.000 Hz  
 FIDRES 0.499982 Hz  
 AQ 1.0000368 sec  
 RG 80  
 DW 18.401 use  
 DE 30.000 use  
 TE 296.2 K  
 NUC1 13C  
 SFO1 100.6175464 MHz  
 D1 1.0000000 sec  
 P1 11.40 use  
 PL1 50.00 dB  
 PL1W 0.00010048 W

F2 - Processing parameters  
 SI 65536  
 SF 100.5943354 MHz  
 EQ  
 WDW EM  
 SSB 0  
 GB 2.00 Hz  
 PC 4.00

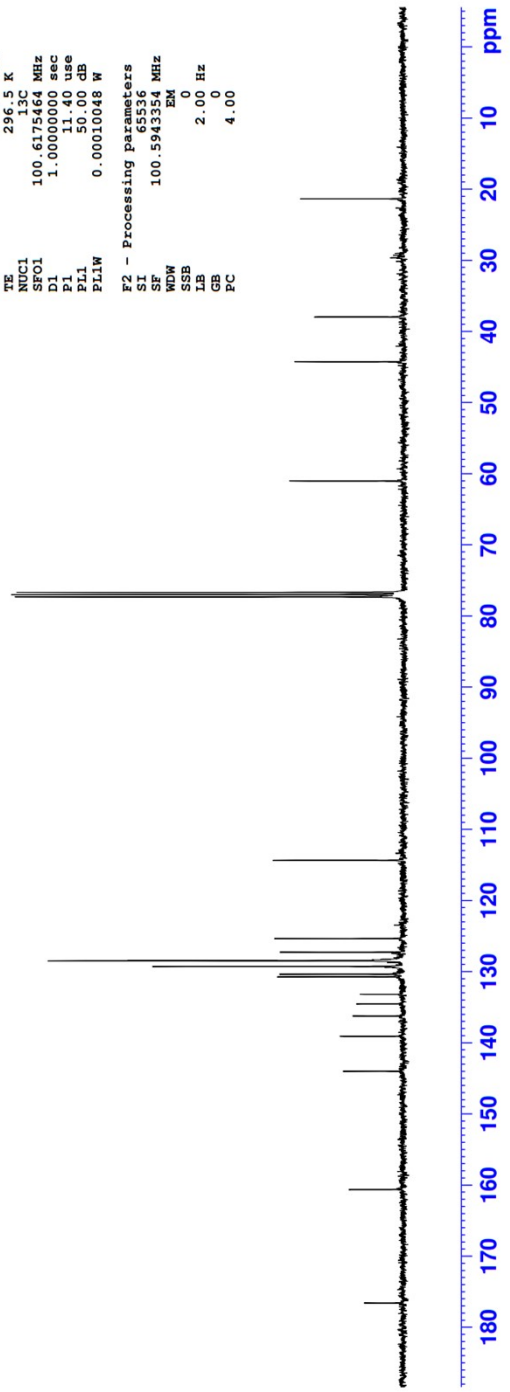

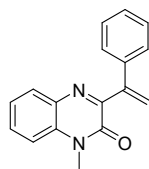

6a

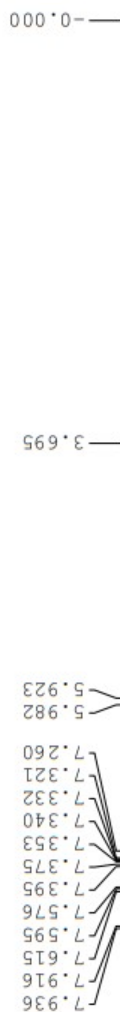

Current Data Parameters  
 NAME LVR-20240718-OLE-H  
 EXPNO 1  
 PROCNO 1

F2 - Acquisition Parameters  
 Date\_ 20240718  
 Time 10.43 h  
 INSTRUM spect  
 PUSHD 03823  
 FULPROG 65536  
 TD 65536  
 SOLVENT CDCl3  
 NS 8  
 DS 2  
 SWH 8802.817 Hz  
 FIDRES 0.268641 Hz  
 AQ 3.7224448 sec  
 RG 193.28  
 DW 56.800 use  
 DE 6.50 use  
 TE 283.2 K  
 D1 1.00000000 sec  
 TDO 1  
 SF01 400.1324710 MHz  
 NUC1 1H  
 P1 14.80 use  
 PLM1 12.50000000 W

F2 - Processing parameters  
 SI 65536  
 SF 400.1300103 MHz  
 WDW EM  
 SSB 0  
 LB 0.30 Hz  
 GB 0  
 PC 1.00

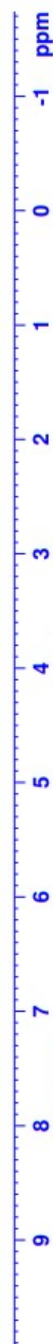

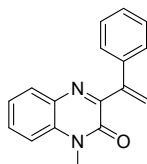

6a

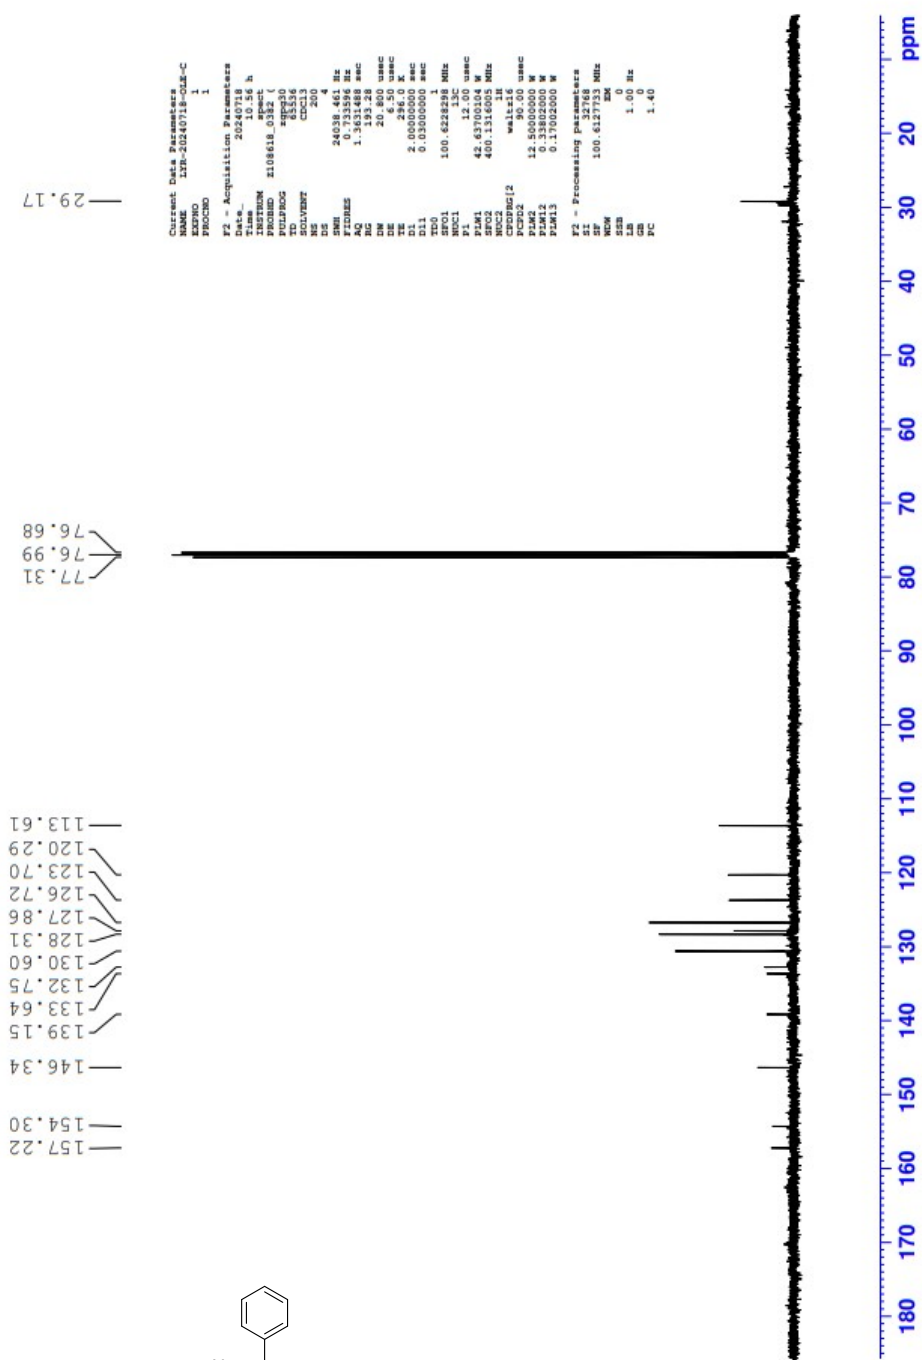

Supplement: d4ob00960f1.pdf [file d4ob00960f1.pdf]
